# Supplementary material for: Large-scale instability of a generalized turbulent Kolmogorov flow
Source: Copernicus journal article supplement (doi:10.5194/npg-16-569-2009), 2009-08-31

# Instability of the Kolmogorov flow with modified viscosity

Numerical solution of the perturbation at orders 1 and 2 for f1 and f2b, and determination of the threshold  $\Delta c$

version using NDSolve

## Various initializations

### ■ Suppression of annoying messages

```
Off[General::spell]
Off[General::spell1]
Off[Union::heads]
Off[NDSolve::ndinn]
Off[NDSolve::berr]
Off[MessageOptions]
```

```
Flow2 =  $\theta \rightarrow \text{Evaluate}[\# + 1/2 \sin[2\#] \&];$ 
Flow1 =  $\theta \rightarrow \text{Evaluate}[\# \&];$ 
Flow3 =  $\theta \rightarrow \text{Evaluate}[\# + 1/4 \sin[2\#] \&];$ 
```

---

## Solution of the 1st order perturbation

Numerical solution is now performed using NDSolve

## Standard problem with presence of $\mu$ term

### ■ The two pieces of the linear operator

$$\text{Tra}[\mu\_]:= \frac{(\mu \sin[\theta[y]]^2 + 2 \cos[\theta[y]]^2 \theta'[y]^2)}{\sqrt{\mu \sin[\theta[y]]^2 + \cos[\theta[y]]^2 \theta'[y]^2}}$$

$$\text{Trb}[\mu\_]:= \frac{\sin[2 \theta[y]] \theta'[y]}{2 \sqrt{\mu \sin[\theta[y]]^2 + \cos[\theta[y]]^2 \theta'[y]^2}}$$

### ■ The forms of the linear operator

L0 : standard linear operator

L1 : linear operator integrated once outside

L1d : linear operator integrated once outside and inside

L2 : linear operator integrated twice outside

L2d : linear operator integrated twice outside and once inside

```
L0[f_, μ_] := ∂y,y ( Tra[μ] ∂y,y f ) + μ ∂y,y ( Trb[μ] ∂y f )
L1[f_, μ_] := ∂y ( Tra[μ] ∂y,y f ) + μ ∂y ( Trb[μ] ∂y f )
L1d[f_, μ_] := ∂y ( Tra[μ] ∂y f ) + μ ∂y ( Trb[μ] f )
L2[f_, μ_] := (Tra[μ] ∂y,y f ) + μ (Trb[μ] ∂y f )
L2d[f_, μ_] := (Tra[μ] ∂y f ) + μ (Trb[μ] f )
```

## Solution for h1 and g1

Find solution for h1 where  $\frac{1}{C} h1 = \partial_y f1$

Since f1 has Sin[y] symmetry, h1 has Cos[y] symmetry

h1p is an interpolating function obtained for a value of  $\mu$  and a given flow.

Define also g1 such that  $\frac{1}{C} g1 = f1$

```
h1p =
Part[NDSolve[{L2d[h1[y], #1] == -Sin[θ[y]] /. #2, h1[π/2] == 0},
h1, {y, 0, π}], 1, 1] &;
```

Obsolete versions to obtain g1 as a second step after getting h1

```
mg1[s_?NumberQ,  $\mu$ _, Flow_] :=
  NIntegrate[h1[y] /. h1p[ $\mu$ , Flow], {y, 0, s}]
mgg1 =
  Part[NDSolve[{g1'[y] == h1[y] /. h1p[#1, #2], g1[0] == 0}, g1,
    {y, 0,  $\frac{\pi}{2}$ }], 1, 1] &;
```

New version, obtaining g1 directly since NDSolve is now able to handle boundary value problems

Notice that no integration constant appear in this problem

```
mgg1 =
  Part[NDSolve[{L2d[g1'[y], #1] == -Sin[ $\theta$ [y]] /. #2, g1'[ $\frac{\pi}{2}$ ] == 0,
    g1[0] == 0}, g1, {y, 0,  $\frac{\pi}{2}$ }], 1, 1] &;
```

### Plot of the solution for Flow1, Flow2 and Flow3

```
Ploth1[ $\mu$ _] := Module[{R1, R2, R3},
  R1 = h1p[ $\mu$ , Flow1];
  R2 = h1p[ $\mu$ , Flow2];
  R3 = h1p[ $\mu$ , Flow3];
  {Plot[h1[x] /. R1, {x, 0,  $\pi$ ]}, Plot[h1[x] /. R2, {x, 0,  $\pi$ ]},
  Plot[h1[x] /. R3, {x, 0,  $\pi$ }]}
```

Following line produces dynamic plot of h1[y] (slow)

```
DynamicModule[{z = 0.},
  {Slider[Dynamic[z], {-2, 2}], Dynamic[ $10^z$ ], Dynamic[Ploth1[ $10^z$ ]]}]
```

- plot cell for printing
- Plots the functions h1 and g1 for the three selected flows and as a function of  $\mu$

Plot h1

```
GraphicsGrid[{Plot1[0.01]}]
```

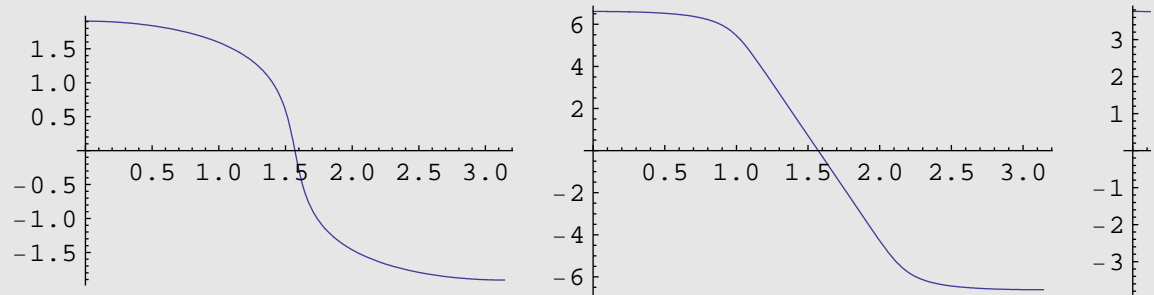

```
h10[μ_, Flow_] := h1[0] /. h1p[μ, Flow];
```

Notice that  $h1[0]$  increases as  $-\log[\mu]$  pour Flow1 et Flow3 et en puissance de  $\mu$  pour Flow2

Plot now  $h1[0]$  as a function of  $\mu$

```
{LogLinearPlot[h10[m, Flow1], {m, 0.0001, 1.}],  
LogLogPlot[h10[m, Flow2], {m, 0.0001, 1.}],  
LogLinearPlot[h10[m, Flow3], {m, 0.0001, 1.}]}
```

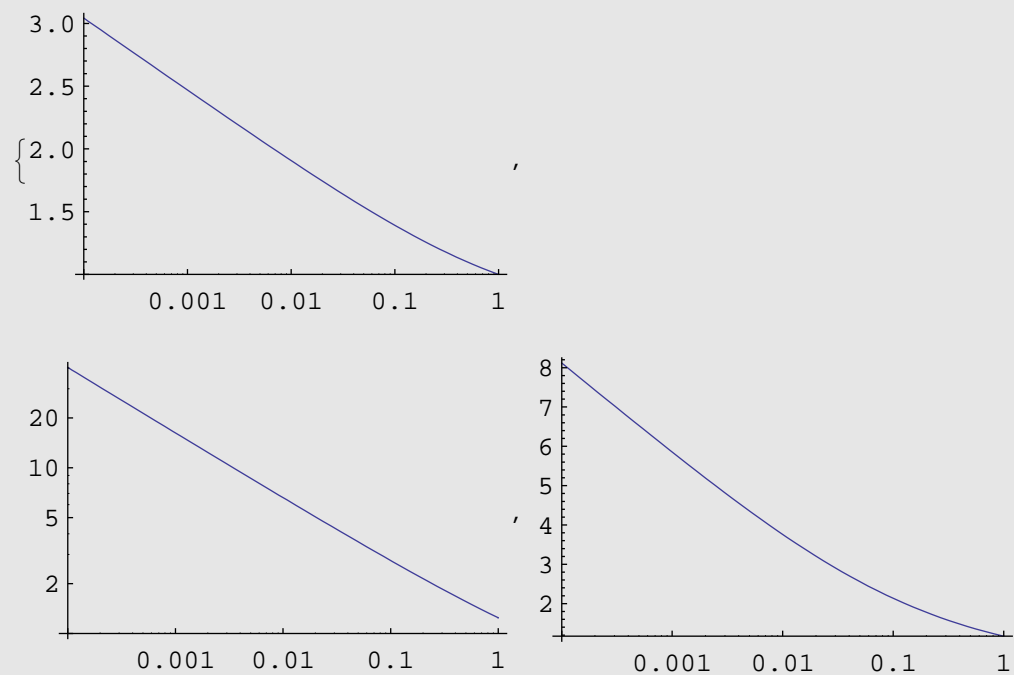

Following line produces dynamic plot of  $g1[y]$  (slow)

```
DynamicModule[{z = 0.},  
{slider[Dynamic[z], {-2, 2}], Dynamic[10^z], Dynamic[Plotg1[10^z]]}]
```

Plotg1[0.000001]

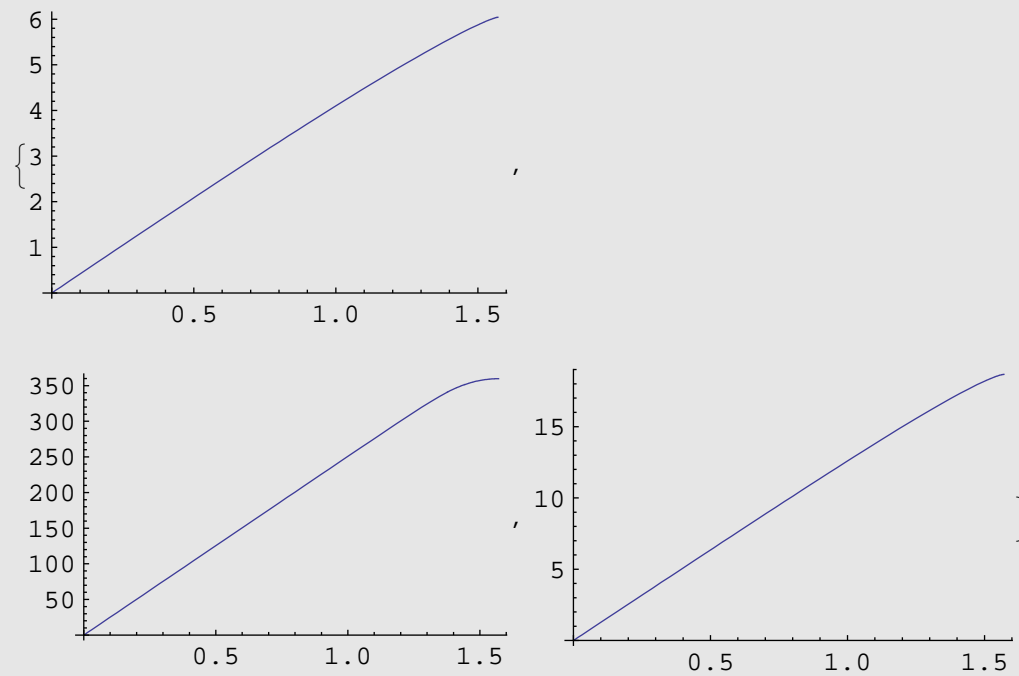

## ■ Produce printing plots

# Solution to the second order perturbation problem for f2b

## Generation of the source functions

$$\text{Src2b1} = \frac{(\mu \sin[\theta[y]]^2 + 2 \cos[\theta[y]]^2 \theta'[y]^2)}{\sqrt{\mu \sin[\theta[y]]^2 + \cos[\theta[y]]^2 \theta'[y]^2}};$$

$$\text{Src2b2} = \sin[\theta[y]] g1'[y] - \cos[\theta[y]] \theta'[y] g1[y];$$

$$\text{Src2b3} = \sin[\theta[y]] g1'[y] \theta'[y]^2 + \cos[\theta[y]] (\theta'[y] g1''[y] - \theta''[y] g1'[y]);$$

The problem to be solved at this order is

$$L0(f2b) = \partial_{y^2} \text{Src2b1} + \frac{1}{C} \partial_y \text{Src2b2} + \frac{D}{C} \partial_y \text{Src2b3}$$

Notice that Src2b2 and Src2b3 vanish for Flow1 and  $\mu = 1$ , when  $\theta[y] = y$  and  $g1[y] = \sin[y]$

## ■ Plot of the source term

## Solution using NDSolve

The solution is

$$f2b = g2b1 + \frac{1}{C} g2b2 + \frac{D}{C} g2b3$$

Since only the derivative of f2b is needed to get the amplitude equation, we define and calculate

$$h2b1 = g2b1', \quad h2b2 = g2b2', \quad h2b3 = g2b3'$$

## ■ Solution of the problem for h2b1 and g2b1

Solution for h2b1 with an auxilliary integration constant K such that the solvability condition and the boundary conditions are satisfied

The integration constant appears here because h2b1 has Sin 2 y symmetry resulting in a constant contribution by the product with Trb

```
h2b1p =
Part[NDSolve[{L2d[h2b1[y], #1] == Src2b1 - K[y] /. {#2, μ → #1},
  K'[y] == 0, h2b1[0] == 0, h2b1[π/2] == 0}, {h2b1, K}, {y, 0, π/2}],
  1, 1] &;
```

This provides directly g2b1 with the trick that g2b1 is the derivative of a function with same symmetries as h2b1 in order to impose the solvability condition in a way that NDSolve understands

```
mgg2b1 =
Part[NDSolve[{L2d[g2b1'[y], #1] == Src2b1 - K[y] /. {#2, μ → #1},
  K'[y] == 0, g2b1'[0] == 0, g2b1'[π/2] == 0, IG'[y] == g2b1[y],
  IG[0] == 0, IG[π/2] == 0}, {g2b1, K, IG}, {y, 0, π/2}], 1, 1] &;
```

### ■ Plot of the solution for h2b1 and g2b1

```

Ploth2b1[μ0_] := Module[{R1, R2, R3},
  R1 = h2b1p[μ0, Flow1];
  R2 = h2b1p[μ0, Flow2];
  R3 = h2b1p[μ0, Flow3];
  {Plot[h2b1[y] /. R1, {y, 0,  $\frac{\pi}{2}$ }}, Plot[h2b1[y] /. R2, {y, 0,  $\frac{\pi}{2}$ }},
  Plot[h2b1[y] /. R3, {y, 0,  $\frac{\pi}{2}$ }}]

```

```

Plotg2b1[μ0_] := Module[{R1, R2, R3},
  R1 = mgg2b1[μ0, Flow1];
  R2 = mgg2b1[μ0, Flow2];
  R3 = mgg2b1[μ0, Flow3];
  {Plot[g2b1[y] /. R1, {y, 0,  $\frac{\pi}{2}$ }}, Plot[g2b1[y] /. R2, {y, 0,  $\frac{\pi}{2}$ }},
  Plot[g2b1[y] /. R3, {y, 0,  $\frac{\pi}{2}$ }}]

```

Following line produces dynamic plot of the solution (very slow)

```

DynamicModule[{z = 0.},
  {Slider[Dynamic[z], {-2, 2}], Dynamic[10z], Dynamic[Plotg2b1[10z]]}]

```

PlotH2b1[0.001]

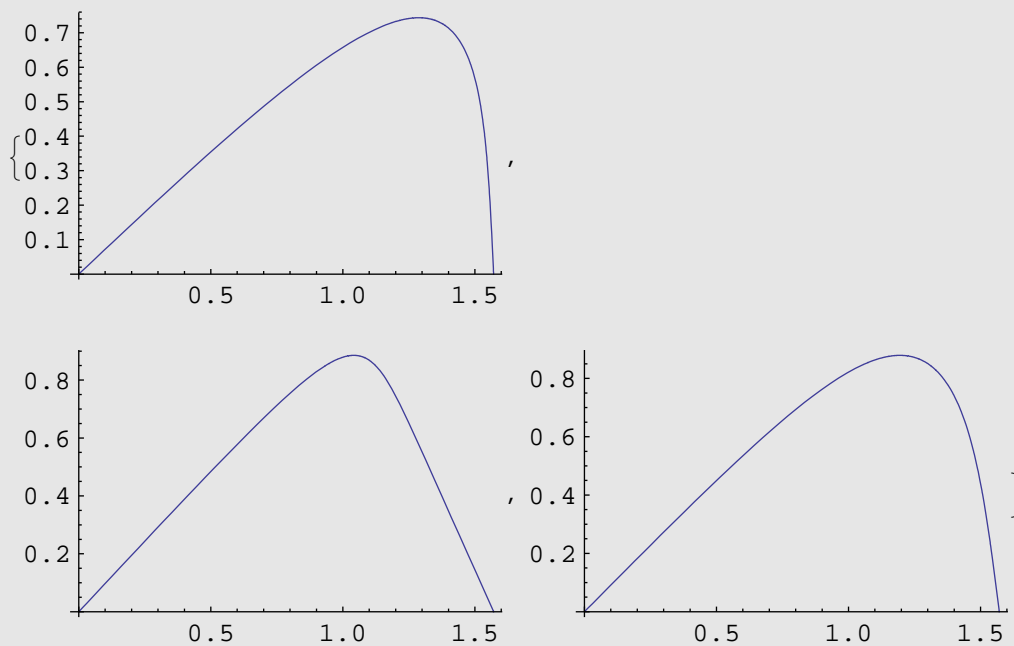

PlotG2b1[0.5]

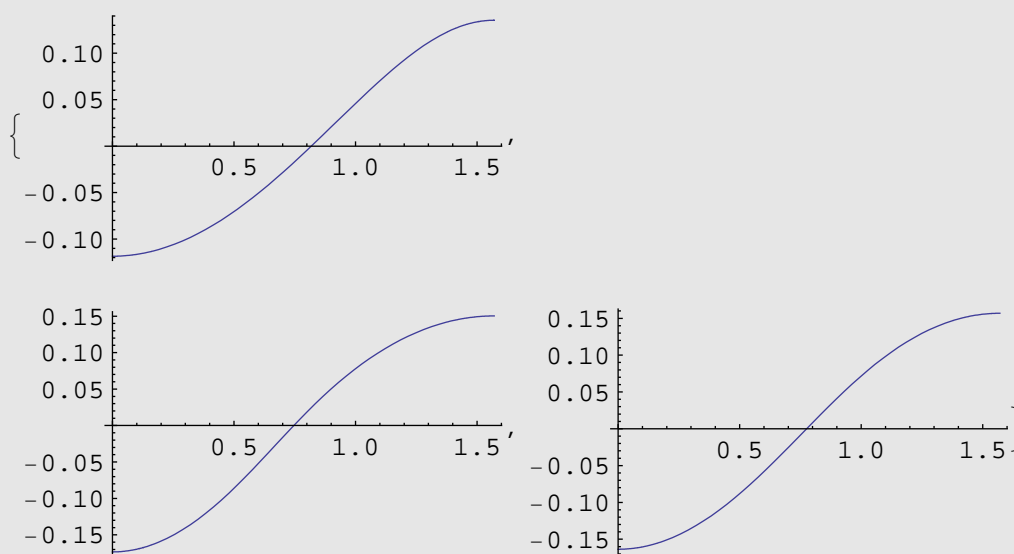

### ■ Verification against the case $\mu = 1, \theta[y] \neq y$

### ■ Solution for h2b2 and g2b2

Because there is only one derivative in front of  $Scr_{2b2}$ , we solve the linear operator  $L1d$  and we do not need to introduce an integration constant here



```
h2b2p =
Part[NDSolve[{L1d[h2b2[y], #1] == Src2b2 /. mgg1[#1, #2] /. #2,
h2b2[0] == 0, h2b2[ $\frac{\pi}{2}$ ] == 0}, h2b2, {y, 0,  $\frac{\pi}{2}$ }, 1, 1] &;
```

```
mgg2b2 =
Part[NDSolve[{L1d[g2b2'[y], #1] == Src2b2 /. mgg1[#1, #2] /. #2,
g2b2'[0] == 0, g2b2'[ $\frac{\pi}{2}$ ] == 0, IG'[y] == g2b2[y], IG[0] == 0,
IG[ $\frac{\pi}{2}$ ] == 0}, {g2b2, IG}, {y, 0,  $\frac{\pi}{2}$ }, 1, 1] &;
```

### ■ Plot of the solution for h2b2 and g2b2

### ■ Solution for h2b3 and g2b3

Again, because there is only one derivative in front of Src2b2, we solve the linear operator L1d and we do not need to introduce an integration constant here

```
h2b3p =
Part[NDSolve[{L1d[h2b3[y], #1] == Src2b3 /. mgg1[#1, #2] /. #2,
h2b3[0] == 0, h2b3[ $\frac{\pi}{2}$ ] == 0}, h2b3, {y, 0,  $\frac{\pi}{2}$ }, 1, 1] &;
```

```
mgg2b3 =
Part[NDSolve[{L1d[g2b3'[y], #1] == Src2b3 /. mgg1[#1, #2] /. #2,
g2b3'[0] == 0, g2b3'[ $\frac{\pi}{2}$ ] == 0, IG'[y] == g2b3[y], IG[0] == 0,
IG[ $\frac{\pi}{2}$ ] == 0}, {g2b3, IG}, {y, 0,  $\frac{\pi}{2}$ }, 1, 1] &;
```

### ■ Plot of the solution for h2b3 and g2b3

## Contributions to the turbulent viscosity

### Contribution of the zero and first order terms

- Term in  $\langle \frac{(\mu \sin[\theta[y]]^2 + 2 \cos[\theta[y]]^2 \theta'[y]^2)}{\sqrt{\mu \sin[\theta[y]]^2 + \cos[\theta[y]]^2 \theta'[y]^2}} \rangle$ , in factor of  $A C$

$$I1[\mu_, Flow_] := \frac{2}{\pi} \text{NIntegrate}\left[\text{Tra}[\mu] /. Flow, \{y, 0, \frac{\pi}{2}\}\right]$$

- How does it look and example

- Term in  $\langle g1[y] \sin[\theta[y]] \rangle$ , in factor of  $-\frac{A}{C}$

$$I2[\mu_, Flow_] := \frac{2}{\pi} \text{NIntegrate}\left[g1[y] \sin[\theta[y]] /. \text{mgg1}[\mu, Flow] /. Flow, \{y, 0, \frac{\pi}{2}\}\right]$$

- How does it look and example

- Term in  $\langle g1'[y] \cos[\theta[y]] \theta'[y] \rangle$ , in factor of  $-\frac{AD}{C}$

$$I3[\mu_, Flow_] := \frac{2}{\pi} \text{NIntegrate}\left[g1'[y] \cos[\theta[y]] \theta'[y] /. \text{mgg1}[\mu, Flow] /. Flow, \{y, 0, \frac{\pi}{2}\}\right]$$

- How does it look and example

### Definition : the famous function G

$$\begin{aligned}
 G[y_, \mu_, Flow_] := & \\
 & 2 \theta'[y] \cos[\theta[y]] \\
 & \left( \frac{-\sin[\theta[y]] \theta'[y]^2}{\sqrt{\mu \sin[\theta[y]]^2 + \cos[\theta[y]]^2 \theta'[y]^2}} + \right. \\
 & \frac{1}{2 \left( \mu \sin[\theta[y]]^2 + \cos[\theta[y]]^2 \theta'[y]^2 \right)^{3/2}} \\
 & \left( 3 \mu \theta''[y] \sin[\theta[y]]^2 \cos[\theta[y]] - \mu \theta'[y]^2 \sin[\theta[y]] + \right. \\
 & \left. \left. 2 \theta'[y]^2 \theta''[y] \cos[\theta[y]]^3 \right) \right) /. Flow
 \end{aligned}$$

One can easily check that this expression is identical to the following one,

$$\begin{aligned}
 & \frac{1}{\left( \mu \sin[\theta[y]]^2 + \cos[\theta[y]]^2 \theta'[y]^2 \right)^{3/2}} \left( \cos[\theta[y]] \theta'[y] \right. \\
 & \left. \left( -\sin[\theta[y]] \theta'[y]^2 \left( \mu + 2 \mu \sin[\theta[y]]^2 + 2 \cos[\theta[y]]^2 \theta'[y]^2 \right) + \right. \right. \\
 & \left. \left. \cos[\theta[y]] \left( 3 \mu \sin[\theta[y]]^2 + 2 \cos[\theta[y]]^2 \theta'[y]^2 \right) \theta''[y] \right) \right)
 \end{aligned}$$

or this one taken from CH - eff1 - nu - 8.m6.nb

$$\begin{aligned}
 & \left( \cos[\theta[y]] \theta'[y] \right. \\
 & \left. \left( -2 \cos[\theta[y]]^2 \sin[\theta[y]] \theta'[y]^4 + 3 \mu \cos[\theta[y]] \sin[\theta[y]]^2 \theta''[y] - \right. \right. \\
 & \left. \left. \theta'[y]^2 \left( \mu \left( \sin[\theta[y]] + 2 \sin[\theta[y]]^3 \right) - 2 \cos[\theta[y]]^3 \theta''[y] \right) \right) \right) / \\
 & \left( \mu \sin[\theta[y]]^2 + \cos[\theta[y]]^2 \theta'[y]^2 \right)^{3/2}
 \end{aligned}$$

or this one in the paper

$$\begin{aligned}
 & \frac{1}{2 \left( \mu \sin[\theta[y]]^2 + \cos[\theta[y]]^2 \theta'[y]^2 \right)^{3/2}} \\
 & \left( \mathcal{D}[\mathcal{D}[\sin[\theta[y]], y]^4, y] + \mu \mathcal{D}[\sin[\theta[y]]^2, y] \right. \\
 & \left. \left( 3 \sin[\theta[y]] \mathcal{D}[\sin[\theta[y]], \{y, 2\}] - \mathcal{D}[\sin[\theta[y]], y]^2 \right) \right)
 \end{aligned}$$

### ■ Plots

## Contribution of the terms in f2b

- Contribution  $\langle h2b1[y] G[y] \rangle$ , in factor of  $2 \frac{A}{C}$

```
Ib1[μ_, Flow_] :=
  2
  π NIntegrate[h2b1[y] G[y, μ, Flow] /. Evaluate[h2b1p[μ, Flow]],
    {y, 0, π/2}]
```

- How does it look and example

- Contribution  $\langle h2b2[y] G[y] \rangle$ , in factor of  $2 A C$

```
Ib2[μ_, Flow_] :=
  2
  π NIntegrate[h2b2[y] G[y, μ, Flow] /. Evaluate[h2b2p[μ, Flow]],
    {y, 0, π/2}]
```

- How does it look and example

- Contribution  $\langle h2b3[y] G[y] \rangle$ , in factor of  $2 A D$

```
Ib3[μ_, Flow_] :=
  2
  π NIntegrate[h2b3[y] G[y, μ, Flow] /. Evaluate[h2b3p[μ, Flow]],
    {y, 0, π/2}]
```

- How does it look and example

## Large-scale instability

The turbulent viscosity  $\nu_T$  is such that

$$\begin{aligned} \frac{1}{A} \nu_T &= \frac{1}{C} (-I_2 + Ib_2) + C (I_1 + Ib_1) + \frac{D}{C} (-I_3 + Ib_3) \\ &= \Delta^2 C_s (C_s (I_1 + Ib_1)) + \frac{1}{12 C_s} (Ib_3 - I_3) + \frac{1}{C_s \Delta^2} (-I_2 + Ib_2) \end{aligned}$$

## Verifications with respect to the analytical case for Flow1 and $\mu = 1$

### Definitions

$$\begin{aligned} B1[\mu_, \text{Flow}_] &:= I1[\mu, \text{Flow}] + Ib1[\mu, \text{Flow}] \\ B2[\mu_, \text{Flow}_] &:= -I2[\mu, \text{Flow}] + Ib2[\mu, \text{Flow}] \\ B3[\mu_, \text{Flow}_] &:= \frac{-I3[\mu, \text{Flow}] + Ib3[\mu, \text{Flow}]}{12} \end{aligned}$$

$$DD[\mu_, \text{Flow}_] := B3[\mu, \text{Flow}]^2 - 4 \text{Cs}^2 B1[\mu, \text{Flow}] B2[\mu, \text{Flow}] /. \text{Cs} \rightarrow 0.008;$$

$$\Gamma c[\mu_, \text{Flow}_] := \sqrt{\frac{-B3[\mu, \text{Flow}] + \sqrt{DD[\mu, \text{Flow}]}}{2 \text{Cs}^2 B1[\mu, \text{Flow}]}} /. \text{Cs} \rightarrow 0.008;$$

### Plots

#### ■ Plots with lists

Make a logarithmic sample of  $\mu$  values

```
fac = 101/5;
μramp = Table[0.001 faci-1, {i, 1, 31}];
```

Plot integrals I1, I2 and I3 as a function of  $\mu$  and Flow

```
GraphicsGrid[
  {{ListLogLinearPlot[Transpose[{ $\mu$ ramp, Map[I1[#, Flow1] &,  $\mu$ ramp]}],
    Joined → True],
    ListLogLinearPlot[Transpose[{ $\mu$ ramp, Map[I1[#, Flow2] &,  $\mu$ ramp]}],
    Joined → True],
    ListLogLinearPlot[Transpose[{ $\mu$ ramp, Map[I1[#, Flow3] &,  $\mu$ ramp]}],
    Joined → True]},
  {ListLogLinearPlot[Transpose[{ $\mu$ ramp, Map[I2[#, Flow1] &,  $\mu$ ramp]}],
    Joined → True],
    ListLogLinearPlot[Transpose[{ $\mu$ ramp, Map[I2[#, Flow2] &,  $\mu$ ramp]}],
    Joined → True],
    ListLogLinearPlot[Transpose[{ $\mu$ ramp, Map[I2[#, Flow3] &,  $\mu$ ramp]}],
    Joined → True]},
  {ListLogLinearPlot[Transpose[{ $\mu$ ramp, Map[I3[#, Flow1] &,  $\mu$ ramp]}],
    Joined → True],
    ListLogLinearPlot[Transpose[{ $\mu$ ramp, Map[I3[#, Flow2] &,  $\mu$ ramp]}],
    Joined → True],
    ListLogLinearPlot[Transpose[{ $\mu$ ramp, Map[I3[#, Flow3] &,  $\mu$ ramp]}],
    Joined → True]}}
```

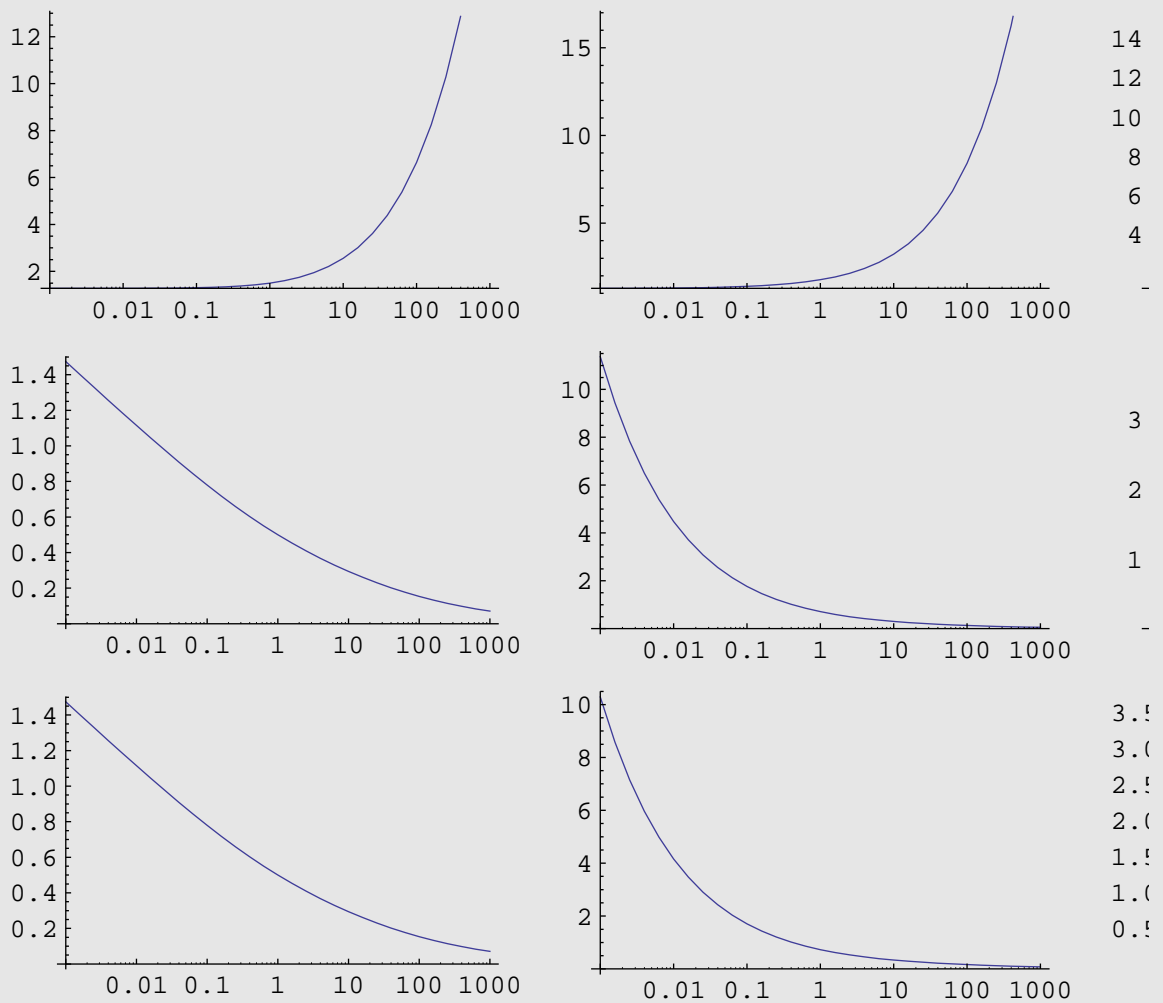

Plot integrals  $I_{b1}$ ,  $I_{b2}$  and  $I_{b3}$  as a function of  $\mu$  and Flow

```
{ {ListLogLinearPlot[Transpose[{ $\mu$ ramp, Map[Ib1[#, Flow1] &,  $\mu$ ramp]}],  
  Joined  $\rightarrow$  True],  
  ListLogLinearPlot[Transpose[{ $\mu$ ramp, Map[Ib1[#, Flow2] &,  $\mu$ ramp]}],  
    Joined  $\rightarrow$  True],  
  ListLogLinearPlot[Transpose[{ $\mu$ ramp, Map[Ib1[#, Flow2] &,  $\mu$ ramp]}],  
    Joined  $\rightarrow$  True]}],  
{ListLogLinearPlot[Transpose[{ $\mu$ ramp, Map[Ib2[#, Flow1] &,  $\mu$ ramp]}],  
  Joined  $\rightarrow$  True],  
  ListLogLinearPlot[Transpose[{ $\mu$ ramp, Map[Ib2[#, Flow2] &,  $\mu$ ramp]}],  
    Joined  $\rightarrow$  True],  
  ListLogLinearPlot[Transpose[{ $\mu$ ramp, Map[Ib2[#, Flow3] &,  $\mu$ ramp]}],  
    Joined  $\rightarrow$  True]}],  
{ListLogLinearPlot[Transpose[{ $\mu$ ramp, Map[Ib3[#, Flow1] &,  $\mu$ ramp]}],  
  Joined  $\rightarrow$  True],  
  ListLogLinearPlot[Transpose[{ $\mu$ ramp, Map[Ib3[#, Flow2] &,  $\mu$ ramp]}],  
    Joined  $\rightarrow$  True],  
  ListLogLinearPlot[Transpose[{ $\mu$ ramp, Map[Ib3[#, Flow3] &,  $\mu$ ramp]}],  
    Joined  $\rightarrow$  True]}}
```

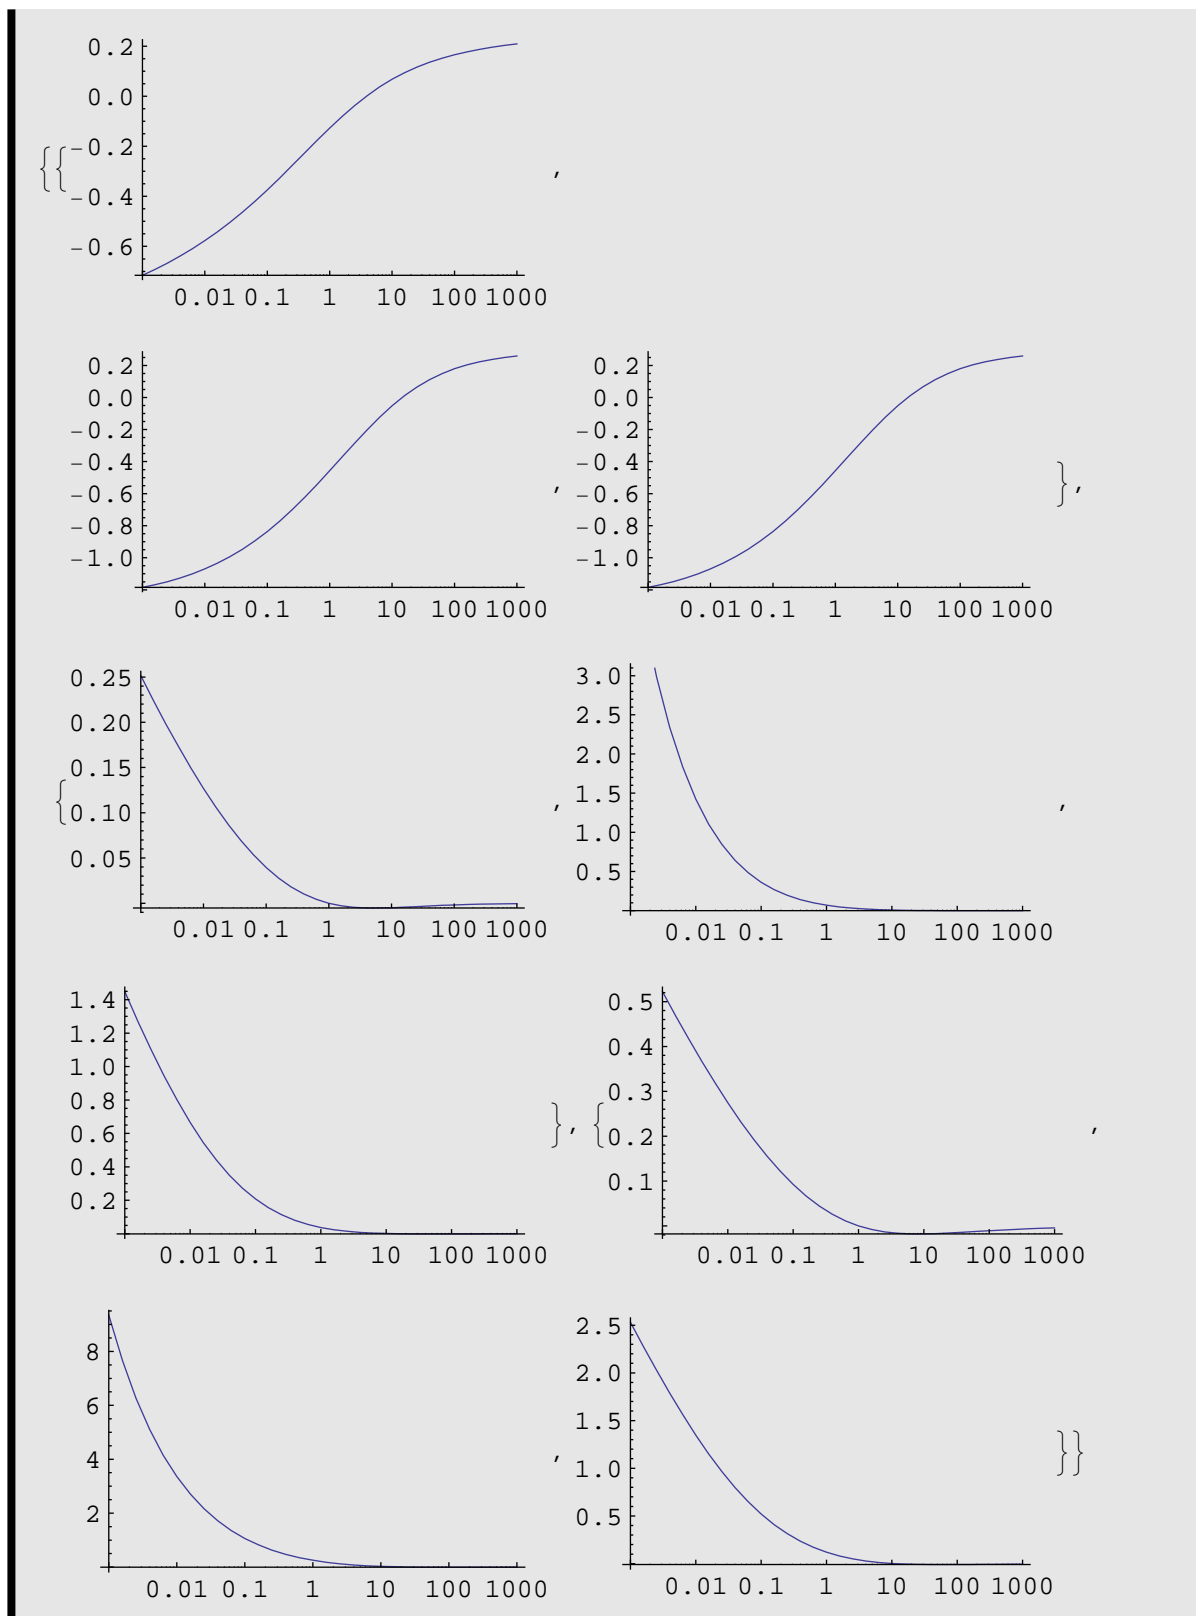

Plot integrals B1, B2 and B3 as a function of  $\mu$  and Flow



```
{ {ListLogLinearPlot[Transpose[{ $\mu$ ramp, Map[B1[#, Flow1] &,  $\mu$ ramp]}],  
  Joined  $\rightarrow$  True],  
  ListLogLinearPlot[Transpose[{ $\mu$ ramp, Map[B1[#, Flow2] &,  $\mu$ ramp]}],  
    Joined  $\rightarrow$  True],  
  ListLogLinearPlot[Transpose[{ $\mu$ ramp, Map[B1[#, Flow2] &,  $\mu$ ramp]}],  
    Joined  $\rightarrow$  True]}],  
{ListLogLinearPlot[Transpose[{ $\mu$ ramp, Map[B2[#, Flow1] &,  $\mu$ ramp]}],  
  Joined  $\rightarrow$  True],  
  ListLogLinearPlot[Transpose[{ $\mu$ ramp, Map[B2[#, Flow2] &,  $\mu$ ramp]}],  
    Joined  $\rightarrow$  True],  
  ListLogLinearPlot[Transpose[{ $\mu$ ramp, Map[B2[#, Flow3] &,  $\mu$ ramp]}],  
    Joined  $\rightarrow$  True]}],  
{ListLogLinearPlot[Transpose[{ $\mu$ ramp, Map[B3[#, Flow1] &,  $\mu$ ramp]}],  
  Joined  $\rightarrow$  True],  
  ListLogLinearPlot[Transpose[{ $\mu$ ramp, Map[B3[#, Flow2] &,  $\mu$ ramp]}],  
    Joined  $\rightarrow$  True],  
  ListLogLinearPlot[Transpose[{ $\mu$ ramp, Map[B3[#, Flow3] &,  $\mu$ ramp]}],  
    Joined  $\rightarrow$  True]}}
```

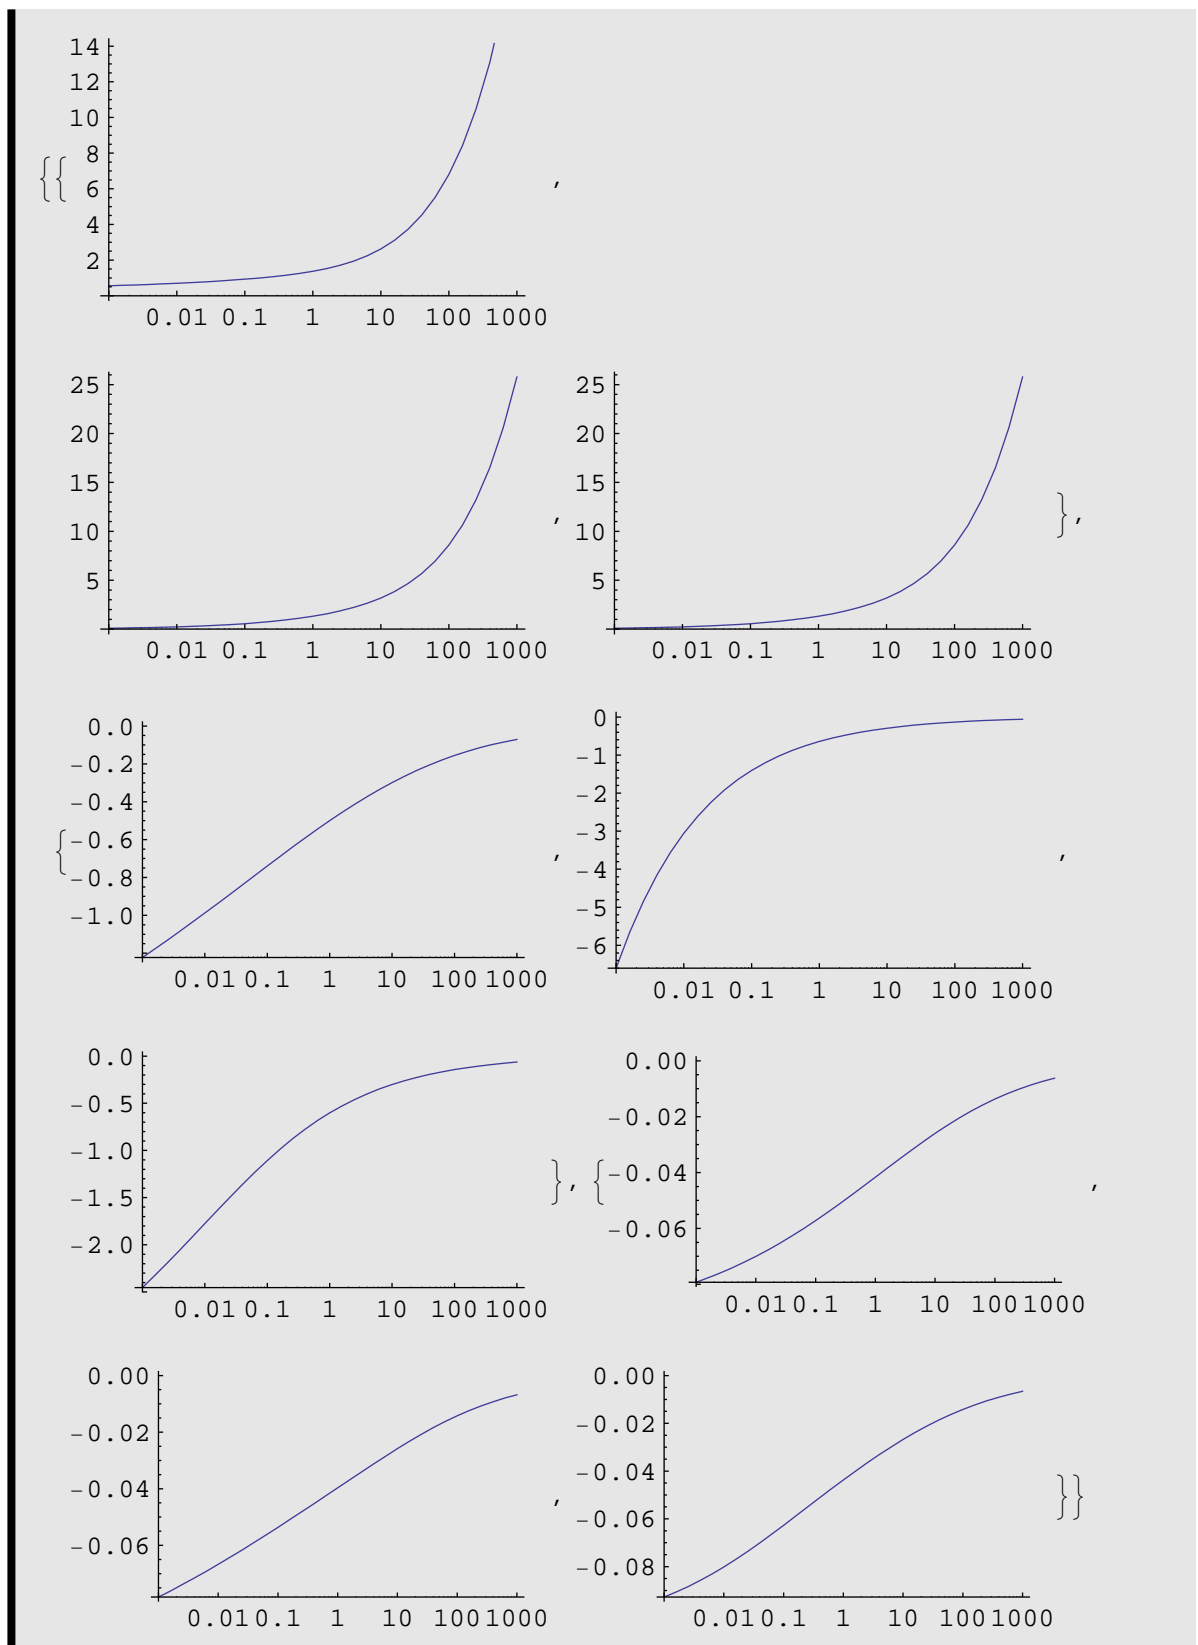

Plot the discriminant as a function of  $\mu$  and Flow

```
{ListLogLinearPlot[Transpose[{ $\mu$ ramp, Map[DD[#, Flow1] &,  $\mu$ ramp]}],
  Joined → True],
 ListLogLinearPlot[Transpose[{ $\mu$ ramp, Map[DD[#, Flow2] &,  $\mu$ ramp]}],
  Joined → True],
 ListLogLinearPlot[Transpose[{ $\mu$ ramp, Map[DD[#, Flow3] &,  $\mu$ ramp]}],
  Joined → True]}
```

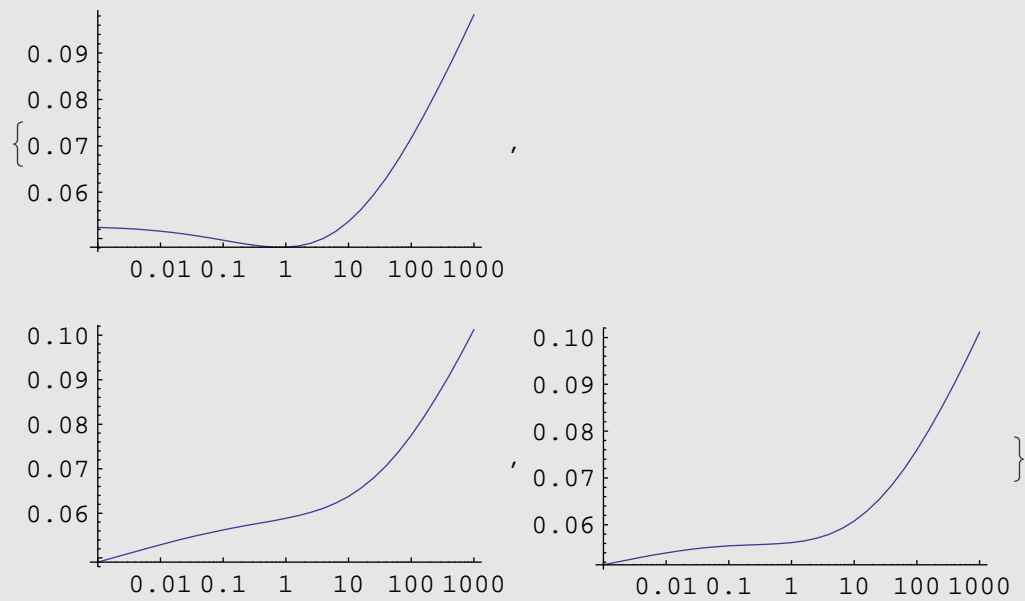

Plot the critical length as a function of  $\mu$  and Flow

```
{ListLogLinearPlot[Transpose[{ $\mu$ ramp, Map[ $\Gamma$ c[#, Flow1] &,  $\mu$ ramp]}],
  Joined  $\rightarrow$  True],
 ListLogLinearPlot[Transpose[{ $\mu$ ramp, Map[ $\Gamma$ c[#, Flow2] &,  $\mu$ ramp]}],
  Joined  $\rightarrow$  True],
 ListLogLinearPlot[Transpose[{ $\mu$ ramp, Map[ $\Gamma$ c[#, Flow3] &,  $\mu$ ramp]}],
  Joined  $\rightarrow$  True]}
```

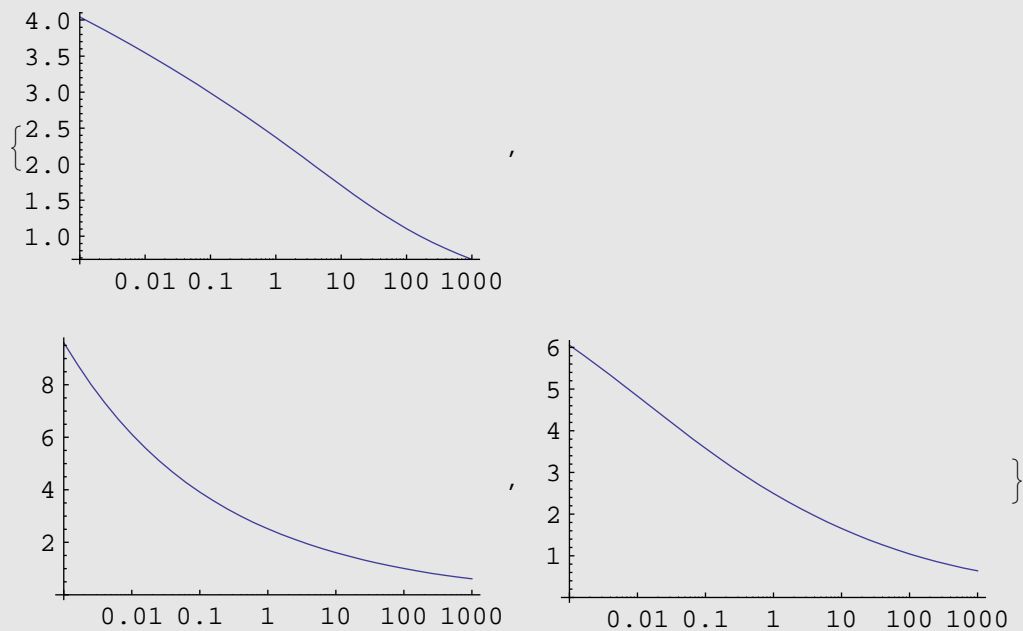

## ■ Produce printing plots

```
q1 = Map[ $\Gamma$ c[#, Flow1] &,  $\mu$ ramp];
q2 = Map[ $\Gamma$ c[#, Flow2] &,  $\mu$ ramp];
q3 = Map[ $\Gamma$ c[#, Flow3] &,  $\mu$ ramp];
```

Let us print to make plots at a later stage

q1  
q2  
q3

```
{47.2826, 45.8484, 44.3773, 42.8678, 41.3195, 39.7324, 38.1069, 36.4441,
 34.7459, 33.0145, 31.2519, 29.4605, 27.6419, 25.7978, 23.9306,
 22.0449, 20.1497, 18.2601, 16.3985, 14.593, 12.8743, 11.2715, 9.80784,
 8.49761, 7.3455, 6.34741, 5.4924, 4.7653, 4.14908, 3.62683, 3.18299}
```

```
{113.202, 102.06, 91.9566, 82.7999, 74.5048, 66.9947, 60.1986, 54.0523,
 48.4967, 43.4771, 38.9432, 34.8483, 31.1493, 27.8059, 24.7811, 22.0413,
 19.5566, 17.3013, 15.2543, 13.3991, 11.7234, 10.2183, 8.87684, 7.69208,
 6.65604, 5.75865, 4.98769, 4.32932, 3.76902, 3.29253, 2.88669}
```

```
{75.0683, 71.4809, 67.806, 64.0572, 60.2541, 56.4218, 52.5903, 48.7927,
 45.0629, 41.4328, 37.9308, 34.5799, 31.3964, 28.3906, 25.5667, 22.9248,
 20.4624, 18.1758, 16.0622, 14.1201, 12.3494, 10.7504, 9.32244, 8.06231,
 6.96328, 6.01488, 5.20341, 4.51315, 3.92768, 3.43108, 3.00886}
```

```
ListLogLinearPlot[{Transpose[{μramp, q1}], Transpose[{μramp, q2}],
  Transpose[{μramp, q3}]], Joined → True,
 PlotStyle → {{Black, Thick}, {Black, Thick, Dashed},
  {Black, Thick, Dotted}},
 AxesLabel → {ToExpression["μ", TeXForm],
  ToExpression["Γc", TeXForm]}]
```

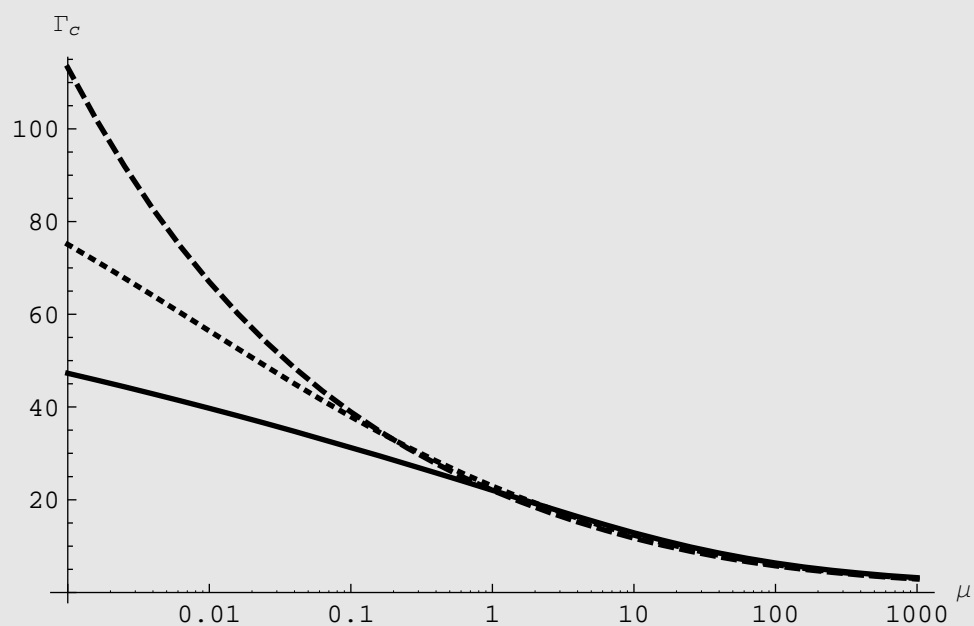

Supplement: Supplementary file 4 [file npg-16-569-2009-supplement.zip]
