# Supplementary material for: Large-scale instability of a generalized turbulent Kolmogorov flow
Source: Copernicus journal article supplement (doi:10.5194/npg-16-569-2009), 2009-08-31
Supplement: Supplementary file 1 [file npg-16-569-2009-supplement.zip]

# Large-scale linear instability of the generalized Kolmogorov flow - hyperviscous version with a general parallel flow

Bernard Legras  
 Laboratoire de Meteorologie Dynamique  
 Ecole Normale Supérieure  
 24 rue Lhomond  
 F-75231 PARIS Cedex 05  
 E-mail: legras@lmd.ens.fr  
 Barbara Villone  
 Istituto di Fisica dello Spazio Interplanetario  
 Corso Fiume, 4  
 I-10137 TORINO  
 E-mail: villone@to.infn.it

$U$  of any shape,  
 periodic within the interval  $[0, 2\pi]$   
 with the condition that  $\int_0^{2\pi} U[y] dy = 0$   
 Streamfunction defined as  $u = \partial_y \psi$ ,  $v = -\partial_x \psi$

## Settings

### ■ Last use

```
DateList[]  
  
{2009, 1, 22, 12, 49, 31.310386}
```

## ■ General

```
Off[General::spell1]
```

## ■ Laplacian

```

$$\Delta = - \left( \epsilon^2 \partial_{x,x} \# + \partial_{y,y} \# \right) \&$$


$$- \left( \epsilon^2 \partial_{x,x} \#1 + \partial_{y,y} \#1 \right) \&$$

```

Beware of the sign in the definition

## ■ Definition of the dissipation

Hyperviscosity

```
DS = - \nu \Delta[\Delta[\Delta[\#]]] \&
- \nu \Delta[\Delta[\Delta[\#1]]] \&
```

# Definition of the modified Kolmogorov Flow

## ■ Velocity and streamfunction

```
 $\Phi[y_] := \text{Integrate}\left[U[s], \left\{s, \frac{\pi}{2}, y\right\}\right]$ 
```

## ■ Exemples of flows

Standard Kolmogorov flow in Flow1

```
Flow2 = U → Evaluate[Sin[# +  $\frac{1}{2}$  Sin[2 #]] &];
Flow1 = U → Evaluate[Sin[#] &];
Flow3 = U → Evaluate[Sin[# +  $\frac{1}{4}$  Sin[2 #]] &];
```

## ■ Plots of the flow

```
{Plot[U[y] /. {Flow1, A → 1}, {y, -2 π, 2 π}],  
Plot[U[y] /. {Flow2, A → 1}, {y, -2 π, 2 π}],  
Plot[U[y] /. {Flow3, A → 1}, {y, -2 π, 2 π}]}
```

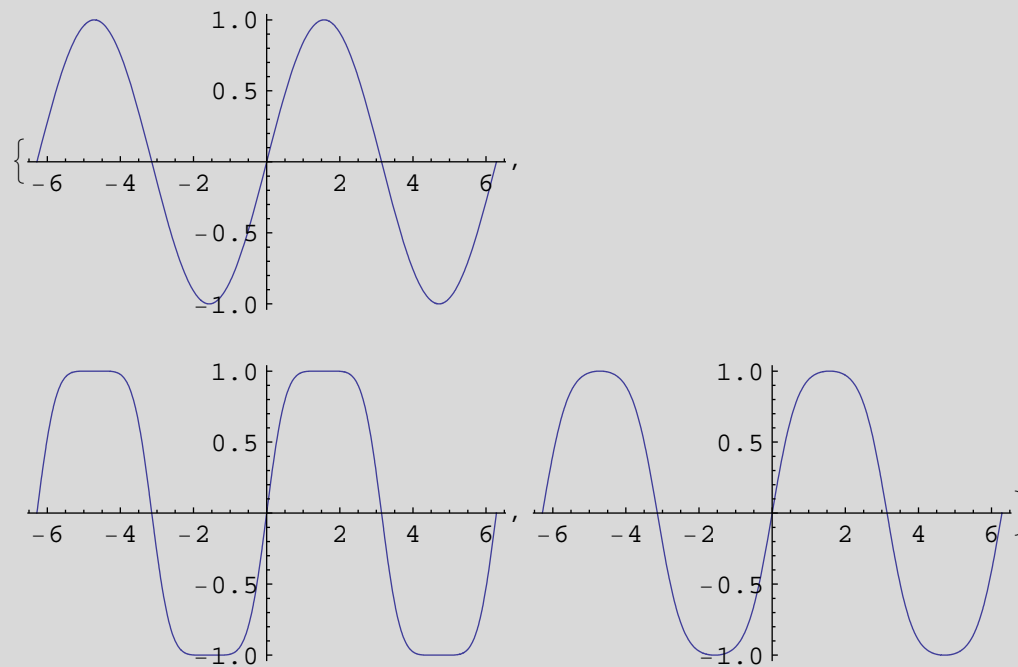

## ■ Plots of the streamfunction

```

ϕ1 = NIntegrate[Evaluate[U[y] /. {Flow1, A → 1}], {y,  $\frac{\pi}{2}$ , #}] &;
ϕ2 = NIntegrate[Evaluate[U[y] /. {Flow2, A → 1}], {y,  $\frac{\pi}{2}$ , #}] &;
ϕ3 = NIntegrate[Evaluate[U[y] /. {Flow3, A → 1}], {y,  $\frac{\pi}{2}$ , #}] &;
{Plot[ϕ1[u], {u, -2 π, 2 π}],
 Plot[ϕ2[u], {u, -2 π, 2 π}],
 Plot[ϕ3[u], {u, -2 π, 2 π}]}

```

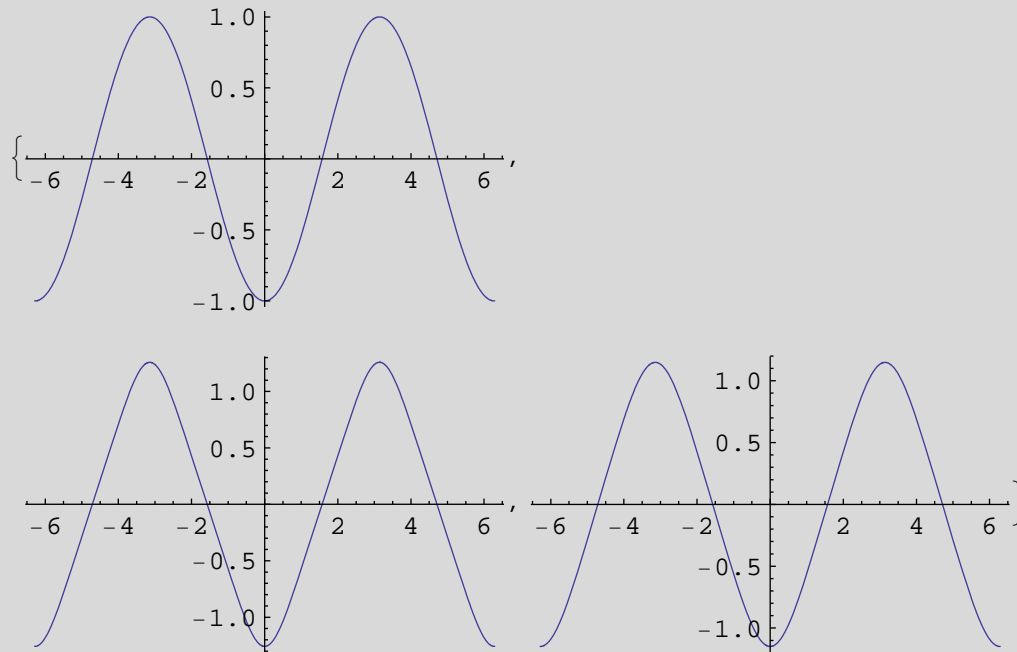

## ■ Plots of the third primitive of the velocity

```

ξ1sol = NDSolve[{D[ξ1[y], {y, 3}] == U[y] /. {Flow1, A → 1},
  ξ1[ $\frac{\pi}{2}$ ] == 0, ξ1''[ $\frac{\pi}{2}$ ] == 0, ξ1'[0] == 0}, ξ1, {y, -2 π, 2 π}];
ξ2sol = NDSolve[{D[ξ2[y], {y, 3}] == U[y] /. {Flow2, A → 1},
  ξ2[ $\frac{\pi}{2}$ ] == 0, ξ2''[ $\frac{\pi}{2}$ ] == 0, ξ2'[0] == 0}, ξ2, {y, -2 π, 2 π}];
ξ3sol = NDSolve[{D[ξ3[y], {y, 3}] == U[y] /. {Flow3, A → 1},
  ξ3[ $\frac{\pi}{2}$ ] == 0, ξ3''[ $\frac{\pi}{2}$ ] == 0, ξ3'[0] == 0}, ξ3, {y, -2 π, 2 π}];

```

```
{Plot[ $\xi_1[u]$  /.  $\xi_1sol$ , {u, -2  $\pi$ , 2  $\pi$ }],  
Plot[ $\xi_2[u]$  /.  $\xi_2sol$ , {u, -2  $\pi$ , 2  $\pi$ }],  
Plot[ $\xi_3[u]$  /.  $\xi_3sol$ , {u, -2  $\pi$ , 2  $\pi$ }]}
```

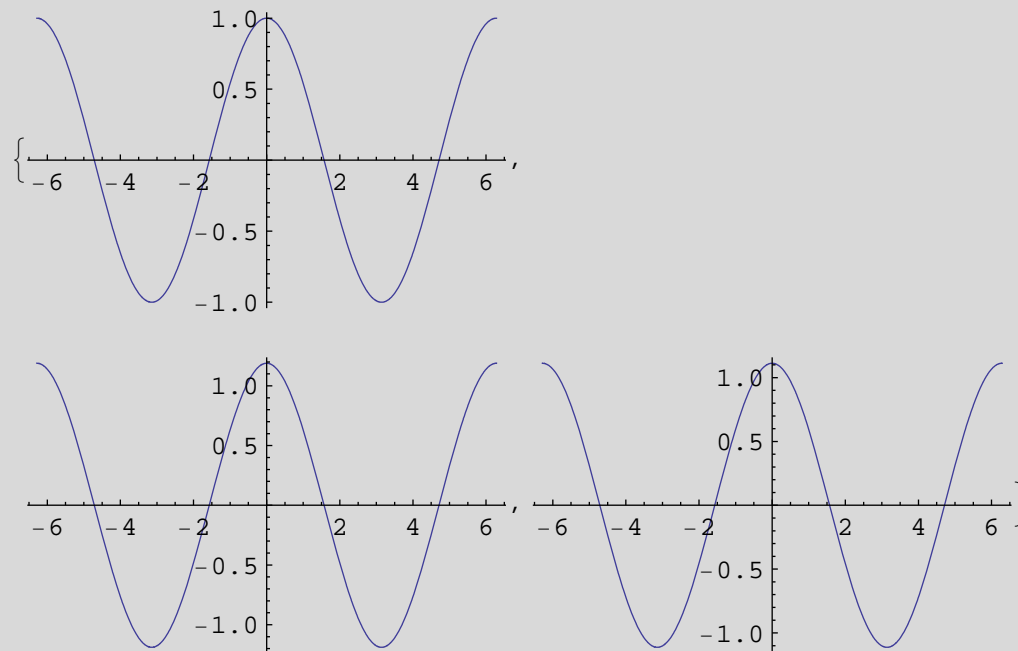

## ■ Plots of the forcing

```
Forcing = Simplify[DS[ $\Phi[y]$ ]]
```

```
 $-\nu U^{(7)}[y]$ 
```

```
{Plot[ Forcing /. {Flow1, A → 1, ν → 1},
  {y, -2 π, 2 π}, PlotRange → All],
Plot[ Forcing /. {Flow2, A → 1, ν → 1},
  {y, -2 π, 2 π}, PlotRange → All],
Plot[ Forcing /. {Flow3, A → 1, ν → 1},
  {y, -2 π, 2 π}, PlotRange → All]}
```

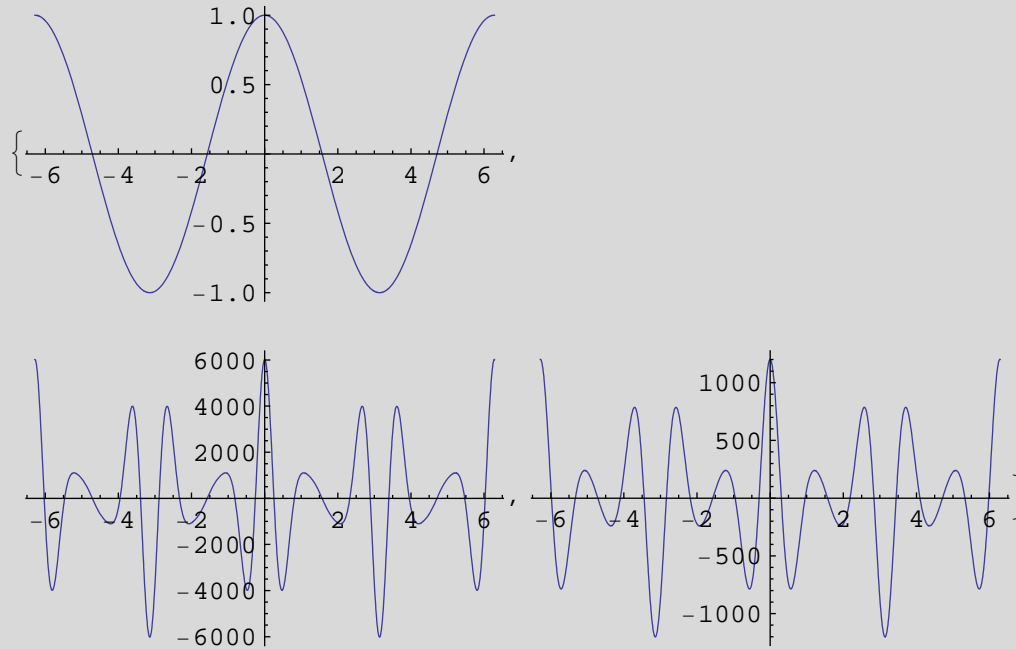

## Definition of the perturbation problem

### ■ 2D Navier-Stokes with scaling

We have taken  $u = \partial_y \psi$  and  $v = -\partial_x \psi$  (mechanical definition)

a linear friction term has been included

$$\begin{aligned} \text{NS} = & \epsilon^2 \partial_T \Delta[\psi[T, X, Y]] - \epsilon \partial_X \psi[T, X, Y] \partial_Y \Delta[\psi[T, X, Y]] + \\ & \epsilon \partial_Y \psi[T, X, Y] \partial_X \Delta[\psi[T, X, Y]] + \epsilon^2 r \Delta[\psi[T, X, Y]] - \\ & \text{DS}[\psi[T, X, Y]] + \text{DS}[\Phi[Y]] - \epsilon^2 r \Delta[\Phi[Y]]; \end{aligned}$$

### ■ Expansion

$$\begin{aligned} \psi[T_, X_, Y_] := & \Phi[Y] + \psi_0[T, X, Y] + \\ & \epsilon \psi_1[T, X, Y] + \epsilon^2 \psi_2[T, X, Y] + \epsilon^3 \psi_3[T, X, Y] + \epsilon^4 \psi_4[T, X, Y] \end{aligned}$$

```
NS2 = Collect[Normal[Series[NS, {ϵ, 0, 4}]], ϵ];
```

## Order 0

```
a0 = Simplify[Coefficient[NS2, ϵ, 0] ]
```

$$\vee \psi_0^{(0,0,8)}[T, X, Y]$$

### ■ Symbolic solution

```
Rule0 = ψ0 → (φ0[#1, #2] &);
```

### ■ Check solution

```
Simplify[a0 /. {Rule0}]
```

0

## Solvability condition

```
Solva[expr_, Rules___] :=  
  Integrate[expr /. Flatten[ {Rules}], {y, 0, 2 π}] /. g___[2 π] → g[0]
```

## Order 1

```
a1 = Simplify[Expand[Coefficient[NS2, ϵ, 1]] /. Rule0 ]
```

$$U''[Y] \varphi_0^{(0,1)}[T, X] + \vee \psi_1^{(0,0,8)}[T, X, Y]$$

### ■ Define linear operator

```
ℒ[f_] := + ∂Y,Y ( ∂Y,Y ( ∂Y,Y ( ∨ ∂Y,Y f ) ) )
```

## ■ Extraction and integration of second member

```
a1a = -Simplify[Coefficient[a1,  $\varphi_0^{(0,1)}$ [T, X]]]
-U''[Y]
```

```
a1aI2 = Integrate[Integrate[a1a, y], y]
-U[Y]
```

## ■ Reconstruction and check of the first order equation

```
a1N =  $\mathcal{L}[\psi_1[T, X, Y]] - a1a \varphi_0^{(0,1)}[T, X];$ 
Simplify[a1N - a1]
0
```

## ■ Solvability condition

The solvability condition is obviously satisfied with this second member since it has a primitive (even two primitives)

```
Solva[a1a] /. g___[2  $\pi$ ]  $\rightarrow$  g[0]
0
```

## ■ Symbolic solution

```
Rule1 =  $\psi_1 \rightarrow (f1[\#3] \varphi_0^{(0,1)}[\#1, \#2] \&);$ 
```

---

## Order 2

```
a2 = Simplify[Coefficient[NS2,  $\epsilon$ , 2] /. {Rule0, Rule1}, Trig  $\rightarrow$  True]
 $f_1^{(3)}[Y] \varphi_0^{(0,1)}[T, X]^2 - U[Y] f_1''[Y] \varphi_0^{(0,2)}[T, X] +$ 
 $f_1[Y] U''[Y] \varphi_0^{(0,2)}[T, X] + \psi_2^{(0,0,8)}[T, X, Y]$ 
```



## Extraction of second member and solvability

- term in factor of  $\varphi_0^{(0,1)}[T, X]^2$

```
a2a = -Factor[Simplify[Coefficient[a2 ,  $\varphi_0^{(0,1)}[T, X]$  , 2] ] ]
Solva[a2a]

- $f_1^{(3)}[Y]$ 
```

0

- term in factor of  $\varphi_0^{(0,2)}[T, X]$

```
a2b = -Simplify[Coefficient[a2 ,  $\varphi_0^{(0,2)}[T, X]$  , 1] ]
Integrate[a2b, y]
Solva[a2b]
```

$U[Y] f_1''[Y] - f_1[Y] U''[Y]$

$U[Y] f_1'[Y] - f_1[Y] U'[Y]$

0

- Reconstruction and check of the second order equation

```
a2N =  $\mathcal{L}[\psi_2[T, X, y]] -$ 
      a2c  $\varphi_1^{(0,1)}[T, X]$  - a2b  $\varphi_0^{(0,2)}[T, X]$  - a2a  $\varphi_0^{(0,1)}[T, X]^2$ ;
Simplify[a2N - a2]

-a2c  $\varphi_1^{(0,1)}[T, X]$ 
```

- Symbolic solution

```
Rule2 =  $\psi_2 \rightarrow \left( f_2a[\#3] \varphi_0^{(0,1)}[\#1, \#2]^2 + f_2b[\#3] \varphi_0^{(0,2)}[\#1, \#2] \ \& \right);$ 
```

## Order 3

```

a3 = FullSimplify[
  Coefficient[NS2, e, 3]  //. {Rule0, Rule1, Rule2} , Trig → True]

f2a(3)[Y] ϕ0(0,1)[T, X]3 + 2 f2a[Y] U''[Y] ϕ0(0,1)[T, X] ϕ0(0,2)[T, X] +
f1[Y] f1(3)[Y] ϕ0(0,1)[T, X] ϕ0(0,2)[T, X] +
f2b(3)[Y] ϕ0(0,1)[T, X] ϕ0(0,2)[T, X] +
f2b[Y] U''[Y] ϕ0(0,3)[T, X] + 4 √ f1(6)[Y] ϕ0(0,3)[T, X] -
U[Y] (2 f2a''[Y] ϕ0(0,1)[T, X] ϕ0(0,2)[T, X] + (1 + f2b''[Y]) ϕ0(0,3)[T, X]) -
f1''[Y] (ϕ0(0,1)[T, X] (r + f1'[Y] ϕ0(0,2)[T, X]) + ϕ0(1,1)[T, X]) +
√ ψ3(0,0,8)[T, X, Y]

```

### ■ Extraction of second member and solvability

```

a31 = Collect[Expand[a3],
  {ϕ0(1,1)[T, X], ϕ0(0,1)[T, X], ϕ0(0,2)[T, X], ϕ0(0,3)[T, X]}]

f2a(3)[Y] ϕ0(0,1)[T, X]3 +
ϕ0(0,1)[T, X] (-r f1''[Y] + (-f1'[Y] f1''[Y] - 2 U[Y] f2a''[Y] +
2 f2a[Y] U''[Y] + f1[Y] f1(3)[Y] + f2b(3)[Y]) ϕ0(0,2)[T, X]) +
(-U[Y] - U[Y] f2b''[Y] + f2b[Y] U''[Y] + 4 √ f1(6)[Y]) ϕ0(0,3)[T, X] -
f1''[Y] ϕ0(1,1)[T, X] + √ ψ3(0,0,8)[T, X, Y]

```

### ■ Term in $\phi_0^{(0,1)}[T, X]^3$ : a3a

```

a3a = -Coefficient[a31, ϕ0(0,1)[T, X]3]
Solve[a3a]

-f2a(3)[Y]

```

0

■ Term in  $\varphi_0^{(0,1)}[T, X] \varphi_0^{(0,2)}[T, X] : a3b$

```
a3b =
  -Coefficient[Coefficient[Expand[a31],  $\varphi_0^{(0,1)}[T, X], 1], \varphi_0^{(0,2)}[T, X]]
Integrate[a3b, y]
Solve[a3b]$ 
```

$$f1'[y] f1''[y] + 2 U[y] f2a''[y] - 2 f2a[y] U''[y] - f1[y] f1^{(3)}[y] - f2b^{(3)}[y]$$

$$f1'[y]^2 + 2 U[y] f2a'[y] - 2 f2a[y] U'[y] - f1[y] f1''[y] - f2b''[y]$$

0

■ Term in  $\varphi_0^{(0,3)}[T, X] : a3d$

```
a3d = -Coefficient[a31,  $\varphi_0^{(0,3)}[T, X]$ ]
Integrate[a3d - U[y], y]
Solve[a3d - U[y]]
```

$$U[y] + U[y] f2b''[y] - f2b[y] U''[y] - 4 \vee f1^{(6)}[y]$$

$$U[y] f2b'[y] - f2b[y] U'[y] - 4 \vee f1^{(5)}[y]$$

0

The solvability condition is satisfied due to the hypothesis that  $\int_0^{2\pi} U[y] dy = 0$ ,  
no other contribution

■ Term in  $\varphi^{(1,1)}[T, X] : a3g$

```
a3g = -Coefficient[a31,  $\varphi^{(1,1)}[T, X]$ ]
Solve[a3g]

f1''[y]
```

```
0
```

■ Terms due to friction

```
a3r = -Coefficient[a31,  $r \varphi^{(0,1)}[T, X]$ ]
Solve[a3r]

f1''[y]
```

```
0
```

■ Reconstruction and check of the third order equation

```
a3N =
  -a3g  $\varphi^{(1,1)}[T, X]$  - a3d  $\varphi^{(0,3)}[T, X]$  -  $\varphi^{(0,1)}[T, X]$  (a3b  $\varphi^{(0,2)}[T, X]$ ) -
  a3a  $\varphi^{(0,1)}[T, X]^3$  - r a3r  $\varphi^{(0,1)}[T, X]$  +  $\mathcal{L}[\psi_3[T, X, y]]$ ;
Simplify[a3N - a3]

0
```

■ Symbolic solution

```
Rule3 =  $\psi_3 \rightarrow$  (f3g[#3]  $\varphi^{(1,1)}[\#1, \#2]$  + f3d[#3]  $\varphi^{(0,3)}[\#1, \#2]$  +
   $\varphi^{(0,1)}[\#1, \#2]$  (f3b[#3]  $\varphi^{(0,2)}[\#1, \#2]$ ) +
  f3a[#3]  $\varphi^{(0,1)}[\#1, \#2]^3$  + r f3r[#3]  $\varphi^{(0,1)}[\#1, \#2]$  &);
```

## Order 4

```

a4 = Simplify[Coefficient[NS2, e, 4] //
  {Rule0, Rule1, Rule2, Rule3} , Trig -> True]

-r  $\varphi_0^{(0,2)}[T, X]$  -
  f1''[Y]  $\varphi_0^{(0,2)}[T, X]$   $\left( f2a'[Y] \varphi_0^{(0,1)}[T, X]^2 + f2b'[Y] \varphi_0^{(0,2)}[T, X] \right)$  -
  r  $\left( f2a''[Y] \varphi_0^{(0,1)}[T, X]^2 + f2b''[Y] \varphi_0^{(0,2)}[T, X] \right)$  +
  f1[Y]  $\varphi_0^{(0,2)}[T, X]$   $\left( f2a^{(3)}[Y] \varphi_0^{(0,1)}[T, X]^2 + f2b^{(3)}[Y] \varphi_0^{(0,2)}[T, X] \right)$  +
  f1'[Y]  $\varphi_0^{(0,1)}[T, X] \varphi_0^{(0,3)}[T, X] + f1^{(3)}[Y] \varphi_0^{(0,1)}[T, X]$ 
   $\left( 2 f2a[Y] \varphi_0^{(0,1)}[T, X] \varphi_0^{(0,2)}[T, X] + f2b[Y] \varphi_0^{(0,3)}[T, X] \right) - f1'[Y] \varphi_0^{(0,1)}[$ 
   $T, X] \left( 2 f2a''[Y] \varphi_0^{(0,1)}[T, X] \varphi_0^{(0,2)}[T, X] + (1 + f2b''[Y]) \varphi_0^{(0,3)}[T, X] \right) +$ 
   $4 \vee \left( 2 f2a^{(6)}[Y] \left( \varphi_0^{(0,2)}[T, X]^2 + \varphi_0^{(0,1)}[T, X] \varphi_0^{(0,3)}[T, X] \right) +$ 
   $f2b^{(6)}[Y] \varphi_0^{(0,4)}[T, X] \right) - 2 f2a''[Y] \varphi_0^{(0,1)}[T, X] \varphi_0^{(1,1)}[T, X] +$ 
   $\varphi_0^{(0,1)}[T, X] \left( r f3r^{(3)}[Y] \varphi_0^{(0,1)}[T, X] + f3a^{(3)}[Y] \varphi_0^{(0,1)}[T, X]^3 +$ 
   $f3b^{(3)}[Y] \varphi_0^{(0,1)}[T, X] \varphi_0^{(0,2)}[T, X] + f3d^{(3)}[Y] \varphi_0^{(0,3)}[T, X] +$ 
   $f3g^{(3)}[Y] \varphi_0^{(1,1)}[T, X] \right) - \varphi_0^{(1,2)}[T, X] - f2b''[Y] \varphi_0^{(1,2)}[T, X] +$ 
   $U''[Y] \left( r f3r[Y] \varphi_0^{(0,2)}[T, X] + 3 f3a[Y] \varphi_0^{(0,1)}[T, X]^2 \varphi_0^{(0,2)}[T, X] +$ 
   $f3b[Y] \varphi_0^{(0,2)}[T, X]^2 + f3b[Y] \varphi_0^{(0,1)}[T, X] \varphi_0^{(0,3)}[T, X] +$ 
   $f3d[Y] \varphi_0^{(0,4)}[T, X] + f3g[Y] \varphi_0^{(1,2)}[T, X] \right) -$ 
   $U[Y] \left( r f3r''[Y] \varphi_0^{(0,2)}[T, X] + 3 f3a''[Y] \varphi_0^{(0,1)}[T, X]^2 \varphi_0^{(0,2)}[T, X] + f3b''[Y]$ 
   $\varphi_0^{(0,2)}[T, X]^2 + f3b''[Y] \varphi_0^{(0,1)}[T, X] \varphi_0^{(0,3)}[T, X] + f1[Y] \varphi_0^{(0,4)}[T, X] +$ 
   $f3d''[Y] \varphi_0^{(0,4)}[T, X] + f3g''[Y] \varphi_0^{(1,2)}[T, X] \right) + \vee \psi 4^{(0,0,8)}[T, X, Y]$ 

```

■ Terms containing  $\varphi_0^{(0,1)}[T, X]$

■ Terms in  $\varphi_0^{(0,1)}[T, X]^4 : a4a$

```
a4a = -Coefficient[Expand[a4],  $\varphi_0^{(0,1)}[T, X]^4$ ]
Solve[a4a]

-f3a(3)[y]
```

0

■ Terms in  $\varphi_0^{(0,1)}[T, X]^3$

```
Coefficient[Expand[a4],  $\varphi_0^{(0,1)}[T, X]^3$ ]

0
```

■ Terms in  $\varphi_0^{(0,1)}[T, X]^2$

```
a42 = Coefficient[Expand[a4],  $\varphi_0^{(0,1)}[T, X]^2$ ]

-r f2a''[y] + r f3r(3)[y] - f2a'[y] f1''[y]  $\varphi_0^{(0,2)}[T, X]$  -
2 f1'[y] f2a''[y]  $\varphi_0^{(0,2)}[T, X]$  - 3 U[y] f3a''[y]  $\varphi_0^{(0,2)}[T, X]$  +
3 f3a[y] U''[y]  $\varphi_0^{(0,2)}[T, X]$  + 2 f2a[y] f1(3)[y]  $\varphi_0^{(0,2)}[T, X]$  +
f1[y] f2a(3)[y]  $\varphi_0^{(0,2)}[T, X]$  + f3b(3)[y]  $\varphi_0^{(0,2)}[T, X]$ 
```

■ Terms in  $r \varphi_0^{(0,1)}[T, X]^2 : a4u$

```
a4u = -Coefficient[Expand[a42], r]
Solve[a4u]

f2a''[y] - f3r(3)[y]
```

0

■ Terms in  $\varphi_0^{(0,1)}[T, X]^2 \varphi_0^{(0,2)}[T, X] : a4c$

```
a4c = -Coefficient[Expand[a42],  $\varphi_0^{(0,2)}[T, X]$ ]
Integrate[a4c, y]
Solva[a4c]
```

$$f2a'[y] f1''[y] + 2 f1'[y] f2a''[y] + 3 U[y] f3a''[y] - \\ 3 f3a[y] U''[y] - 2 f2a[y] f1^{(3)}[y] - f1[y] f2a^{(3)}[y] - f3b^{(3)}[y]$$

$$3 f1'[y] f2a'[y] + 3 U[y] f3a'[y] - \\ 3 f3a[y] U'[y] - 2 f2a[y] f1''[y] - f1[y] f2a''[y] - f3b''[y]$$

$$0$$

■ Terms in  $\varphi_0^{(0,1)}[T, X]$

```
a43 = Coefficient[Expand[a4],  $\varphi_0^{(0,1)}[T, X]$ ]
```

$$-f1'[y] f2b''[y] \varphi_0^{(0,3)}[T, X] - U[y] f3b''[y] \varphi_0^{(0,3)}[T, X] + \\ f3b[y] U''[y] \varphi_0^{(0,3)}[T, X] + f2b[y] f1^{(3)}[y] \varphi_0^{(0,3)}[T, X] + \\ f3d^{(3)}[y] \varphi_0^{(0,3)}[T, X] + 8 \vee f2a^{(6)}[y] \varphi_0^{(0,3)}[T, X] - \\ 2 f2a''[y] \varphi_0^{(1,1)}[T, X] + f3g^{(3)}[y] \varphi_0^{(1,1)}[T, X]$$

■ Term in  $\varphi_0^{(0,1)}[T, X] \varphi_0^{(0,3)}[T, X] : a4g$

```
a4g = -Coefficient[Expand[a43],  $\varphi_0^{(0,3)}[T, X]$ ]
Integrate[a4g, y]
Solva[a4g]
```

$$f1'[y] f2b''[y] + U[y] f3b''[y] - f3b[y] U''[y] - \\ f2b[y] f1^{(3)}[y] - f3d^{(3)}[y] - 8 \vee f2a^{(6)}[y]$$

$$f1'[y] f2b'[y] + U[y] f3b'[y] - \\ f3b[y] U'[y] - f2b[y] f1''[y] - f3d''[y] - 8 \vee f2a^{(5)}[y]$$

$$0$$

- Term in  $\varphi_0^{(0,1)}[T, X] \varphi_0^{(1,1)}[T, X]$  : a4h

```
a4h = -Coefficient[ Expand[a43],  $\varphi_0^{(1,1)}[T, X]$  ]
Solve[a4h]
```

```
2 f2a''[Y] - f3g(3)[Y]
```

```
0
```

- Select terms that do not contain  $\varphi_0^{(0,1)}[T, X]$

```
a45 = a4 /.  $\varphi_0^{(0,1)}[T, X] \rightarrow 0$ 
```

```
-r  $\varphi_0^{(0,2)}[T, X]$  - r f2b''[Y]  $\varphi_0^{(0,2)}[T, X]$  -
f2b'[Y] f1''[Y]  $\varphi_0^{(0,2)}[T, X]^2$  + f1[Y] f2b(3)[Y]  $\varphi_0^{(0,2)}[T, X]^2$  +
4  $\vee$   $\left( 2 f2a^{(6)}[Y] \varphi_0^{(0,2)}[T, X]^2 + f2b^{(6)}[Y] \varphi_0^{(0,4)}[T, X] \right)$  -
 $\varphi_0^{(1,2)}[T, X] - f2b''[Y] \varphi_0^{(1,2)}[T, X] + U''[Y] \left( r f3r[Y] \varphi_0^{(0,2)}[T, X] + \right.$ 
 $\left. f3b[Y] \varphi_0^{(0,2)}[T, X]^2 + f3d[Y] \varphi_0^{(0,4)}[T, X] + f3g[Y] \varphi_0^{(1,2)}[T, X] \right) -$ 
 $U[Y] \left( r f3r''[Y] \varphi_0^{(0,2)}[T, X] + f3b''[Y] \varphi_0^{(0,2)}[T, X]^2 + f1[Y] \varphi_0^{(0,4)}[T, X] + \right.$ 
 $\left. f3d''[Y] \varphi_0^{(0,4)}[T, X] + f3g''[Y] \varphi_0^{(1,2)}[T, X] \right) + \vee \psi 4^{(0,0,8)}[T, X, Y]$ 
```



- Term in  $\varphi_0^{(0,4)}[T, X]$  : a4l : contribution to the amplitude equation

```
a4l = -Coefficient[a45,  $\varphi_0^{(0,4)}[T, X]$ ]
```

```
Integrate[a4l - f1[y] U[y], y]
```

```
Solva[a4l - f1[y] U[y]]
```

```
Integrate[f1[y] U[y], {y, 0, 2  $\pi$ }]
```

$$f1[y] U[y] + U[y] f3d''[y] - f3d[y] U''[y] - 4 \sqrt{f2b^{(6)}[y]}$$

$$U[y] f3d'[y] - f3d[y] U'[y] - 4 \sqrt{f2b^{(5)}[y]}$$

$$0$$

$$\int_0^{2\pi} f1[y] U[y] dy$$

The last line is the contribution to the amplitude equation

- Term in  $\varphi_0^{(1,2)}[T, X]$  : a4n : Contributes to the amplitude equation

```
a4n = -Coefficient[Expand[a45],  $\varphi_0^{(1,2)}[T, X]$ ]
```

```
Integrate[a4n, y]
```

```
Solva[a4n]
```

$$1 + f2b''[y] + U[y] f3g''[y] - f3g[y] U''[y]$$

$$y + f2b'[y] + U[y] f3g'[y] - f3g[y] U'[y]$$

$$2\pi$$

■ Term in  $\varphi_0^{(0,2)}[T, X]^2$  : a4o

```
a4o = -Coefficient[Expand[a45],  $\varphi_0^{(0,2)}[T, X]^2$ ]
Integrate[a4o, y]
Solva[a4o]
```

$$f2b'[y] f1''[y] + U[y] f3b''[y] - f3b[y] U''[y] - f1[y] f2b^{(3)}[y] - 8 \vee f2a^{(6)}[y]$$

```
f1'[y] f2b'[y] + U[y] f3b'[y] - f3b[y] U'[y] - f1[y] f2b''[y] - 8 \vee f2a^{(5)}[y]
```

```
0
```

■ Term in  $\varphi_0^{(0,2)}[T, X]$  : a4p : Contributes to the amplitude equation (if r ≠ 0)

```
a4p = -Coefficient[Expand[a45] /.  $\varphi_1^{(0,1)}[T, X] \rightarrow 0$ ,  $\varphi_0^{(0,2)}[T, X]$ ]
Integrate[a4p, y]
Solva[a4p]
```

$$r + r f2b''[y] + r U[y] f3r''[y] - r f3r[y] U''[y]$$

```
r y + r f2b'[y] + r U[y] f3r'[y] - r f3r[y] U'[y]
```

```
2  $\pi$  r
```

■ Verification

```
a4NN = -a4o  $\varphi_0^{(0,2)}[T, X]^2$  - a4n  $\varphi_0^{(1,2)}[T, X]$  - a4l  $\varphi_0^{(0,4)}[T, X]$  -
 $\varphi_0^{(0,1)}[T, X] (a4g \varphi_0^{(0,3)}[T, X] + a4h \varphi_0^{(1,1)}[T, X])$  -
 $\varphi_0^{(0,1)}[T, X]^2 (a4c \varphi_0^{(0,2)}[T, X])$  - a4a  $\varphi_0^{(0,1)}[T, X]^4$  -
a4u r  $\varphi_0^{(0,1)}[T, X]^2$  - a4p  $\varphi_0^{(0,2)}[T, X]$  +  $\mathcal{L}[\psi_4[T, X, y]]$ ;
Simplify[a4 - a4NN]
```

```
0
```

## Discussion

The amplitude equation is

$$\varphi_0^{(1,2)}[T, X] + r \varphi_0^{(0,2)}[T, X] + \left( \frac{1}{2\pi} \int_0^{2\pi} f_1[Y] U[Y] dY \right) \varphi_0^{(0,4)}[T, X] = 0$$

After integration by part, using the fact that  $v f_1^{(6)} = -U$ , the integral is  $\frac{1}{2\pi v} \int_0^{2\pi} \Psi^2 dy$

Hence we have again a negative viscosity effect with a threshold which requires to calculate  $f_1[y]$ .

Friction appears in this equation because it has been assumed of order  $\epsilon^2$ .

The amplitude equation has been obtained independently of any symmetry hypothesis

The only hypothesis is that  $\int_0^{2\pi} U[Y] dY = 0$ .

### ■ Instability coefficient (with no friction)

```
{NIntegrate[ $\frac{1}{2\pi} \xi_1[s]^2 /. \xi_1sol$ , {s, 0, 2\pi}],  
  
NIntegrate[ $\frac{1}{2\pi} \xi_2[s]^2 /. \xi_2sol$ , {s, 0, 2\pi}],  
  
NIntegrate[ $\frac{1}{2\pi} \xi_3[s]^2 /. \xi_3sol$ , {s, 0, 2\pi}]}  
  
{0.5}, {0.697102}, {0.614353}}
```

We recover values which are close to the instability criterion in the viscous case. Not surprising since the streamfunction is in all cases dominated by the leading mode and that higher modes are further damped when  $\xi$  is calculated.

Dump the current state of this workspace and reload it

```
DumpSave["CH-lin2-nu-12.m6.mx", "Global`"]  
  
{Global`}
```

```
<< CH-lin2-nu-12.m6.mx
```
