# Supplementary material for: Large-scale instability of a generalized turbulent Kolmogorov flow
Source: Copernicus journal article supplement (doi:10.5194/npg-16-569-2009), 2009-08-31
Supplement: Supplementary file 2 [file npg-16-569-2009-supplement.zip]

# Large-scale linear instability of the generalized Kolmogorov flow with modified viscosity

Bernard Legras  
 Laboratoire de Meteorologie Dynamique  
 Ecole Normale Supérieure  
 24 rue Lhomond  
 F-75231 PARIS Cedex 05  
 E-mail: legras@lmd.ens.fr  
 Barbara Villone  
 Istituto di Fisica dello Spazio Interplanetario  
 Corso Fiume, 4  
 I-10137 TORINO  
 E-mail: villone@to.infn.it

Smagorinsky-Clark mixed model + friction

$U = A \sin[\theta(y)]$  where  $\theta(y) = \sum \hat{\theta}_p \sin[2 p y]$

Streamfunction defined as  $u = \partial_y \psi$ ,  $v = -\partial_x \psi$

Calculations are done in terms of  $U$ , not expanding in  $\theta(y)$

Settings

## Last use

In[13]:= `DateList[]`

Out[13]:= `{2009, 1, 14, 16, 32, 21.058743}`

## General

In[2]:= `Off[General::spell1]`

## Laplacian

In[3]:=  $\Delta = - \left( \epsilon^2 \partial_{x,x}^{**} + \partial_{y,y}^{**} \right) \&$

Out[3]:=  $- \left( \epsilon^2 \partial_{x,x}^{**1} + \partial_{y,y}^{**1} \right) \&$

## Definition of the turbulent viscosity, Smagorinsky-Clark mixed model

Standard version with a heuristic component accounting for the vertical shear

$$\text{In}[4]:= \bar{S} = \sqrt{4 \left( \epsilon \partial_{x,y} \# \right)^2 + \left( \epsilon^2 \partial_{x,x} \# - \partial_{y,y} \# \right)^2 + \mu \left( \epsilon \partial_x \# \right)^2 + \mu \left( \partial_y \# \right)^2} \&$$

$$\text{Out}[4]= \sqrt{4 \left( \epsilon \partial_{x,y} \#1 \right)^2 + \left( \epsilon^2 \partial_{x,x} \#1 - \partial_{y,y} \#1 \right)^2 + \mu \left( \epsilon \partial_x \#1 \right)^2 + \mu \left( \partial_y \#1 \right)^2} \&$$

Dissipation: C in front of the Smagorinsky component, D in front of the Clark component

In standard notations  $D=\Gamma^2/12$  and  $C = C_s \Gamma^2$

Note that  $K=-DS$  in the paper

$$\text{In}[5]:= DS = C \left( \partial_{y,y} \left( \bar{S}[\#] \left( -\partial_{y,y} \# + \epsilon^2 \partial_{x,x} \# \right) \right) - \epsilon^2 \partial_{x,x} \left( \bar{S}[\#] \left( -\partial_{y,y} \# + \epsilon^2 \partial_{x,x} \# \right) \right) - 4 \epsilon^2 \partial_{x,y} \left( \bar{S}[\#] \partial_{x,y} \# \right) \right) + D \left( \epsilon \partial_{x,y} \# \left( \epsilon^4 \partial_{x,x,x,x} \# - \partial_{y,y,y,y} \# \right) + \left( \epsilon \partial_{x,y,y,y} \# + \epsilon^3 \partial_{x,x,x,y} \# \right) \left( \partial_{y,y} \# - \epsilon^2 \partial_{x,x} \# \right) \right) \&$$

$$\text{Out}[5]= C \left( \partial_{y,y} \left( \bar{S}[\#1] \left( -\partial_{y,y} \#1 + \epsilon^2 \partial_{x,x} \#1 \right) \right) - \epsilon^2 \partial_{x,x} \left( \bar{S}[\#1] \left( -\partial_{y,y} \#1 + \epsilon^2 \partial_{x,x} \#1 \right) \right) - 4 \epsilon^2 \partial_{x,y} \left( \bar{S}[\#1] \partial_{x,y} \#1 \right) \right) + D \left( \epsilon \partial_{x,y} \#1 \left( \epsilon^4 \partial_{x,x,x,x} \#1 - \partial_{y,y,y,y} \#1 \right) + \left( \epsilon \partial_{x,y,y,y} \#1 + \epsilon^3 \partial_{x,x,x,y} \#1 \right) \left( \partial_{y,y} \#1 - \epsilon^2 \partial_{x,x} \#1 \right) \right) \&$$

Reference

Pope, S.B. Turbulent flows, C.U.P., 2000

## Definition of the generalized Kolmogorov Flow

### Velocity and streamfunction

$$U[y_] := A \sin[\theta[y]]$$

$$\text{In}[6]:= \Phi[y_] := \text{Integrate}[U[s], \{s, 0., y\}]$$

### Exemples of flows

Standard Kolmogorov flow in Flow1, "flat" flow in Flow2, intermediate case in Flow3

$$\text{In}[140]:= \begin{aligned} \text{Flow2} &= U \rightarrow \text{Evaluate}\left[\sin\left[\# + \frac{1}{2} \sin[2\#]\right] \&\right]; \\ \text{Flow1} &= U \rightarrow \text{Evaluate}[\sin[\#] \&]; \\ \text{Flow3} &= U \rightarrow \text{Evaluate}\left[\sin\left[\# + \frac{1}{4} \sin[2\#]\right] \&\right]; \end{aligned}$$

## Plots of the flow

```
p1 = Plot[U[y] /. {Flow1, A → 1}, {y, -2 π, 2 π}, DisplayFunction → Identity];
p2 = Plot[U[y] /. {Flow2, A → 1}, {y, -2 π, 2 π}, DisplayFunction → Identity];
p3 = Plot[U[y] /. {Flow3, A → 1}, {y, -2 π, 2 π}, DisplayFunction → Identity];
Show[GraphicsRow[{p1, p2, p3}]]
```

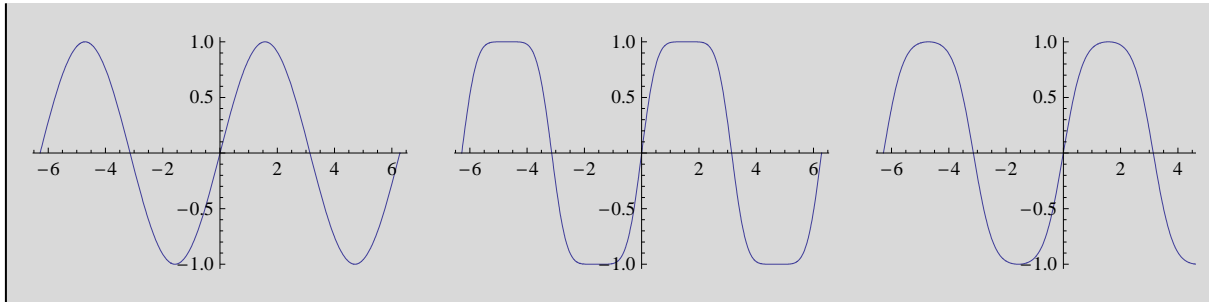

## Plots of the streamfunction

### Plots of the forcing (or dissipation)

Forcing is calculated to equilibrate the dissipation since there is no advection for a flow that depends only on  $y$ . Some arbitrary values are assumed for the parameters

```
Forcing = Assuming[A > 0 && θ'[y] > 0, Simplify[DS[ϕ[y]]]]
```

$$-\frac{1}{(\mu U[y]^2 + U'[y]^2)^{3/2}} \\ C (\mu U'[y]^5 + 3\mu U[y]^2 U'[y] U''[y] (\mu U[y] + U''[y]) + U'[y]^3 U''[y] (\mu U[y] + 2 U''[y]) + \\ \mu^2 U[y]^4 U^{(3)}[y] + 3\mu U[y]^2 U'[y]^2 U^{(3)}[y] + 2 U'[y]^4 U^{(3)}[y])$$

Setting  $\mu \rightarrow 0$ , shows that Flow1 requires a forcing with discontinuities that disappear in Flow2 and Flow3.

```
p1 = Plot[Forcing /. {Flow1, A → 1, C → 1, μ → 0.}, {y, -2 π, 2 π}, PlotRange → All, DisplayFunction → Identity];
p2 = Plot[Forcing /. {Flow2, A → 1, C → 1, μ → 0.}, {y, -2 π, 2 π}, PlotRange → All, DisplayFunction → Identity];
p3 = Plot[Forcing /. {Flow3, A → 1, C → 1, μ → 0.}, {y, -2 π, 2 π}, PlotRange → All, DisplayFunction → Identity];
Show[GraphicsRow[{p1, p2, p3}]]
```

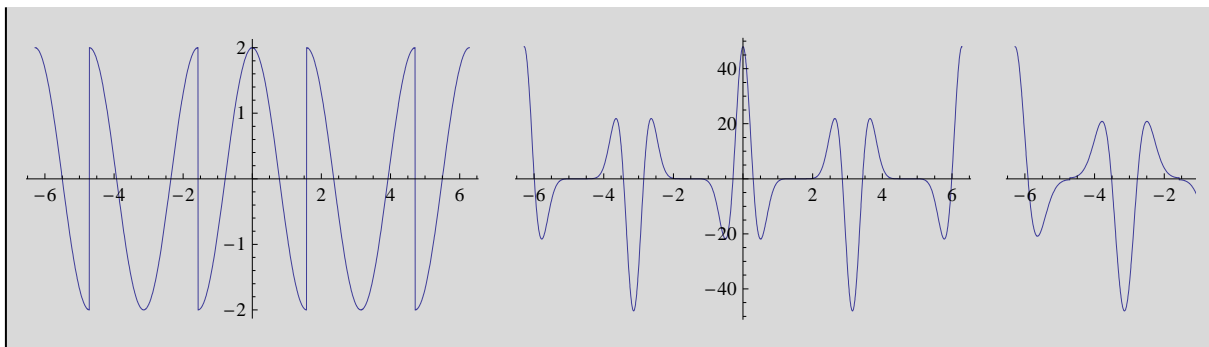

Setting  $\mu \rightarrow 0.5$  shows that the discontinuities disappear in Flow1, while the forcings in Flow2 and Flow3 are hardly modified

```

p1 = Plot[ Forcing /. {Flow1, A → 1, C → 1, μ → 0.5},
  {y, -2 π, 2 π}, PlotRange → All, DisplayFunction → Identity];
p2 = Plot[ Forcing /. {Flow2, A → 1, C → 1, μ → 0.5}, {y, -2 π, 2 π},
  PlotRange → All, DisplayFunction → Identity];
p3 = Plot[ Forcing /. {Flow3, A → 1, C → 1, μ → 0.5}, {y, -2 π, 2 π},
  PlotRange → All, DisplayFunction → Identity];
Show[GraphicsRow[{p1, p2, p3}]]

```

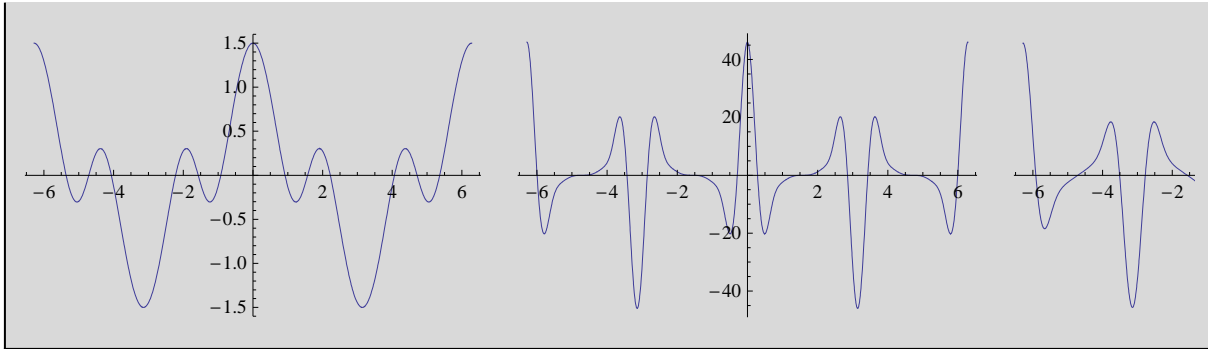

## Definition of the perturbation problem

### 2D Navier-Stokes with scaling

We have taken  $u = \partial_y \psi$  and  $v = -\partial_x \psi$  (definition used in fluid mechanics, opposite to the convention in GFD)

```

In[7]:= NS = ε² ∂ₜ Δ[ψ[T, X, Y]] - ε ∂ₓ ψ[T, X, Y] ∂ₓ Δ[ψ[T, X, Y]] +
  ε ∂ᵧ ψ[T, X, Y] ∂ᵧ Δ[ψ[T, X, Y]] - DS[ψ[T, X, Y]] + DS[ϕ[Y]];

```

### Expansion

The streamfunction is expanded up to the fourth order in  $\epsilon$

```

In[8]:= ψ[T_, X_, Y_] :=
  ϕ[Y] + ψ₀[T, X, Y] + ε ψ₁[T, X, Y] + ε² ψ₂[T, X, Y] + ε³ ψ₃[T, X, Y] + ε⁴ ψ₄[T, X, Y]

```

```

In[9]:= NS2 = Collect[Normal[Series[NS, {ε, 0, 4}]], ε];

```

## Order 0

Extract order 0 terms from the general expansion and perform algebraic simplification.  
Fairly lengthy expression anyway.

```

In[14]:= a0 = Simplify[Coefficient[NS2, ε, 0]]

```

### Symbolic solution

The 0 th order solution satisfies  $a_0 = 0$  as soon as it does not depend on the fast variable  $y$

```
In[16]:= Rule0 =  $\psi_0 \rightarrow (\varphi_0[\#1, \#2] \&)$ 
```

```
Out[16]:=  $\psi_0 \rightarrow (\varphi_0[\#1, \#2] \&)$ 
```

## Verification

Check that  $\varphi_0[X,T]$  satisfies the 0 th order solution

```
In[17]:= FullSimplify[a0 /. {Rule0}]
```

```
Out[17]:= 0
```

## Useful rules for simplifications

```
In[10]:= Rulea =  $\left( A^2 \mu \sin[\theta[Y]]^2 + A^2 \cos[\theta[Y]]^2 \theta'[Y]^2 \right)^{n-} \rightarrow A^{2n} \left( \mu \sin[\theta[Y]]^2 + \cos[\theta[Y]]^2 \theta'[Y]^2 \right)^n$ 
```

```
Out[10]:=  $\left( A^2 \mu \sin[\theta[Y]]^2 + A^2 \cos[\theta[Y]]^2 \theta'[Y]^2 \right)^{n-} \rightarrow A^{2n} \left( \mu \sin[\theta[Y]]^2 + \cos[\theta[Y]]^2 \theta'[Y]^2 \right)^n$ 
```

```
In[11]:= Improve = Simplify[Together[#1]] &
```

```
Out[11]:= Simplify[Together[#1]] &
```

Periodicity in space

```
In[12]:= Solva[expr_] := ((expr /. y -> 2  $\pi$ ) - (expr /. y -> 0)) /. g___[2  $\pi$ ] -> g[0]
```

## Order 1

Extract order 1 terms from the general expansion, use formal solution to order 0 equation and perform algebraic simplification.  
Need to be put under the form  $\mathcal{L} \psi_1[T, X, Y] = \text{second member}$

```
In[18]:= a1 = Simplify[Expand[Coefficient[NS2,  $\epsilon$ , 1]] /. Rule0]
```

### Extraction of the linear operator and verification

First derivative of  $\psi$  lin y

In[19]:= **a1F1 = FullSimplify[Coefficient[a1,  $\psi_1^{(0,0,1)}$ [T, X, Y]], Trig → True]**

Out[19]= 
$$\frac{1}{(\mu U[Y]^2 + U'[Y]^2)^{5/2}}$$

$$C \mu (-3 \mu U[Y] U'[Y]^5 + 7 \mu U[Y]^2 U'[Y]^3 U''[Y] + U'[Y]^5 U''[Y] + \mu^2 U[Y]^5 U^{(3)}[Y] + \mu U[Y]^3 U'[Y] (-3 U''[Y]^2 + U'[Y] U^{(3)}[Y]))$$

Second derivative of  $\psi$  lin y

In[20]:= **a1F2 = FullSimplify[Coefficient[a1,  $\psi_1^{(0,0,2)}$ [T, X, Y]], Trig → True]**

Out[20]= 
$$\frac{1}{(\mu U[Y]^2 + U'[Y]^2)^{5/2}}$$

$$C (3 \mu^3 U[Y]^5 U''[Y] - 3 \mu^2 U[Y]^3 U'[Y]^2 U''[Y] + 5 \mu U[Y]^2 U'[Y]^3 (\mu U'[Y] + U^{(3)}[Y]) + 2 U'[Y]^5 (\mu U'[Y] + U^{(3)}[Y]) + 3 \mu^2 U[Y]^4 (U''[Y]^2 + U'[Y] U^{(3)}[Y]))$$

Third derivative of  $\psi$  lin y

In[21]:= **a1F3 = Factor[Simplify[Coefficient[a1,  $\psi_1^{(0,0,3)}$ [T, X, Y]]]]**

Out[21]= 
$$\frac{C U'[Y] (3 \mu^2 U[Y]^3 + \mu U[Y] U'[Y]^2 + 6 \mu U[Y]^2 U''[Y] + 4 U'[Y]^2 U''[Y])}{(\mu U[Y]^2 + U'[Y]^2)^{3/2}}$$

Fourth derivative of  $\psi$  lin y

In[22]:= **a1F4 = Factor[Simplify[Coefficient[a1,  $\psi_1^{(0,0,4)}$ [T, X, Y]]]]**

Out[22]= 
$$\frac{C (\mu U[Y]^2 + 2 U'[Y]^2)}{\sqrt{\mu U[Y]^2 + U'[Y]^2}}$$

Complete form of  $\mathcal{L}$  and verification against the terms extracted from a1

In[23]:= 
$$\mathcal{L}[f_] := C \partial_{y,y} \left( \frac{(\mu U[Y]^2 + 2 U'[Y]^2)}{\sqrt{\mu U[Y]^2 + U'[Y]^2}} \partial_{y,y} f \right) + C \mu \partial_{y,y} \left( \frac{U[Y] U'[Y]}{\sqrt{\mu U[Y]^2 + U'[Y]^2}} \partial_y f \right)$$

In[24]:= **Simplify[ $\mathcal{L}[f[Y]] - a1F1 f^{(1)}[Y] - a1F2 f^{(2)}[Y] - a1F3 f^{(3)}[Y] - a1F4 f^{(4)}[Y]$ , Trig → True]**

Out[24]= 0

### Extraction of second member: a1a

The second member contains only the first derivative in X of the 0th order solution

```
In[25]:= a1a = -Simplify[Coefficient[a1,  $\varphi_0^{(0,1)}$ [T, X]]]
```

```
Out[25]= -U''[Y]
```

### Reconstruction of the first order equation

We check here that the first order equation is  $\mathcal{L}[\psi_1[T, X, Y]] = -U''[Y] \varphi_0^{(0,1)}[T, X]$

```
In[26]:= a1N =  $\mathcal{L}[\psi_1[T, X, Y]] - a1a \varphi_0^{(0,1)}[T, X];$ 
```

```
In[27]:= Simplify[a1N - a1]
```

```
Out[27]= 0
```

### Solvability condition

The solvability condition is that the integral in  $y$  from 0 to  $2\pi$  of the second member vanishes. It is obviously satisfied with the second member of the first order equation which is proportional to the second derivative of  $\sin[\theta[y]]$  as checked here

```
In[28]:= Simplify[a1a + AD[Sin[ $\theta[Y]$ ], {Y, 2}]]
```

```
Out[28]= -A Sin[ $\theta[Y]$ ]  $\theta'[Y]^2 - U''[Y] + A \cos[\theta[Y]] \theta''[Y]$ 
```

### Symbolic solution

This solution is meant to replace  $\psi$  in further formal steps of the perturbative expansion

```
In[29]:= Rule1 =  $\psi_1 \rightarrow (f1[\#3] \varphi_0^{(0,1)}[\#1, \#2] \&)$ 
```

```
Out[29]=  $\psi_1 \rightarrow (f1[\#3] \varphi_0^{(0,1)}[\#1, \#2] \&)$ 
```

Notice that f1 has SinI symmetry

## Order 2

Extract order 2 terms from the general expansion, use formal solution to order 0 and 1 equations and perform algebraic simplification.

Need to be put under the form  $\mathcal{L}[\psi_2[T, X, Y]] = \text{second member}$

```
In[30]:= a2 = Simplify[Coefficient[NS2,  $\epsilon$ , 2] /. {Rule0, Rule1}];
```

### Extraction of second member and solvability

Here we extract the terms of the second member, factor per factor, and we test the solvability condition

**term in factor of  $\varphi 0^{(0,1)}[T, X]^2$  : a2a**

```
In[31]:= a2a = Collect[-Simplify[Coefficient[a2,  $\varphi 0^{(0,1)}[T, X], 2]$ ], {A, D, C}];
```

Check that this simplification can be somewhat improved for the term which is not in factor of C

```
In[32]:= Simplify[a2a /. C → 0]
```

```
Out[32]:= -f1(3)[Y]
```

This term integrates twice in y and satisfies the solvability condition

```
In[33]:= a2a1 = Coefficient[a2a, C];
```

```
a2a1I = Integrate[a2a1, y];
```

```
a2a1I2 = Integrate[a2a1I, y]
```

```
In[34]:= a2a1I2 = -1/2 ( (2  $\mu^2$  U[Y]3 f1'[Y] f1''[Y] + U'[Y]3 ( $\mu$  +  $\mu$  f1'[Y]2 + 2 f1''[Y]2) +  

 $\mu$  U[Y]2 U'[Y] ( $\mu$  + 3 f1''[Y]2) ) / (  $\mu$  U[Y]2 + U'[Y]2 )3/2 );  

Simplify[D[a2a1I2, {y, 2}] - a2a1]
```

```
Out[35]:= 0
```

**term in factor of  $\varphi 0^{(0,2)}[T, X]$  : a2b**

```
In[38]:= a2b = -Collect[Simplify[Coefficient[a2,  $\varphi 0^{(0,2)}[T, X], 1]$ ], {A, D, C}];
```

Split it in several part for integration. First isolate the part that does not depend on C and D and integrate it once.

```
In[39]:= a2b0 = a2b /. {D → 0, C → 0};  
a2b1I = Integrate[a2b0, y]
```

```
Out[40]:= U[Y] f1'[Y] - f1[Y] U'[Y]
```

Then isolate the factor of C and checks it integrates twice

```
In[41]:= a2b1 = Coefficient[a2b, C];
```

```
a2b2I2 = Integrate[Integrate[a2b1, y], y]
```

```
In[42]:= a2b2I2 =  $\frac{\mu U[Y]^2 + 2 U'[Y]^2}{\sqrt{\mu U[Y]^2 + U'[Y]^2}};$   

Simplify[D[a2b2I2, {y, 2}] - a2b1]
```

```
Out[43]:= 0
```



Isolate the factor of D and integrate it once

```
In[44]:= a2b2 = Coefficient[a2b, D];
a2b0I = Integrate[a2b2, y]
```

```
Out[45]= U'[y] f1''[y] - f1'[y] U''[y]
```

Complete the solvability proof for a2b by check that nothing has been forgotten in a2b

```
In[46]:= Simplify[a2b - a2b0 - C a2b1 - D a2b2]
```

```
Out[46]= 0
```

## Reconstruction and verification of the second order equation

Check that nothing has been forgotten in the extraction of the components of a2

```
In[47]:= a2N = L[ψ2[T, X, y]] - a2b φ0^(0,2)[T, X] - a2a φ0^(0,1)[T, X]^2;
Simplify[a2N - a2]
```

```
Out[48]= 0
```

## Symbolic solution

```
In[49]:= Rule2 = ψ2 → (f2a[#3] φ0^(0,1)[#1, #2]^2 + f2b[#3] φ0^(0,2)[#1, #2] &)
```

```
Out[49]= ψ2 → (f2a[#3] φ0^(0,1)[#1, #2]^2 + f2b[#3] φ0^(0,2)[#1, #2] &)
```

f2a has CosI symmetry

f2b has CosP symmetry

---

## Order 3

Extract order 3 terms from the general expansion, use formal solution to order 0, 1 and 2 equations and perform algebraic simplification.

Need to be put under the form  $\mathcal{L} \psi_3[T, X, y] = \text{second member}$

No attempts to simplify here

NOTICE THAT, FOR HISTORICAL REASONS, THE  $a_{xx}$  TERMS AT THIS ORDER AND THE NEXT ONE IN THIS NOTEBOOK ARE DEFINED AS THE NEGATIVE OF THOSE USED IN THE PAPER AND OTHER NOTEBOOK (SEE THE VERIFICATION STEP)

The terms marked as [S] require the symmetry assumption to satisfy the solvability condition. Only term 3d is involved at this order.

Pre-defined integrals at this order and the next one in this notebook have been derived from the calculation of primitives obtained with *Mathematica* with  $U = \sin[\theta[y]]$ . For some unknown reasons, *Mathematica* is more able to find the primitive under this form than using  $U$  alone.

```
In[50]:= a3 = Coefficient[NS2, ε, 3] /. {Rule0, Rule1, Rule2};
```

## Extraction of second member and solvability

First reorganize a3 in order to make further extraction easier

```
In[51]:= a31 = Collect[Expand[a3], {ϕ0(1,1)[T, X], ϕ0(0,1)[T, X], ϕ0(0,2)[T, X], ϕ0(0,3)[T, X]}];
```

**Term in  $\varphi_0^{(0,1)}[T, X]^3$  : a3a**

```
In[52]:= a3a = Collect[Coefficient[a31 /. Rulea, ϕ0(0,1)[T, X]3], C];
```

Term excluding factor C, which can be integrated in y

```
In[54]:= a3a /. C → 0.;
```

Get term in factor of C and check that the combination, adding previous contribution, reconstructs a3a

```
In[55]:= a3a1 = Coefficient[a3a, C];
a3a - C a3a1 - (a3a /. C → 0)
```

```
Out[56]= 0
```

```
a3a1I = Integrate[a3a1, y];
a3a1I2 = Integrate[a3a1I, y];
```

```
In[57]:= a3a1I2 = (μ2 U[y] (-f1'[y] U'[y] + U[y] f1''[y])
  ((1 + f1'[y]2) U'[y]2 - 2 U[y] f1'[y] U'[y] f1''[y] + U[y]2 (μ + f1''[y]2))) /
  (2 (μ U[y]2 + U'[y]2)5/2) + (μ f1'[y] (f2a'[y] U'[y]3 + μ U[y]3 f2a''[y]) +
  f1''[y] (μ2 U[y]3 f2a'[y] + U'[y] (3 μ U[y]2 + 2 U'[y]2) f2a''[y])) / (μ U[y]2 + U'[y]2)3/2;
Simplify[D[a3a1I2, {y, 2}] - a3a1]
```

```
Out[58]= 0
```

Solvability is satisfied since all components of a3a integrate twice in y. Notice that it would be sufficient to check that the solvability condition is satisfied on the first integral but more compact expressions are obtained when a second primitive can be obtained.

**Terms in factor of  $\varphi_0^{(0,1)}[T, X]$**

Group of all terms containing  $\varphi_0^{(0,1)}[T, X]$  in factor

```
In[59]:= a33 = Coefficient[Expand[a31], ϕ0(0,1)[T, X]];
```

**Term in  $\varphi_0^{(0,1)}[T, X] \varphi_0^{(0,2)}[T, X]$  : a3b**

```
In[60]:= a3b = Collect[Coefficient[a33 /. Rulea, ϕ0(0,2)[T, X]], {D, C}];
```

Term not in factor of C within a3b

In[61]:= **a3b0 = a3b /. C → 0**

Out[61]= 
$$-f1'[Y] f1''[Y] - 2 U[Y] f2a''[Y] + 2 f2a[Y] U''[Y] + f1[Y] f1^{(3)}[Y] + f2b^{(3)}[Y] +$$
  

$$D(-f1''[Y] f1^{(3)}[Y] - 2 U'[Y] f2a^{(3)}[Y] + 2 f2a'[Y] U^{(3)}[Y] + f1'[Y] f1^{(4)}[Y])$$

In[62]:= **a3b0I = Integrate[a3b0, y]**

Out[62]= 
$$-f1'[Y]^2 - 2 U[Y] f2a'[Y] + f1[Y] f1''[Y] - D f1''[Y]^2 +$$
  

$$2 U'[Y] (f2a[Y] - D f2a''[Y]) + f2b''[Y] + 2 D f2a'[Y] U''[Y] + D f1'[Y] f1^{(3)}[Y]$$

Term in factor of C within a3b, checking that it combines with a3b0 to reconstruct a3b

In[63]:= **a3b2 = Coefficient[a3b, C];**  
**a3b - C a3b2 - a3b0**

Out[64]= 0

Integrate twice a3b2, completing the proof of solvability for a3b

a3b2I = Integrate[a3b2, y]  
a3b2I2 = Integrate[a3b2I, y]

In[65]:= **a3b2I2 =**  

$$(\mu f1[Y] U'[Y] (\mu U[Y]^2 + U'[Y]^2) + \mu f1'[Y] (f2b'[Y] U'[Y]^3 + \mu U[Y]^3 (-1 + f2b''[Y])) + f1''[Y]$$
  

$$(\mu^2 U[Y]^3 f2b'[Y] + U'[Y] (3 \mu U[Y]^2 + 2 U'[Y]^2) (-1 + f2b''[Y]))) / (\mu U[Y]^2 + U'[Y]^2)^{3/2};$$
  
**Simplify[D[a3b2I2, {y, 2}] - a3b2]**

Out[66]= 0

**Term in  $\varphi^{(0,3)}[T, X]$  : a3d [S]**

In[67]:= **a3d = Collect[Coefficient[a31 /. Rulea,  $\varphi^{(0,3)}[T, X]$ ], {D, C}];**

Extract the contribution that does not contain C

In[68]:= **a3d0 = a3d /. C → 0**

Out[68]= 
$$-U[Y] - U[Y] f2b''[Y] + f2b[Y] U''[Y] + D(-U'[Y] f2b^{(3)}[Y] + f2b'[Y] U^{(3)}[Y])$$

In[69]:= **Integrate[a3d0 + U[Y], y]**

Out[69]= 
$$-U[Y] f2b'[Y] + U'[Y] (f2b[Y] - D f2b''[Y]) + D f2b'[Y] U''[Y]$$

Coefficient in front of C in a3d

```
In[70]:= a3d2 = Improve[ Coefficient[a3d, C] ] ;
```

Mathematica does not integrate this expression but after a few manipulations we get an expression for a3d2 as the sum of two derivatives plus a residual term.

In the residual term,  $f1'[y]$  has CosI symmetry. Its product with  $U[y]U'[y]$  has SinI symmetry with zero mean.

Hence the solvability condition is satisfied for all the terms contributing to a3d

```
In[71]:= a3d2P = D[ (2 μ (μ U[y]^3 + U[y] U'[y]^2)^2 / (μ U[y]^2 + U'[y]^2)^5/2) f1'[y], y] -
D[ (μ U[y]^2 + 2 U'[y]^2) / (μ U[y]^2 + U'[y]^2), {y, 2}] f1[y] - (μ U[y] f1'[y] U'[y]) / (μ U[y]^2 + U'[y]^2);
Simplify[a3d2P - a3d2]
```

```
Out[72]= 0
```

**Term in  $\varphi_0^{(1,1)}[T, X]$  : a3g**

```
In[73]:= a3g = Coefficient[a31, φ0^(1,1)[T, X]]
```

```
Out[73]= -f1''[y]
```

## Verification

Assemble all the contribution found at order 3 plus the linear term in  $\psi_3$  and check the sum against a3

```
In[74]:= a3N = a3g φ0^(1,1)[T, X] + a3d φ0^(0,3)[T, X] +
φ0^(0,1)[T, X] (a3b φ0^(0,2)[T, X]) + a3a φ0^(0,1)[T, X]^3 + L[ψ3[T, X, y]];
Simplify[Together[Expand[a3N - a3 /. Rulea]]]
```

```
Out[75]= 0
```

## Symbolic solution

```
In[76]:= Rule3 = ψ3 → (f3g[#3] φ0^(1,1)[T, X] + f3d[#3] φ0^(0,3)[T, X] +
φ0^(0,1)[T, X] (f3b[#3] φ0^(0,2)[T, X] + f3h[ξ]) + f3a[#3] φ0^(0,1)[T, X]^3 &);
```

f3a has SinI symmetry

f3b has SinP symmetry

f3d has SinI symmetry

f3g has SinI symmetry

f3h has SinI symmetry

## Order 4

Extract order 4 terms from the general expansion, use formal solution to order 0, 1, 2 and 3 equations and perform algebraic simplification.

Need to be put under the form  $\mathcal{L}[\psi^4[T, X, Y]] = \text{second member}$

No attempts to simplify here.

The terms a4g, a4a and a4r require the symmetry assumption to satisfy the solvability condition.

The terms a4l and a4l provide the amplitude equation.

```
In[77]:= a4 =
  Assuming[A > 0 &&  $\theta'[Y] > 0$ , Coefficient[NS2,  $\epsilon$ , 4] /. {Rule0, Rule1, Rule2, Rule3}];
```

Rearrange a4 to prepair extraction

```
In[78]:= a41 = Collect[Expand[a4],
  { $\varphi_0^{(1,1)}[T, X]$ ,  $\varphi_0^{(1,2)}[T, X]$ ,  $\varphi_0^{(0,1)}[T, X]$ ,  $\varphi_0^{(0,2)}[T, X]$ ,  $\varphi_0^{(0,3)}[T, X]$ ,  $\varphi_0^{(0,4)}[T, X]$ }];
```

**Term in  $\varphi_0^{(0,1)}[T, X]^4$  : a4a**

```
In[79]:= a4a = Collect[Coefficient[a41,  $\varphi_0^{(0,1)}[T, X]^4$ ], {D, C}];
```

Contribution that does not contain C.

Can be integrated and satisfies the solvability condition.

```
In[80]:= a4a0 = a4a /. C -> 0
```

```
Out[80]:= f3a(3)[Y]
```

Get the rest of a4a

```
In[81]:= a4a1 = Coefficient[a4a, C];
Simplify[a4a - C a4a1 - a4a0]
```

```
Out[82]:= 0
```

Integrate and check

```
a4a1I = Integrate[a4a1, y];
```

```
a4a1I2 = Integrate[a4a1I, y]
```

In[83]:=

```

a4a1I2a = - (μ^2 ((1 + f1'[y]^2) U[y]^2 - 2 U[y] f1'[y] U'[y] f1''[y] + U[y]^2 (μ + f1''[y]^2))
              ((1 + f1'[y]^2) U'[y]^3 + 4 μ U[y]^3 f1'[y] f1''[y] - 6 U[y] f1'[y] U'[y]^2 f1''[y] +
              U[y]^2 U'[y] (μ - 4 μ f1'[y]^2 + 5 f1''[y]^2))) / (8 (μ U[y]^2 + U'[y]^2)^(7/2));
a4a1I2b = (μ^2 U[y] ((1 + 3 f1'[y]^2) U[y]^2 - 6 U[y] f1'[y] U'[y] f1''[y] + U[y]^2 (μ + 3 f1''[y]^2))
            (-f2a'[y] U'[y] + U[y] f2a''[y])) / (2 (μ U[y]^2 + U'[y]^2)^(5/2));
a4a1I2c = (μ f2a'[y]^2 U'[y]^3 + 2 μ^2 U[y]^3 f3a'[y] f1''[y] + 2 μ^2 U[y]^3 f2a'[y] f2a''[y] +
            3 μ U[y]^2 U'[y] f2a''[y]^2 + 2 U'[y]^3 f2a''[y]^2 +
            6 μ U[y]^2 U'[y] f1''[y] f3a''[y] + 4 U'[y]^3 f1''[y] f3a''[y] +
            2 μ f1'[y] (f3a'[y] U'[y]^3 + μ U[y]^3 f3a''[y])) / (2 (μ U[y]^2 + U'[y]^2)^(3/2));
Simplify[Expand[D[a4a1I2a + a4a1I2b + a4a1I2c, {y, 2}] - a4a1]]

```

Out[86]=

0

**Terms in  $\varphi_0^{(0,1)}[T, X]^2$**

Group of all terms containing a factor  $\varphi_0^{(0,1)}[T, X]^2$

In[87]:=

```

a42 = Coefficient[a41, φ0^(0,1)[T, X]^2];

```

**Term in  $\varphi_0^{(0,1)}[T, X]^2 \varphi_0^{(0,2)}[T, X] : a4c$**

In[88]:=

```

a4c = Collect[Coefficient[a42, φ0^(0,2)[T, X]], {D, C}];

```

Contribution that does not contain C.

Can be integrated and satisfies the solvability condition.

In[89]:=

```

a4c0 = a4c /. C -> 0;
a4c0I = Integrate[a4c0, y]
Solve[a4c0I]

```

Out[90]=

```

2 f2a[y] f1''[y] + (f1[y] - 3 D f1''[y]) f2a''[y] +
f3b''[y] + f2a'[y] (-3 f1'[y] + 2 D f1^(3)[y]) + D f1'[y] f2a^(3)[y]

```

Out[91]=

0

Get the rest of a4c in powers of A

In[92]:=

```

a4c1 = Coefficient[a4c, C];
Simplify[a4c - a4c0 - C a4c1]

```

Out[93]=

0

Integrate and check

```
a4c1I = Improve[Integrate[a4c1, y]];
```

a4c1I2 = Integrate[a4c1I, y]

```
In[94]:= a4c1I2a = (μ² U[y] (- (2 f1[y] f1'[y] + (1 + 3 f1'[y]²) f2b'[y]) U'[y]³ -
      U[y]² U'[y] (2 μ f1[y] f1'[y] + f2b'[y] (μ + 3 f1''[y]²) + 6 f1'[y] f1''[y] (-1 + f2b''[y])) +
      U[y]³ (2 μ f1[y] f1''[y] + (μ + 3 f1''[y]²) (-1 + f2b''[y])) +
      U[y] U'[y]² (-1 + 2 f1[y] f1''[y] + 6 f1'[y] f2b'[y] f1''[y] +
      3 f1'[y]² (-1 + f2b''[y]) + f2b''[y])))) / (2 (μ U[y]² + U'[y]²)⁵/²);
a4c1I2b = (μ² U[y]³ (f3b'[y] f1''[y] + f2b'[y] f2a''[y] + f2a'[y] (-1 + f2b''[y]) +
      f1'[y] f3b''[y]) + U'[y]³ (2 μ f2a[y] + μ f2a'[y] f2b'[y] + μ f1'[y] f3b'[y] -
      2 f2a''[y] + 2 f2a''[y] f2b''[y] + 2 f1''[y] f3b''[y]) + μ U[y]² U'[y]
      (2 μ f2a[y] + 3 (f2a''[y] (-1 + f2b''[y]) + f1''[y] f3b''[y]))) / ((μ U[y]² + U'[y]²)³/²);
Simplify[D[a4c1I2a + a4c1I2b, {y, 2}] - a4c1]
```

Out[96]= 0

**Terms in  $\varphi_0^{(0,1)}[T, X]$**

Group of all terms containing a factor  $\varphi_0^{(0,1)}[T, X]$

```
In[97]:= a43 = Coefficient[a41, φ₀⁽⁰,¹⁾[T, X]];
```

**Term in  $\varphi_0^{(0,1)}[T, X] \varphi_0^{(0,3)}[T, X] : a4g[S]$**

```
In[98]:= a4g = Collect[Coefficient[a43, φ₀⁽⁰,³⁾[T, X]], {D, C}];
```

Contribution that does not contain C.

Can be integrated and satisfies the solvability condition.

```
In[99]:= a4g0 = a4g /. C -> 0;
```

```
In[100]:= a4g0I = Integrate[a4g0, y]
Solve[a4g0I]
```

Out[100]=  $f2b[y] f1''[y] - D f1''[y] f2b''[y] + f3d''[y] + f2b'[y] (-f1'[y] + D f1^{(3)}[y])$

Out[101]= 0

Get the rest of a4g

```
In[102]:= a4g1 = Coefficient[a4g, C];
a4g1 = CoefficientList[Coefficient[a4g, C], A];
Simplify[a4g - a4g0 - C a4g1]
```

Out[104]= 0

This contribution cannot be integrated but, after some manipulations, it is possible to extract an integrable part on which the solvability condition can be tested and a non integrable part for which the solvability condition is obtained due to the

symmetries

In[105]:= **a4g1 = Improve[a4g1];**

In[106]:= **a4g1Pa = -** 
$$\frac{\mu U'[Y]}{\sqrt{\mu U[Y]^2 + U'[Y]^2}} - \frac{U'[Y] (3 \mu U[Y]^2 + 2 U'[Y]^2) f1''[Y]^2}{(\mu U[Y]^2 + U'[Y]^2)^{3/2}} -$$
 
$$\frac{\mu f1'[Y]^2 U'[Y]}{(\mu U[Y]^2 + U'[Y]^2)^{5/2}} (-2 \mu U[Y]^2 U'[Y]^2 + U'[Y]^4 + 3 \mu U[Y]^3 U''[Y]) +$$
 
$$\frac{(2 U'[Y] (3 \mu U[Y] + 4 U''[Y]))}{\sqrt{\mu U[Y]^2 + U'[Y]^2}} f2a'[Y] + \frac{6 \mu U[Y]^2 + 4 U'[Y]^2}{\sqrt{\mu U[Y]^2 + U'[Y]^2}} f2a''[Y];$$
 **a4g1Pb =** 
$$\frac{\mu U[Y] f1'[Y]^2 (3 \mu U[Y]^2 + 6 U'[Y]^2 - 2 U[Y] U''[Y])}{(\mu U[Y]^2 + U'[Y]^2)^{3/2}};$$
 **a4g1Pc =** 
$$(\mu f2b[Y] U'[Y] (\mu U[Y]^2 + U'[Y]^2) + 2 f1'[Y]^2 U'[Y] (\mu U[Y]^2 + U'[Y]^2) - f1[Y] (\mu^2 U[Y]^3 f1'[Y] +$$
 
$$U'[Y] (3 \mu U[Y]^2 + 2 U'[Y]^2) f1''[Y]) + \mu f1'[Y] (f3d'[Y] U'[Y]^3 + \mu U[Y]^3 f3d''[Y]) +$$
 
$$f1''[Y] (\mu^2 U[Y]^3 f3d'[Y] + U'[Y] (3 \mu U[Y]^2 + 2 U'[Y]^2) f3d''[Y])) /$$
 
$$(\mu U[Y]^2 + U'[Y]^2)^{3/2} - \frac{2 (\mu U[Y]^2 + 2 U'[Y]^2)}{\sqrt{\mu U[Y]^2 + U'[Y]^2}} f2a[Y];$$
 **a4g1P = a4g1Pa + D[a4g1Pb, Y] + D[a4g1Pc, {Y, 2}];**  
**Simplify[a4g1 - a4g1P]**

Out[110]:= {0}

All the non integrated terms in a4g1Pa have CosI symmetry and hence sum to zero.

f2a''[Y] has symmetry CosI, its product with a CosP term is CosI and integrates to zero.

f2a'[Y] has SinI symmetry, and U'[Y] U[Y] has SinP symmetry,

hence there are two products CosI SinI SinI and CosI

CosI SinP SinI which have CosI symmetry and integrate to zero.

**Term in  $\varphi_0^{(0,1)}[T, X] \varphi_0^{(1,1)}[T, X]$  : a4h**

In[111]:= **a4h = Collect[Coefficient[a43,  $\varphi_0^{(1,1)}[T, X]$ ], {D, C}];**

Contribution that does not contain C.

Can be integrated and satisfies the solvability condition.

In[112]:= **a4h0 = a4h /. C -> 0**

Out[112]:=  $-2 f2a''[Y] + f3g^{(3)}[Y]$

Get contribution in C, integrate it and check solvability



```
In[113]:= a4h1 = Improve[Coefficient[a4h, C]];
Simplify[a4h - a4h0 - C a4h1] 3
```

```
Out[114]= 0
```

```
a4h1I = Improve[Integrate[a4h1, y]];
a4h1I2 = Integrate[a4h1I, y]
```

Integrate and check

```
In[115]:= a4h1I2 = (μ f1'[y] (f3g'[y] U'[y]^3 + μ U[y]^3 f3g''[y]) +
f1''[y] (μ^2 U[y]^3 f3g'[y] + U'[y] (3 μ U[y]^2 + 2 U'[y]^2) f3g''[y])) / (μ U[y]^2 + U'[y]^2)^{3/2};
Simplify[D[a4h1I2, {y, 2}] - a4h1]
```

```
Out[116]= 0
```

**Term in  $\varphi^{(0,4)}[T, X]$  : a41**  
**(contributes to the amplitude equation)**

```
In[117]:= a41 = Collect[Coefficient[a41, φ0^{(0,4)}[T, X]], {D, C}];
```

Contribution independent of C.

The two terms of a410 are of symmetry CosP, they have no primitive and provide a contribution to the amplitude equation.

```
In[118]:= a410 = a41 /. C -> 0
```

```
Out[118]= -f1[y] U[y] - D f1'[y] U'[y]
```

Now get the coefficient of C. It has no primitive but can be described as a sum of derivatives and residual terms.

```
In[119]:= a411 = Improve[Coefficient[a41, C]];

```

```
In[120]:= a411Pa = (μ U[y]^2 + 2 U'[y]^2) / (μ U[y]^2 + U'[y]^2)^{3/2};
a411Pb = (2 μ U[y]^2) / (μ U[y]^2 + U'[y]^2)^{3/2} f2b[y];
a411Pc = (μ U[y] U'[y] (3 μ U[y]^2 + 5 U'[y]^2 - 2 U[y] U''[y])) / (μ U[y]^2 + U'[y]^2)^{3/2} f2b[y];
a411Pd = (-μ U[y] U'[y]^3 + 3 μ U[y]^2 U'[y] U''[y] + 2 U'[y]^3 U''[y]) / (μ U[y]^2 + U'[y]^2)^{3/2};
a411P = a411Pa + D[a411Pb, {y, 2}] - D[a411Pc, y] - f2b[y] D[a411Pd, y];
Simplify[a411 - a411P]
```

```
Out[125]= 0
```

The first and the fourth term contribute as they are product of trig functions with same symmetry.

Check that nothing has been forgotten

```
In[126]:= Simplify[a41 - a410 - C a411]
```

```
Out[126]= 0
```

**Term in  $\varphi_0^{(1,2)}[T, X] : a_{4n}$   
(contributes to the amplitude equation)**

```
In[127]:= a4n = Collect[Coefficient[a41,  $\varphi_0^{(1,2)}[T, X]$ ], {D}]
```

```
Out[127]= -1 - f2b''[y]
```

The first term makes a contribution to the amplitude equation and the second one satisfies the solvability condition.

**Term in  $\varphi_0^{(0,2)}[T, X]^2 : a_{4o}[S]$**

```
In[128]:= a4o = Collect[Coefficient[a41,  $\varphi_0^{(0,2)}[T, X]^2$ ], {D, C}];
```

The contribution independent of C has a primitive and satisfies the solvability condition

```
In[129]:= a4o0 = a4o /. C -> 0;
a4o0I = Integrate[a4o0, y]
Solve[a4o0I]
```

```
Out[130]= -f1'[y] f2b'[y] + D f1''[y] + (f1[y] - D f1''[y]) f2b''[y] + D f1'[y] f2b(3)[y]
```

```
Out[131]= 0
```

Expand the rest of a4o in power of A

```
In[132]:= a4o1 = Coefficient[a4o, C];
Simplify[a4o - a4o0 - C a4o1]
```

```
Out[133]= 0
```

The term in C cannot be integrated but it can be sorted in several parts

$$\begin{aligned}
\text{In[134]:= } \mathbf{a4o1aP} = & \mathcal{D} \left[ \left( \frac{\mu}{2} f1[y]^2 + 4 f1'[y]^2 \right) \frac{U'[y]}{\sqrt{\mu U[y]^2 + U'[y]^2}} - \frac{2 (\mu U[y]^2 + 2 U'[y]^2)}{\sqrt{\mu U[y]^2 + U'[y]^2}} f2a[y] + \right. \\
& \left( \mu f2b'[y]^2 U'[y]^3 + 2 \mu^2 U[y]^3 f2b'[y] (-1 + f2b''[y]) + U'[y] (3 \mu U[y]^2 + 2 U'[y]^2) \right. \\
& \left. \left. (-2 + f2b''[y]) f2b''[y] \right) \right] / \left( 2 (\mu U[y]^2 + U'[y]^2)^{3/2} \right), \{y, 2\} + \\
& \mathcal{D} [\mu U[y] (6 U'[y]^2 + U[y] (3 \mu U[y] - 2 U''[y])) / (\mu U[y]^2 + U'[y]^2)^{3/2} f1'[y]^2, y]; \\
\mathbf{a4o1bP} = & - (\mu U'[y] (-2 \mu U[y]^2 U'[y]^2 + U'[y]^4 + 3 \mu U[y]^3 U''[y])) / (\mu U[y]^2 + U'[y]^2)^{5/2} \\
& f1'[y]^2 - U'[y] (3 \mu^2 U[y]^4 + 5 \mu U[y]^2 U'[y]^2 + 2 U'[y]^4) / \left( (\mu U[y]^2 + U'[y]^2)^{5/2} \right) f1''[y]^2 + \\
& (4 \mathcal{D} [U'[y]^2 f2a'[y], y] + 6 \mu U[y] \mathcal{D} [U[y] f2a'[y], y]) / \left( \sqrt{\mu U[y]^2 + U'[y]^2} \right);
\end{aligned}$$

It is easy to check that all the terms which are not under the derivative in a4o1bP are with CosI symmetry and integrate to zero

$$\begin{aligned}
\text{In[136]:= } \mathbf{a4o1c} = & (-2 \mu U'[y]^7 + \\
& 3 \mu^2 U[y]^2 U'[y] (-5 U'[y]^4 + 7 U[y] U'[y]^2 U''[y] - 5 U[y]^2 U''[y]^2 + U[y]^2 U'[y] U^{(3)}[y]) + \\
& 3 U[y]^5 \mu^3 (-3 U'[y] U''[y] + U[y] U^{(3)}[y]) - 2 \mu^4 U[y]^6 U'[y]) / \left( 2 (\mu U[y]^2 + U'[y]^2)^{7/2} \right);
\end{aligned}$$

The numerator is a sum of terms with CosI symmetry, which is preserved by the division by the denominator in CosP, integrating a4o1c to zero. Let us check it numerically for some examples.

```

In[143]:= NIntegrate[Evaluate[a4o1c /. {Flow1, μ → 0.5}], {y, 0, 2 π}]
NIntegrate[Evaluate[a4o1c /. {Flow2, μ → 0.5}], {y, 0, 2 π}]
NIntegrate[Evaluate[a4o1c /. {Flow3, μ → 0.5}], {y, 0, 2 π}]

```

```
Out[143]= 0. × 10-13
```

```
Out[144]= 0. × 10-15
```

```
Out[145]= 0. × 10-15
```

Check that a4o1 is reconstructed

```
In[146]:= Simplify[a4o1 - a4o1aP - a4o1bP - a4o1c]
```

```
Out[146]= 0
```

## Verification

```
In[147]:= Simplify[Expand[a4] - a41]
```

```
Out[147]= 0
```

In[153]:=

```

a4NN = a4o  $\varphi_0^{(0,2)}[T, X]^2$  + a4n  $\varphi_0^{(1,2)}[T, X]$  +
      a4l  $\varphi_0^{(0,4)}[T, X]$  +  $\varphi_0^{(0,1)}[T, X]$  (a4g  $\varphi_0^{(0,3)}[T, X]$  + a4h  $\varphi_0^{(1,1)}[T, X]$ ) +
      a4c  $\varphi_0^{(0,1)}[T, X]^2 \varphi_0^{(0,2)}[T, X]$  + a4a  $\varphi_0^{(0,1)}[T, X]^4$  +  $\mathcal{L}[\psi_4[T, X, Y]]$ ;
Simplify[Expand[a4NN - a4l] /. Rulea]

```

Out[154]=

0

## Dump / Recover

## Translation tools
