# Supplementary material for: Large-scale instability of a generalized turbulent Kolmogorov flow
Source: Copernicus journal article supplement (doi:10.5194/npg-16-569-2009), 2009-08-31
Supplement: Supplementary file 3 [file npg-16-569-2009-supplement.zip]

---

# Large-scale linear instability of the Kolmogorov flow with modified viscosity

Bernard Legras  
Laboratoire de Meteorologie Dynamique  
Ecole Normale Supérieure  
24 rue Lhomond  
F-75231 PARIS Cedex 05  
E-mail: legras@lmd.ens.fr  
Barbara Villone  
Istituto di Fisica dello Spazio Interplanetario  
Corso Fiume, 4  
I-10137 TORINO  
E-mail: villone@to.infn.it

Smagorinsky-Clark mixed model + friction

Fluid mechanics streamfunction

Calculations are done in terms of  $U$

Here we modify the scaling to have a temporal term at order 3

$U$  is supposed NOT to have the  $\sin l$  symmetry

Settings

## Last use

In[12]:= `DateList[]`

Out[12]= `{2009, 1, 22, 16, 55, 12.800087}`

## General

In[2]:= `Off[General::spell1]`

## Laplacian

In[3]:=  $\Delta = - \left( \epsilon^2 \partial_{x,x}^2 + \partial_{y,y} \right) \&$

Out[3]=  $- \left( \epsilon^2 \partial_{x,x}^2 + \partial_{y,y} \right) \&$

## Definition of the turbulent viscosity, Smagorinsky-Clark mixed model

Standard version with a heuristic component accounting for the vertical shear

$$\text{In[4]:= } \bar{S} = \sqrt{4 (\epsilon \partial_{x,y} \#)^2 + (\epsilon^2 \partial_{x,x} \# - \partial_{y,y} \#)^2 + \mu (\epsilon \partial_x \#)^2 + \mu (\partial_y \#)^2} \&$$

$$\text{Out[4]= } \sqrt{4 (\epsilon \partial_{x,y} \#1)^2 + (\epsilon^2 \partial_{x,x} \#1 - \partial_{y,y} \#1)^2 + \mu (\epsilon \partial_x \#1)^2 + \mu (\partial_y \#1)^2} \&$$

Dissipation: C in front of the Smagorinsky component, D in front of the Clark component

In standard notations  $C=\Delta^2/12$  and  $D = C_s \Delta^2$

$$\text{In[5]:= } \begin{aligned} DS = & C (\partial_{y,y} (\bar{S}[\#] (-\partial_{y,y} \# + \epsilon^2 \partial_{x,x} \#)) - \\ & \epsilon^2 \partial_{x,x} (\bar{S}[\#] (-\partial_{y,y} \# + \epsilon^2 \partial_{x,x} \#)) - 4 \epsilon^2 \partial_{x,y} (\bar{S}[\#] \partial_{x,y} \#)) + \\ & D (\epsilon \partial_{x,y} \# (\epsilon^4 \partial_{x,x,x,x} \# - \partial_{y,y,y,y} \#) + (\epsilon \partial_{x,y,y,y} \# + \epsilon^3 \partial_{x,x,x,y} \#) (\partial_{y,y} \# - \epsilon^2 \partial_{x,x} \#)) \& \end{aligned}$$

$$\text{Out[5]= } \begin{aligned} C (\partial_{y,y} (\bar{S}[\#1] (-\partial_{y,y} \#1 + \epsilon^2 \partial_{x,x} \#1)) - \\ \epsilon^2 \partial_{x,x} (\bar{S}[\#1] (-\partial_{y,y} \#1 + \epsilon^2 \partial_{x,x} \#1)) - 4 \epsilon^2 \partial_{x,y} (\bar{S}[\#1] \partial_{x,y} \#1)) + \\ D (\epsilon \partial_{x,y} \#1 (\epsilon^4 \partial_{x,x,x,x} \#1 - \partial_{y,y,y,y} \#1) + (\epsilon \partial_{x,y,y,y} \#1 + \epsilon^3 \partial_{x,x,x,y} \#1) (\partial_{y,y} \#1 - \epsilon^2 \partial_{x,x} \#1)) \& \end{aligned}$$

Reference

Pope, S.B. Turbulent flows, C.U.P., 2000

## Definition of the modified Kolmogorov Flow

### Velocity and streamfunction

$$U[y_] := A \sin[\theta[y]]$$

$$\text{In[6]:= } \Phi[y_] := \text{Integrate}[U[s], \{s, 0., y\}]$$

### Examples of flows

Standard Kolmogorov flow in Flow1, "flat" flow in Flow2, intermediate case in Flow3

$$\text{In[150]:= } \begin{aligned} \text{Flow2} &= U \rightarrow \text{Evaluate} \left[ \sin \left[ \# + \frac{1}{2} \sin[2\#] \right] \& \right]; \\ \text{Flow1} &= U \rightarrow \text{Evaluate} [\sin[\#] \&]; \\ \text{Flow3} &= U \rightarrow \text{Evaluate} \left[ \sin \left[ \# + \frac{1}{4} \sin[2\#] \right] \& \right]; \end{aligned}$$

## Plots of the flow

```
p1 = Plot[U[y] /. {Flow1, A → 1}, {y, -2 π, 2 π}, DisplayFunction → Identity];
p2 = Plot[U[y] /. {Flow2, A → 1}, {y, -2 π, 2 π}, DisplayFunction → Identity];
p3 = Plot[U[y] /. {Flow3, A → 1}, {y, -2 π, 2 π}, DisplayFunction → Identity];
Show[GraphicsRow[{p1, p2, p3}]]
```

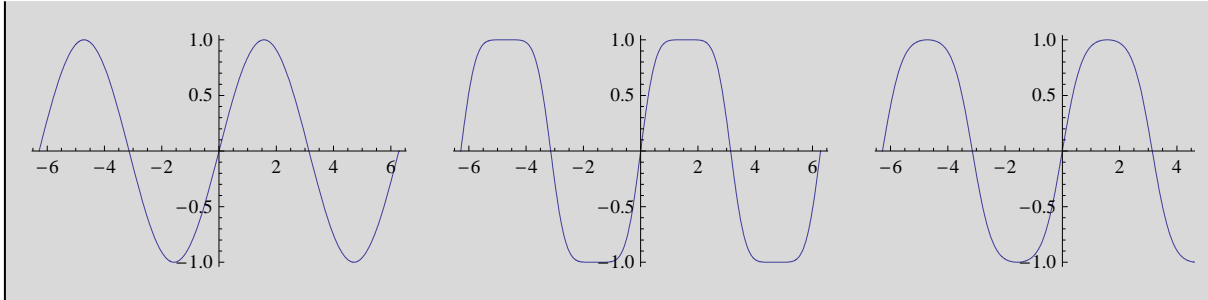

## Plots of the streamfunction

### Plots of the forcing (or dissipation)

Forcing is calculated to equilibrate the dissipation since there is no advection for a flow that depends only on  $y$ . Some arbitrary values are assumed for the parameters

```
Forcing = Assuming[A > 0 && θ'[y] > 0, Simplify[DS[ϕ[y]]]]
```

$$-\frac{1}{(\mu U[y]^2 + U'[y]^2)^{3/2}} \\ C (\mu U'[y]^5 + 3\mu U[y]^2 U'[y] U''[y] (\mu U[y] + U''[y]) + U'[y]^3 U''[y] (\mu U[y] + 2 U''[y]) + \\ \mu^2 U[y]^4 U^{(3)}[y] + 3\mu U[y]^2 U'[y]^2 U^{(3)}[y] + 2 U'[y]^4 U^{(3)}[y])$$

Setting  $\mu \rightarrow 0$ . shows that Flow1 requires a forcing with discontinuities that disappear in Flow2 and Flow3.

```
p1 = Plot[Forcing /. {Flow1, A → 1, C → 1, μ → 0.}, {y, -2 π, 2 π}, PlotRange → All, DisplayFunction → Identity];
p2 = Plot[Forcing /. {Flow2, A → 1, C → 1, μ → 0.}, {y, -2 π, 2 π}, PlotRange → All, DisplayFunction → Identity];
p3 = Plot[Forcing /. {Flow3, A → 1, C → 1, μ → 0.}, {y, -2 π, 2 π}, PlotRange → All, DisplayFunction → Identity];
Show[GraphicsRow[{p1, p2, p3}]]
```

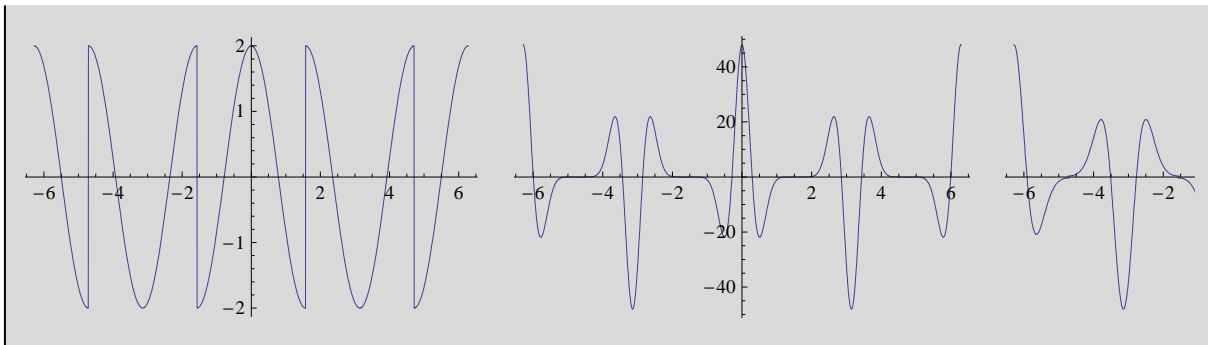

Setting  $\mu \rightarrow 0.5$  shows that the discontinuities disappear in Flow1, while the forcings in Flow2 and Flow3 are hardly modified

```

p1 = Plot[ Forcing /. {Flow1, A → 1, C → 1, μ → 0.5},
  {y, -2 π, 2 π}, PlotRange → All, DisplayFunction → Identity];
p2 = Plot[ Forcing /. {Flow2, A → 1, C → 1, μ → 0.5}, {y, -2 π, 2 π},
  PlotRange → All, DisplayFunction → Identity];
p3 = Plot[ Forcing /. {Flow3, A → 1, C → 1, μ → 0.5}, {y, -2 π, 2 π},
  PlotRange → All, DisplayFunction → Identity];
Show[GraphicsRow[{p1, p2, p3}]]

```

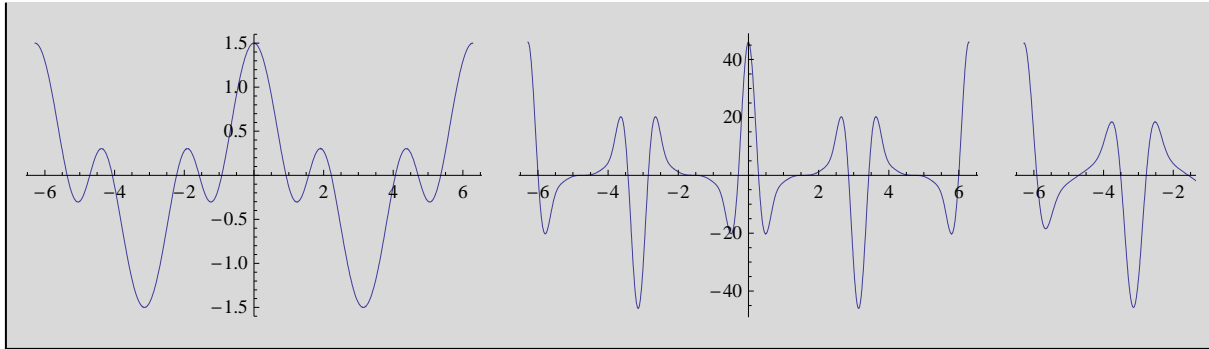

## Definition of the perturbation problem

### 2D Navier-Stokes with scaling

We have taken  $u = \partial_y \psi$  and  $v = -\partial_x \psi$  (definition used in fluid mechanics, opposite to the convention in GFD)

The temporal term has its order lowered with respect to the standard calculation.

```

In[7]:= NS = ε ∂_T Δ[ψ[T, X, Y]] - ε ∂_X ψ[T, X, Y] ∂_Y Δ[ψ[T, X, Y]] +
  ε ∂_Y ψ[T, X, Y] ∂_X Δ[ψ[T, X, Y]] - DS[ψ[T, X, Y]] + DS[ϕ[Y]];

```

### Expansion

The streamfunction is expanded up to the fourth order in  $\epsilon$

```

In[8]:= ψ[T_, X_, Y_] :=
  ϕ[Y] + ψ0[T, X, Y] + ε ψ1[T, X, Y] + ε^2 ψ2[T, X, Y] + ε^3 ψ3[T, X, Y] + ε^4 ψ4[T, X, Y]

```

```

In[9]:= NS2 = Collect[Normal[Series[NS, {ε, 0, 4}]], ε];

```

## Order 0

Extract order 0 terms from the general expansion and perform algebraic simplification.

Fairly lengthy expression anyway.

```

In[13]:= a0 = Simplify[Coefficient[NS2, ε, 0]]

```

### Symbolic solution

The 0 th order solution satisfies  $a0 = 0$  as soon as it does not depend on the fast variable  $y$

```
In[32]:= Rule0 =  $\psi_0 \rightarrow (\varphi_0[\#1, \#2] \&)$ 
```

```
Out[32]:=  $\psi_0 \rightarrow (\varphi_0[\#1, \#2] \&)$ 
```

## Verification

Check that  $\varphi_0[X,T]$  satisfies the 0 th order solution

```
In[15]:= FullSimplify[a0 /. {Rule0}]
```

```
Out[15]:= 0
```

## Useful rules for simplifications

```
In[16]:= Improve = Simplify[Together[#1]] &
```

```
Out[16]:= Simplify[Together[#1]] &
```

Periodicity in space

```
In[17]:= Solva[expr_] := ((expr /. y -> 2  $\pi$ ) - (expr /. y -> 0)) /. g___[2  $\pi$ ] -> g[0]
```

## Order 1

Extract order 1 terms from the general expansion, use formal solution to order 0 equation and perform algebraic simplification.  
Need to be put under the form  $\mathcal{L}[\psi_1[T, X, Y]] = \text{second member}$

```
In[20]:= a1 = Simplify[Expand[Coefficient[NS2,  $\epsilon$ , 1]] /. Rule0];
```

## Extraction of the linear operator and verification

First derivative of  $\psi$  lin y

```
In[21]:= a1f1 = FullSimplify[Coefficient[a1,  $\psi_1^{(0,0,1)}[T, X, Y]$ ], Trig -> True]
```

```
Out[21]= 
$$\frac{1}{(\mu U[Y]^2 + U'[Y]^2)^{5/2}} C \mu (-3 \mu U[Y] U'[Y]^5 + 7 \mu U[Y]^2 U'[Y]^3 U''[Y] + U'[Y]^5 U''[Y] + \mu^2 U[Y]^5 U^{(3)}[Y] + \mu U[Y]^3 U'[Y] (-3 U''[Y]^2 + U'[Y] U^{(3)}[Y]))$$

```

Second derivative of  $\psi$  lin y

In[22]:= **a1F2 = FullSimplify[Coefficient[a1,  $\psi_1^{(0,0,2)}$ [T, X, Y]], Trig → True]**

Out[22]= 
$$\frac{1}{(\mu U[Y]^2 + U'[Y]^2)^{5/2}} C \left( 3 \mu^3 U[Y]^5 U''[Y] - 3 \mu^2 U[Y]^3 U'[Y]^2 U''[Y] + 5 \mu U[Y]^2 U'[Y]^3 (\mu U'[Y] + U^{(3)}[Y]) + 2 U'[Y]^5 (\mu U'[Y] + U^{(3)}[Y]) + 3 \mu^2 U[Y]^4 (U''[Y]^2 + U'[Y] U^{(3)}[Y]) \right)$$

Third derivative of  $\psi$  lin y

In[23]:= **a1F3 = Factor[Simplify[Coefficient[a1,  $\psi_1^{(0,0,3)}$ [T, X, Y]]]]**

Out[23]= 
$$\frac{C U'[Y] (3 \mu^2 U[Y]^3 + \mu U[Y] U'[Y]^2 + 6 \mu U[Y]^2 U''[Y] + 4 U'[Y]^2 U''[Y])}{(\mu U[Y]^2 + U'[Y]^2)^{3/2}}$$

Fourth derivative of  $\psi$  lin y

In[24]:= **a1F4 = Factor[Simplify[Coefficient[a1,  $\psi_1^{(0,0,4)}$ [T, X, Y]]]]**

Out[24]= 
$$\frac{C (\mu U[Y]^2 + 2 U'[Y]^2)}{\sqrt{\mu U[Y]^2 + U'[Y]^2}}$$

Complete form of  $\mathcal{L}$  and verification against the terms extracted from a1

In[25]:= 
$$\mathcal{L}[f_] := C \partial_{y,y} \left( \frac{(\mu U[Y]^2 + 2 U'[Y]^2)}{\sqrt{\mu U[Y]^2 + U'[Y]^2}} \partial_{y,y} f \right) + C \mu \partial_{y,y} \left( \frac{U[Y] U'[Y]}{\sqrt{\mu U[Y]^2 + U'[Y]^2}} \partial_y f \right)$$

In[26]:= **Simplify[ $\mathcal{L}[f[Y]] - a1F1 f^{(1)}[Y] - a1F2 f^{(2)}[Y] - a1F3 f^{(3)}[Y] - a1F4 f^{(4)}[Y]$ , Trig → True]**

Out[26]= 0

### Extraction of second member: a1a

The second member contains only the first derivative in X of the 0th order solution

In[27]:= **a1a = -Simplify[Coefficient[a1,  $\varphi_0^{(0,1)}$ [T, X]]]**

Out[27]=  $-U''[Y]$

### Reconstruction of the first order equation

We check here that the first order equation is  $\mathcal{L}[\psi_1[T, X, Y]] = -U''[Y] \varphi_0^{(0,1)}[T, X]$

```
In[28]:= a1N =  $\mathcal{L}[\psi_1[T, X, Y]] - a_1 a \varphi_0^{(0,1)}[T, X];$ 
```

```
In[29]:= Simplify[a1N - a1]
```

```
Out[29]= 0
```

## Symbolic solution

This solution is meant to replace  $\psi$  in further formal steps of the perturbative expansion

```
In[33]:= Rule1 =  $\psi_1 \rightarrow (f_1[\#3] \varphi_0^{(0,1)}[\#1, \#2] \&);$ 
```

Notice that  $f_1$  has  $\text{SinI}$  symmetry

## Numerical solution [TO BE ADAPTED]

## Order 2

Extract order 2 terms from the general expansion, use formal solution to order 0 and 1 equations and perform algebraic simplification.

Need to be put under the form  $\mathcal{L}[\psi_2[T, X, Y]] = \text{second member}$

```
In[34]:= a2 = Simplify[Coefficient[NS2,  $\epsilon$ , 2] /. {Rule0, Rule1}];
```

## Extraction of second member and solvability

Here we extract the terms of the second member, factor per factor, and we test the solvability condition

**term in factor of  $\varphi_0^{(0,1)}[T, X]^2 : a_2 a$**

```
In[35]:= a2a = Collect[-Simplify[Coefficient[a2,  $\varphi_0^{(0,1)}[T, X], 2]$ , {A, D, C}];
```

Check that this simplification can be somewhat improved for the term which is not in factor of C

```
In[36]:= Simplify[a2a /. C  $\rightarrow$  0]
```

```
Out[36]= -f1(3)[Y]
```

This term integrates twice in y and satisfies the solvability condition

```
In[37]:= a2a1 = Coefficient[a2a, C];
```

```
a2a1I = Integrate[a2a1, y];
```

```
a2a1I2 = Integrate[a2a1, y]
```

```
In[38]:= a2a1I2 = -1/2 ( (2 μ^2 U[y]^3 f1'[y] f1''[y] + U'[y]^3 (μ + μ f1'[y]^2 + 2 f1''[y]^2) +
      μ U[y]^2 U'[y] (μ + 3 f1''[y]^2) ) / (μ U[y]^2 + U'[y]^2)^(3/2) );
Simplify[D[a2a1I2, {y, 2}] - a2a1]
```

```
Out[39]= 0
```

**term in factor of  $\varphi^{(0,2)}[T, X] : a2b$**

```
In[40]:= a2b = -Collect[Simplify[Coefficient[a2, φ0^(0,2)[T, X], 1]], {A, D, C}]
```

Split it in several part for integration. First isolate the part that does not depend on C and D and integrate it once.

```
In[41]:= a2b0 = a2b /. {D → 0, C → 0};
a2b1I = Integrate[a2b0, y]
```

```
Out[42]= U[y] f1'[y] - f1[y] U'[y]
```

Then isolate the factor of C and checks it integrates twice

```
In[43]:= a2b1 = Coefficient[a2b, C];
```

```
a2b2I2 = Integrate[Integrate[a2b1, y], y]
```

```
In[44]:= a2b2I2 = (μ U[y]^2 + 2 U'[y]^2) /
      Sqrt[μ U[y]^2 + U'[y]^2];
Simplify[D[a2b2I2, {y, 2}] - a2b1]
```

```
Out[45]= 0
```

Isolate the factor of D and integrate it once

```
In[46]:= a2b2 = Coefficient[a2b, D];
a2b0I = Integrate[a2b2, y]
```

```
Out[47]= U'[y] f1''[y] - f1'[y] U''[y]
```

Complete the solvability proof for a2b by check that nothing has been forgotten in a2b

```
In[48]:= Simplify[a2b - a2b0 - C a2b1 - D a2b2]
```

```
Out[48]= 0
```



**term in factor of  $\varphi_0^{(1,1)}[T, X]$  : a2d**

```
In[56]:= a2d = -Simplify[Coefficient[a2,  $\varphi_0^{(1,1)}[T, X]$ , 1]]
```

```
Out[56]:= f1''[Y]
```

## Reconstruction of the second order equation

Check that nothing has been forgotten in the extraction of the components of a2

```
In[70]:= a2N =  $\mathcal{L}[\psi_2[T, X, Y]] - a2b \varphi_0^{(0,2)}[T, X] - a2a \varphi_0^{(0,1)}[T, X]^2 - a2d \varphi_0^{(1,1)}[T, X];$   
Simplify[a2N - a2]
```

```
Out[71]:= 0
```

## Symbolic solution

```
In[59]:= Rule2 =  $\psi_2 \rightarrow \left( f2a[\#3] \varphi_0^{(0,1)}[\#1, \#2]^2 + f2b[\#3] \varphi_0^{(0,2)}[\#1, \#2] + f2d \varphi_0^{(1,1)}[T, X] \& \right)$ 
```

```
Out[59]:=  $\psi_2 \rightarrow \left( f2a[\#3] \varphi_0^{(0,1)}[\#1, \#2]^2 + f2b[\#3] \varphi_0^{(0,2)}[\#1, \#2] + f2d \varphi_0^{(1,1)}[T, X] \& \right)$ 
```

f2a has CosI symmetry

f2b has CosP symmetry

f2d has SinI symmetry

---

## Order 3

Extract order 3 terms from the general expansion, use formal solution to order 0, 1 and 2 equations and perform algebraic simplification.

Need to be put under the form  $\mathcal{L}[\psi_3[T, X, Y]] = \text{second member}$

No attempts to simplify here

```
In[60]:= a3 = Coefficient[NS2,  $\epsilon$ , 3] /. {Rule0, Rule1, Rule2};
```

## Extraction of second member and solvability

First reorganize a3 in order to make further extraction easier

```
In[61]:= a31 = Collect[Expand[a3], { $\varphi_0^{(1,1)}[T, X]$ ,  $\varphi_0^{(0,1)}[T, X]$ ,  $\varphi_0^{(0,2)}[T, X]$ ,  $\varphi_0^{(0,3)}[T, X]$ }]
```

**Term in  $\varphi_0^{(0,1)}[T, X]^3$  : a3a**

**Terms in factor of  $\varphi_0^{(0,1)}[T, X]$**

**Term in  $\varphi_0^{(0,1)}[T, X] \varphi_0^{(0,2)}[T, X]$  : a3b**

**Term in  $\varphi_0^{(0,3)}[T, X]$  : a3d [S]**

```
In[81]:= a3d = Collect[Coefficient[a31,  $\varphi_0^{(0,3)}[T, X]$ ], {D, C}];
```

Extract the contribution that does not contain C

```
In[82]:= a3d0 = a3d /. C -> 0
```

```
Out[82]:= -U[Y] - U[Y] f2b''[Y] + f2b[Y] U''[Y] + D (-U'[Y] f2b(3)[Y] + f2b'[Y] U(3)[Y])
```

```
In[83]:= Integrate[a3d0 + U[Y], Y]
```

```
Out[83]:= -U[Y] f2b'[Y] + U'[Y] (f2b[Y] - D f2b''[Y]) + D f2b'[Y] U''[Y]
```

Coefficient in front of C in a3d

```
In[84]:= a3d2 = Improve[Coefficient[a3d, C]];
```

Mathematica does not integrate this expression but after a few manipulations we get an expression for a3d2 as the sum of two derivatives plus a residual term.

The residual term does not vanish in general in the absence of symmetry but we notice that it is in factor of  $\mu$  and hence disappears in the  $\mu \rightarrow 0$  limit

```
In[85]:= a3d2P = D[ $\frac{2 \mu (\mu U[Y]^3 + U[Y] U'[Y]^2)^2}{(\mu U[Y]^2 + U'[Y]^2)^{5/2}} f1'[Y], Y] -$   

 $D[\frac{\mu U[Y]^2 + 2 U'[Y]^2}{\sqrt{\mu U[Y]^2 + U'[Y]^2}}, \{Y, 2\}] f1[Y] - \frac{\mu U[Y] f1'[Y] U'[Y]}{\sqrt{\mu U[Y]^2 + U'[Y]^2}};$   

Simplify[a3d2P - a3d2]
```

```
Out[86]:= 0
```

**Term in  $\varphi_0^{(1,1)}[T, X]$   $\varphi_0^{(0,1)}[T, X]$  : a3g**

```
In[89]:= a3g = Coefficient[a33,  $\varphi_0^{(1,1)}[T, X]$ ]
```

```
Out[89]:= -2 f2a''[Y]
```

**Term in  $\varphi_0^{(1,2)}[T, X]$  : a3h**

```
In[92]:= a3h = Coefficient[a31,  $\varphi_0^{(1,2)}[T, X]$ ]
```

```
Out[92]:= -1 - f2b''[Y]
```

This term generates a contribution to the amplitude equation

## Amplitude equation

The amplitude equation at this stage is

$$\partial_T \varphi_0 + \frac{\mu U[Y] f_1'[Y] U'[Y]}{\sqrt{\mu U[Y]^2 + U'[Y]^2}} > \partial_X \varphi_0 = 0$$

It is purely propagative and hence cannot produce an instability per se. It is still necessary to go to higher order. Also we see that the propagative effect is proportional to  $\mu$  that we want to be small.

## Verification

Assemble all the contribution found at order 3 plus the linear term in  $\psi_3$  and check the sum against  $a_3$

```
In[95]:= a3N = a3g  $\varphi_0^{(0,1)}[T, X] \varphi_0^{(1,1)}[T, X]$  + a3d  $\varphi_0^{(0,3)}[T, X]$  +  
a3b  $\varphi_0^{(0,1)}[T, X] \varphi_0^{(0,2)}[T, X]$  + a3a  $\varphi_0^{(0,1)}[T, X]^3$  + a3h  $\varphi_0^{(1,2)}[T, X]$  +  $\mathcal{L}[\psi_3[T, X, Y]]$ ;  
Simplify[Together[Expand[a3N - a3]]]
```

```
Out[96]:= 0
```

## Symbolic solution

```
In[97]:= Rule3 =  $\psi_3 \rightarrow \left( f3g[\#3] \varphi_0^{(1,1)}[T, X] + f3d[\#3] \varphi_0^{(0,3)}[T, X] + \right.$   
 $\left. f3b[\#3] \varphi_0^{(0,1)}[T, X] \varphi_0^{(0,2)}[T, X] + f3a[\#3] \varphi_0^{(0,1)}[T, X]^3 + f3h \varphi_0^{(1,2)}[T, X] \right);$ 
```

f3a has SinI symmetry  
f3b has SinP symmetry  
f3d has SinI symmetry  
f3g has SinI symmetry  
f3h has CosP symmetry

## Order 4

Extract order 4 terms from the general expansion, use formal solution to order 0, 1, 2 and 3 equations and perform algebraic simplification.

Need to be put under the form  $\mathcal{L}[\psi_4[T, X, Y]] = \text{second member}$

No attempts to simplify here

```
In[98]:= a4 =  
Assuming[A > 0 &&  $\theta'[Y] > 0$ , Coefficient[NS2,  $\epsilon$ , 4] /. {Rule0, Rule1, Rule2, Rule3}];
```

Rearrange a4 to prepair extraction

```
In[99]:= a41 = Collect[Expand[a4], { $\varphi_0^{(1,1)}[T, X]$ ,  $\varphi_0^{(1,2)}[T, X]$ ,  
 $\varphi_0^{(0,1)}[T, X]$ ,  $\varphi_0^{(0,2)}[T, X]$ ,  $\varphi_0^{(0,3)}[T, X]$ ,  $\varphi_0^{(0,4)}[T, X]$ ,  $\varphi_1^{(0,1)}[T, X]$ }];
```

Term in  $\varphi_0^{(0,1)}[T, X]^4$  : a4a

Terms in  $\varphi_0^{(0,1)}[T, X]^2$

**Term in  $\varphi_0^{(0,1)}[T, X]^2 \varphi_0^{(0,2)}[T, X] : a_4c$**

**Terms in  $\varphi_0^{(0,1)}[T, X]$**

**Term in  $\varphi_0^{(0,1)}[T, X] \varphi_0^{(0,3)}[T, X] : a_4g[S]$**

```
In[173]:= a4g = Collect[Coefficient[a43,  $\varphi_0^{(0,3)}[T, X]$ ], {D, C}];
```

Contribution that does not contain C.

Can be integrated and satisfies the solvability condition.

```
In[174]:= a4g0 = a4g /. C -> 0;
```

```
In[175]:= a4gOI = Integrate[a4g0, y]
          Solva[a4gOI]
```

```
Out[175]= f2b[y] f1''[y] - D f1''[y] f2b''[y] + f3d''[y] + f2b'[y] (-f1'[y] + D f1(3)[y])
```

```
Out[176]= 0
```

Get the rest of a4g

```
In[185]:= a4g1 = Coefficient[a4g, C];
          a4g1 = CoefficientList[Coefficient[a4g, C], A];
          Simplify[a4g - a4g0 - C a4g1]
```

```
Out[187]= 0
```

This contribution cannot be integrated but, after some manipulations, it is possible to extract an integrable part on which the solvability condition can be tested and a non integrable part for which the solvability condition is obtained due to the symmetries

```
In[188]:= a4g1 = Improve[a4g1];
```

In[189]:=

```

a4g1Pa = - 
$$\frac{\mu U'[Y]}{\sqrt{\mu U[Y]^2 + U'[Y]^2}} - \frac{U'[Y] (3 \mu U[Y]^2 + 2 U'[Y]^2) f1''[Y]^2}{(\mu U[Y]^2 + U'[Y]^2)^{3/2}} -$$


$$\frac{\mu f1'[Y]^2 U'[Y]}{(\mu U[Y]^2 + U'[Y]^2)^{5/2}} \left( -2 \mu U[Y]^2 U'[Y]^2 + U'[Y]^4 + 3 \mu U[Y]^3 U''[Y] \right) +$$


$$\frac{(2 U'[Y] (3 \mu U[Y] + 4 U''[Y]))}{\sqrt{\mu U[Y]^2 + U'[Y]^2}} f2a'[Y] + \frac{6 \mu U[Y]^2 + 4 U'[Y]^2}{\sqrt{\mu U[Y]^2 + U'[Y]^2}} f2a''[Y];$$

a4g1Pb = 
$$\frac{\mu U[Y] f1'[Y]^2 (3 \mu U[Y]^2 + 6 U'[Y]^2 - 2 U[Y] U''[Y])}{(\mu U[Y]^2 + U'[Y]^2)^{3/2}};$$

a4g1Pc =

$$\left( \mu f2b[Y] U'[Y] (\mu U[Y]^2 + U'[Y]^2) + 2 f1'[Y]^2 U'[Y] (\mu U[Y]^2 + U'[Y]^2) - f1[Y] (\mu^2 U[Y]^3 f1'[Y] + \right.$$


$$U'[Y] (3 \mu U[Y]^2 + 2 U'[Y]^2) f1''[Y]) + \mu f1'[Y] (f3d'[Y] U'[Y]^3 + \mu U[Y]^3 f3d''[Y]) +$$


$$f1''[Y] (\mu^2 U[Y]^3 f3d'[Y] + U'[Y] (3 \mu U[Y]^2 + 2 U'[Y]^2) f3d''[Y]) \Big) /$$


$$\left( \mu U[Y]^2 + U'[Y]^2 \right)^{3/2} - \frac{2 (\mu U[Y]^2 + 2 U'[Y]^2)}{\sqrt{\mu U[Y]^2 + U'[Y]^2}} f2a[Y];$$

a4g1P = a4g1Pa + D[a4g1Pb, Y] + D[a4g1Pc, {Y, 2}];
Simplify[a4g1 - a4g1P]

```

Out[193]:=

0

In general and in the absence of symmetries,  
the term a4g1Pa does not integrate to zero over  $[0, 2\pi]$ ,  
hence it contributes to the amplitude equation. In the limit  $\mu \rightarrow 0$ , this term is

$$- \frac{2 U'[Y]^3 f1''[Y]^2}{(U'[Y]^2)^{3/2}} + 4 \sqrt{U'[Y]^2} f2a''[Y] + \frac{8 f2a'[Y] U'[Y] U''[Y]}{\sqrt{U'[Y]^2}}$$

**Term in  $\varphi_0^{(0,1)}[T, X] \varphi_0^{(1,1)}[T, X]$  : a4h**

**Term in  $\varphi_0^{(0,4)}[T, X]$  : a4l  
(contributes to the amplitude equation)**

In[127]:=

```

a4l = Collect[Coefficient[a4l,  $\varphi_0^{(0,4)}[T, X]$ ], {D, C}];

```

Contribution independent of C.

The two terms of a4l0 are of symmetry CosP, they have no primitive and provide a contribution to the amplitude equation.

In[128]:=

```

a4l0 = a4l /. C -> 0

```

Out[128]:=

```

-f1[Y] U[Y] - D f1'[Y] U'[Y]

```

Now get the coefficient of C. It has no primitive but can be described as a sum of derivatives and residual terms.

In[129]:=

```

a4l1 = Improve[Coefficient[a4l, C]];

```

In[130]:=

```

a411Pa = 
$$\frac{\mu U[y]^2 + 2 U'[y]^2}{\sqrt{\mu U[y]^2 + U'[y]^2}};$$

a411Pb = 
$$\frac{2 \mu U[y]^2}{\sqrt{\mu U[y]^2 + U'[y]^2}} f2b[y];$$

a411Pc = 
$$\frac{\mu U[y] U'[y] (3 \mu U[y]^2 + 5 U'[y]^2 - 2 U[y] U''[y])}{(\mu U[y]^2 + U'[y]^2)^{3/2}} f2b[y];$$

a411Pd = 
$$\frac{-\mu U[y] U'[y]^3 + 3 \mu U[y]^2 U'[y] U''[y] + 2 U'[y]^3 U''[y]}{(\mu U[y]^2 + U'[y]^2)^{3/2}};$$

a411P = a411Pa + D[a411Pb, {y, 2}] - D[a411Pc, y] - f2b[y] D[a411Pd, y];
Simplify[a411 - a411P]

```

Out[135]=

0

The first and the fourth term contribute as they are product of trig functions with same symmetry.

Check that nothing has been forgotten

In[136]:=

```
Simplify[a41 - a410 - C a411]
```

Out[136]=

0

**Term in  $\varphi_0^{(1,2)}[T, X]$  : a4n**

In[137]:=

```
a4n = Collect[Coefficient[a41,  $\varphi_0^{(1,2)}[T, X]$ ], {D}]
```

Out[137]=

0

No contribution of that sort

**Term in  $\varphi_0^{(0,2)}[T, X]^2$  : a4o [S]**

In[138]:=

```
a4o = Collect[Coefficient[a41,  $\varphi_0^{(0,2)}[T, X]^2$ ], {D, C}];
```

The contribution independent of C has a primitive and satisfies the solvability condition

In[139]:=

```

a4o0 = a4o /. C -> 0;
a4o0I = Integrate[a4o0, y]
Solve[a4o0I]

```

Out[140]=

```
-f1'[y] f2b'[y] + D f1''[y] + (f1[y] - D f1''[y]) f2b''[y] + D f1'[y] f2b(3)[y]
```

Out[141]=

0

Expand the rest of a4o in power of A

```
In[142]:= a4o1 = Coefficient[a4o, C];
Simplify[a4o - a4o0 - C a4o1]
```

```
Out[143]= 0
```

The term in C cannot be integrated but it can be sorted in several parts

```
In[144]:= a4o1aP = D[ (μ f1[y]^2 + 4 f1'[y]^2) * (U'[y] / (sqrt(μ U[y]^2 + U'[y]^2)) - (2 (μ U[y]^2 + 2 U'[y]^2) / (sqrt(μ U[y]^2 + U'[y]^2)) f2a[y] +
(μ f2b'[y]^2 U'[y]^3 + 2 μ^2 U[y]^3 f2b'[y] (-1 + f2b''[y]) + U'[y] (3 μ U[y]^2 + 2 U'[y]^2)
(-2 + f2b''[y]) f2b''[y]) / (2 (μ U[y]^2 + U'[y]^2)^(3/2)), {y, 2}] +
D[μ U[y] (6 U'[y]^2 + U[y] (3 μ U[y] - 2 U''[y])) / (μ U[y]^2 + U'[y]^2)^(3/2) f1'[y]^2, y];
a4o1bP = - (μ U'[y] (-2 μ U[y]^2 U'[y]^2 + U'[y]^4 + 3 μ U[y]^3 U''[y])) / (μ U[y]^2 + U'[y]^2)^(5/2)
f1'[y]^2 - U'[y] (3 μ^2 U[y]^4 + 5 μ U[y]^2 U'[y]^2 + 2 U'[y]^4) / ((μ U[y]^2 + U'[y]^2)^(5/2)) f1''[y]^2 +
(4 D[U'[y]^2 f2a'[y], y] + 6 μ U[y] D[U[y] f2a'[y], y]) / (sqrt(μ U[y]^2 + U'[y]^2));
```

It is easy to check that all the terms which are not under the derivative in a4o1bP are with CosI symmetry and integrate to zero

```
In[146]:= a4o1c = (-2 μ U'[y]^7 +
3 μ^2 U[y]^2 U'[y] (-5 U'[y]^4 + 7 U[y] U'[y]^2 U''[y] - 5 U[y]^2 U''[y]^2 + U[y]^2 U'[y] U^(3)[y]) +
3 U[y]^5 μ^3 (-3 U'[y] U''[y] + U[y] U^(3)[y]) - 2 μ^4 U[y]^6 U'[y]) / (2 (μ U[y]^2 + U'[y]^2)^(7/2));
```

The numerator is a sum of terms with CosI symmetry, which is preserved by the division by the denominator in CosP, integrating a4o1c to zero. Let us check it numerically for some examples.

```
In[153]:= NIntegrate[Evaluate[a4o1c /. {Flow1, μ -> 0.5}], {y, 0, 2 π}]
NIntegrate[Evaluate[a4o1c /. {Flow2, μ -> 0.5}], {y, 0, 2 π}]
NIntegrate[Evaluate[a4o1c /. {Flow3, μ -> 0.5}], {y, 0, 2 π}]
```

```
Out[153]= 0. × 10-13
```

```
Out[154]= 0. × 10-15
```

```
Out[155]= 0. × 10-15
```

**Chck that a4o1 is reconstructed**

```
Simplify[a4o1 - a4o1aP - a4o1bP - a4o1c]
```

```
0
```

**Term in  $\varphi_0^{(1,3)}[T, X]$  : a4p**

```
In[182]:= a4p = Coefficient[a41,  $\varphi_0^{(1,3)}[T, X]$ ]
```

```
Out[182]:= -f1[y]
```

## Verification

```
a4NN = a4p  $\varphi_0^{(1,3)}[T, X]$  + a4o  $\varphi_0^{(0,2)}[T, X]^2$  +  

  a4l  $\varphi_0^{(0,4)}[T, X]$  +  $\varphi_0^{(0,1)}[T, X]$  (a4g  $\varphi_0^{(0,3)}[T, X]$  + a4h  $\varphi_0^{(1,1)}[T, X]$ ) +  

   $\varphi_0^{(0,1)}[T, X]^2$  (a4c  $\varphi_0^{(0,2)}[T, X]$ ) + a4a  $\varphi_0^{(0,1)}[T, X]^4$  +  $\mathcal{L}[\psi_4[T, X, y]]$ ;  

  Simplify[Expand[a4NN - a41]]
```

```
Out[206]:= 0
```

**Analysis of the contributions to the amplitude equation**

The contribution to the amplitude equation which have been identified at order 4 are

$$C < a4o1c + a4o1bP > \varphi_0^{(0,2)}[T, X]^2 + C < a4g1Pa > \varphi_0^{(0,1)}[T, X] \varphi_0^{(0,3)}[T, X] + < -f1[y] U[y] - D f1'[y] U'[y] + (a4l1Pa - f2b[y] D[a4l1Pd, y]) > \varphi_0^{(0,4)}[T, X]$$

**It is interesting to see how the first terms combine. Actually we find :**

```
In[220]:= Simplify[-D[ $\frac{U'[y] (3 \mu U[y]^2 + 2 U'[y]^2)}{2 (\mu U[y]^2 + U'[y]^2)^{3/2}}$ , {y, 2}] - a4g1Pa + a4o1c + a4o1bP]
```

```
Out[220]:= 0
```

This means that  $< a4o1c + a4o1bP > = < a4g1Pa >$

and hence that the nonlinear terms are of the form  $\text{Constant} \times (\partial_x \varphi_0)^2$  , ,

The full amplitude equation is then (after 2 integrations in y)

$$\partial_T \varphi_0 + P \partial_X \varphi_0 + \epsilon \left( Q (\partial_X \varphi_0)^2 - \nu_T \partial_{X^2} \varphi_0 \right) = 0$$

$$\text{where } P = < \frac{\mu U[y] f1'[y] U'[y]}{\sqrt{\mu U[y]^2 + U'[y]^2}} >, \quad Q = < a4g1Pa > ,$$

$$\nu_T = - < -f1[y] U[y] - D f1'[y] U'[y] + (a4l1Pa - f2b[y] D[a4l1Pd, y]) >$$

## Dump / Recover



## Tools
