# Supplementary material for: Large-scale instability of a generalized turbulent Kolmogorov flow
Source: Copernicus journal article supplement (doi:10.5194/npg-16-569-2009), 2009-08-31
Supplement: Supplementary file 5 [file npg-16-569-2009-supplement.zip]

# Large-scale linear instability of the generalized Kolmogorov flow with modified viscosity

Bernard Legras  
 Laboratoire de Meteorologie Dynamique  
 Ecole Normale Supérieure  
 24 rue Lhomond  
 F-75231 PARIS Cedex 05  
 E-mail: legras@lmd.ens.fr  
 Barbara Villone  
 Istituto di Fisica dello Spazio Interplanetario  
 Corso Fiume, 4  
 I-10137 TORINO  
 E-mail: villone@to.infn.it

Smagorinsky-Clark mixed model + friction

$U = A \sin[y]$  and  $\mu = 1$

Streamfunction defined as  $u = \partial_y \psi$ ,  $v = -\partial_x \psi$

---

## Settings

### ■ Last use

```
DateList[]

{2009, 1, 14, 18, 21, 49.648320}
```

### ■ General

```
Off[General::spell1]
```

### ■ Laplacian

```
 $\Delta = - \left( \epsilon^2 \partial_{x,x} \# + \partial_{y,y} \# \right) \&$ 

 $- \left( \epsilon^2 \partial_{x,x} \#1 + \partial_{y,y} \#1 \right) \&$ 
```

## ■ Definition of the turbulent viscosity, Smagorinsky-Clark mixed model

Standard version

$$\bar{S} = \sqrt{4 (\epsilon \partial_{x,y} \#)^2 + (\epsilon^2 \partial_{x,x} \# - \partial_{y,y} \#)^2 + (\epsilon \partial_x \#)^2 + (\partial_y \#)^2} \quad \&$$

$$\sqrt{4 (\epsilon \partial_{x,y} \#1)^2 + (\epsilon^2 \partial_{x,x} \#1 - \partial_{y,y} \#1)^2 + (\epsilon \partial_x \#1)^2 + (\partial_y \#1)^2} \quad \&$$

Dissipation: C in front of the Smagorinsky component, D in front of the Clark component

In standard notations  $C = \Gamma^2/12$  and  $D = C_s \Gamma^2$

Note that  $K = -DS$  in the paper

$$DS =$$

$$C (\partial_{y,y} (\bar{S} [\#] (-\partial_{y,y} \# + \epsilon^2 \partial_{x,x} \#)) - \epsilon^2 \partial_{x,x} (\bar{S} [\#] (-\partial_{y,y} \# + \epsilon^2 \partial_{x,x} \#)) -$$

$$4 \epsilon^2 \partial_{x,y} (\bar{S} [\#] \partial_{x,y} \#)) +$$

$$D (\epsilon \partial_{x,y} \# (\epsilon^4 \partial_{x,x,x,x} \# - \partial_{y,y,y,y} \#) +$$

$$(\epsilon \partial_{x,y,y,y} \# + \epsilon^3 \partial_{x,x,x,y} \#) (\partial_{y,y} \# - \epsilon^2 \partial_{x,x} \#)) \quad \&$$

$$C (\partial_{y,y} (\bar{S} [\#1] (-\partial_{y,y} \#1 + \epsilon^2 \partial_{x,x} \#1)) - \epsilon^2 \partial_{x,x} (\bar{S} [\#1] (-\partial_{y,y} \#1 + \epsilon^2 \partial_{x,x} \#1)) -$$

$$4 \epsilon^2 \partial_{x,y} (\bar{S} [\#1] \partial_{x,y} \#1)) + D (\epsilon \partial_{x,y} \#1 (\epsilon^4 \partial_{x,x,x,x} \#1 - \partial_{y,y,y,y} \#1) +$$

$$(\epsilon \partial_{x,y,y,y} \#1 + \epsilon^3 \partial_{x,x,x,y} \#1) (\partial_{y,y} \#1 - \epsilon^2 \partial_{x,x} \#1)) \quad \&$$

## Definition of the modified Kolmogorov Flow

### ■ Velocity and streamfunction

$$U[y_] := A \sin[y]$$

$$\Phi[y_] := \text{Integrate}[U[s], \{s, 0, y\}]$$

### ■ Plots of the flow

$$\text{Plot}[U[y] /. \{A \rightarrow 1\}, \{y, -2\pi, 2\pi\}];$$

## ■ Forcing (or dissipation)

```
Forcing = Simplify[Assuming[A > 0 , Simplify[ DS[  $\Phi$ [y]]]]]

 $A^2 C \cos[y]$ 
```

## Definition of the perturbation problem

### ■ 2D Navier-Stokes with scaling

We have taken  $u = \partial_y \psi$  and  $v = -\partial_x \psi$  (mechanical definition)

```
NS =  $\epsilon^2 \partial_T \Delta[\psi[T, X, Y]] - \epsilon \partial_X \psi[T, X, Y] \partial_Y \Delta[\psi[T, X, Y]] +$   

 $\epsilon \partial_Y \psi[T, X, Y] \partial_X \Delta[\psi[T, X, Y]] - DS[\psi[T, X, Y]] + DS[\Phi[Y]];$ 
```

### ■ Expansion

```
 $\psi[T_, X_, Y_] := \Phi[Y] + \psi_0[T, X, Y] +$   

 $\epsilon \psi_1[T, X, Y] + \epsilon^2 \psi_2[T, X, Y] + \epsilon^3 \psi_3[T, X, Y] + \epsilon^4 \psi_4[T, X, Y]$ 
```

```
NS2 = Collect[Normal[Series[NS, { $\epsilon$ , 0, 4}]],  $\epsilon$ ];
```

## Order 0

```
a0 = Coefficient[NS2,  $\epsilon$ , 0];
```

### ■ Symbolic solution

```
Rule0 =  $\psi_0 \rightarrow (\varphi_0[\#1, \#2] \&)$ 
```

```
 $\psi_0 \rightarrow (\varphi_0[\#1, \#2] \&)$ 
```

### ■ Solvability condition

```
Assuming[{A > 0 }, FullSimplify[a0 /. {Rule0}]]
```

```
0
```

## Solvability condition

```
Solva[expr_] :=
  Simplify[(expr /. y -> 2 π) - (expr /. y -> 0)] /. g___[2 π] -> g[0]]
```

## Useful rules for simplifications

```
Rulea = (A^2 Sin[y]^2 + A^2 Cos[y]^2)^n -> A^2n
```

```
(A^2 Cos[y]^2 + A^2 Sin[y]^2)^n -> A^2n
```

```
Improve = Simplify[Together[#1], A > 0, Trig -> True] &
```

```
Simplify[Together[#1], A > 0, Trig -> True] &
```

```
Treat[expr_] :=
  Simplify[Simplify[expr /. μ -> 1, Trig -> True] /. θ -> (# &)]
```

## Order 1

```
a1 =
  Assuming[A > 0, Simplify[Expand[Coefficient[NS2, ε, 1]] /. Rule0]]

- 1/2 A (2 Sin[y] φ0^(0,1)[T, X] + C (4 Sin[2 y] ψ1^(0,0,1)[T, X, y] +
      3 Sin[2 y] ψ1^(0,0,3)[T, X, y] - (3 + Cos[2 y]) ψ1^(0,0,4)[T, X, y]))
```

### ■ Extraction of the linear operator and verification

```
a1F1 = FullSimplify[Coefficient[a1, ψ1^(0,0,1)[T, X, y], Trig -> True]

-2 A C Sin[2 y]
```

```
a1F2 = FullSimplify[Coefficient[a1,  $\psi_1^{(0,0,2)}[T, x, y]$ ], Trig → True]
```

```
0
```

```
a1F3 = Factor[Simplify[Coefficient[a1,  $\psi_1^{(0,0,3)}[T, x, y]$ ]]]
```

```
- 3 A C Cos[y] Sin[y]
```

```
a1F4 = Factor[Simplify[Coefficient[a1,  $\psi_1^{(0,0,4)}[T, x, y]$ ]]]
```

```
 $\frac{1}{2}$  A C (3 + Cos[2 y])
```

```
 $\mathcal{L}[f_] := \frac{1}{2} A C (\partial_{y,y} ((3 + \cos[2 y]) \partial_{y,y} f) + \partial_{y,y} (\sin[2 y] \partial_y f))$ 
```

```
Simplify[ $\mathcal{L}[f[y]] - a1F1 f^{(1)}[y] -$   

 $a1F2 f^{(2)}[y] - a1F3 f^{(3)}[y] - a1F4 f^{(4)}[y]$ , Trig -> True]
```

```
0
```

As a reference : complete operator for the full problem

$$\mathcal{L}[f_] := A C \partial_{y,y} \left( \frac{(\mu \sin[\theta[y]]^2 + 2 \cos[\theta[y]]^2 \theta'[y]^2)}{\sqrt{\mu \sin[\theta[y]]^2 + \cos[\theta[y]]^2 \theta'[y]^2}} \partial_{y,y} f \right) +$$

$$A C \mu \partial_{y,y} \left( \frac{\sin[2 \theta[y]] \theta'[y]}{2 \sqrt{\mu \sin[\theta[y]]^2 + \cos[\theta[y]]^2 \theta'[y]^2}} \partial_y f \right)$$

Operator to solve problem after two integrations

```
 $\mathcal{L2}[f_] := \frac{1}{2} A C ((3 + \cos[2 y]) \partial_{y,y} f + \sin[2 y] \partial_y f)$ 
```

```
 $\mathcal{L22}[h_] := \frac{1}{2} A C ((3 + \cos[2 y]) \partial_y h + \sin[2 y] h)$ 
```

## ■ Extraction of second member

```
a1a = -Simplify[Coefficient[a1,  $\varphi_0^{(0,1)}$ [T, X]]]
A Sin[y]
```

## ■ Reconstruction of the first order equation

```
a1N =  $\mathcal{L}[\psi_1[T, X, y]] - a1a \varphi_0^{(0,1)}[T, X];$ 
```

```
Simplify[a1N - a1]
0
```

## ■ Solvability condition

The solvability condition is obviously satisfied

## ■ Symbolic solution

```
Rule1 =  $\psi_1 \rightarrow (f1[\#3] \varphi_0^{(0,1)}[\#1, \#2] \&)$ 
 $\psi_1 \rightarrow (f1[\#3] \varphi_0^{(0,1)}[\#1, \#2] \&)$ 
```

f1 has SinI symmetry

## ■ Solution of the problem

```
solf1 = f1  $\rightarrow \left( \frac{1}{C} \text{Sin}[\#] \& \right)$ 
f1  $\rightarrow \left( \frac{\text{Sin}[\#1]}{C} \& \right)$ 
```

```
Simplify[ $\mathcal{L}[f1[y]] - a1a /. solf1$ ]
0
```

## Order 2

```
a2 = Assuming[A > 0 ,
  Simplify[Coefficient[NS2, ε, 2] /. {Rule0, Rule1} , Trig → True] ]
```

### ■ Extraction of second member and solvability

- term in factor of  $\varphi_0^{(0,1)}[T, x]^2 : a2a$

```
a2a = Collect[-Simplify[Coefficient[a2, φ0^(0,1)[T, x], 2] , {A, D, C}]

-f1^(3)[y] + 1/8 C ( 4 Cos[y] + 3 (Cos[y] + 3 Cos[3 y]) f1'[y]^2 +
  (-9 Cos[y] + Cos[3 y]) f1''[y]^2 + 2 (-9 Cos[y] + Cos[3 y]) f1^(3)[y]^2 +
  2 f1''[y] (12 Sin[y]^3 f1^(3)[y] + (-9 Cos[y] + Cos[3 y]) f1^(4)[y]) +
  2 f1'[y] (12 Sin[y]^3 f1''[y] +
    (-9 Cos[y] + 5 Cos[3 y]) f1^(3)[y] - 4 Sin[y]^3 f1^(4)[y]) )
```

```
a2aF = FullSimplify[a2a /. solf1]
```

$$\frac{(3 + C^2) \cos[y]}{2 C}$$

Solution of the perturbation problem

(- sign because the problem is already integrated twice)

```
ss2a = Flatten[DSolve[
  {L2[f2a[y]] == -a2aF, f2a[π/2] == 0, f2a'[0] == 0}, f2a[y], y]];
solf2a = f2a → Function[y, Evaluate[f2a[y] /. ss2a]]

f2a → Function[y, (3 + C^2) Cos[y] / (4 A C^2)]
```

■ term in factor of  $\varphi_0^{(0,2)}[T, X] : a2b$

```
a2b = -Collect[Simplify[Coefficient[a2 ,  $\varphi_0^{(0,2)}[T, X], 1]$ ], {A, D, C}]
-A (2 C Cos[2 y] - f1[y] Sin[y] -
Sin[y] f1''[y] + D (-Cos[y] f1'[y] - Cos[y] f1(3)[y]))
```

```
a2bF = a2b /. solf1
a2bFI2 = Integrate[Integrate[a2bF, y], y]
-2 A C Cos[2 y]
```

```
 $\frac{1}{2}$  A C Cos[2 y]
```

Solving for  $h2b = f2b'$  introducing an integration constant  $K2b$

```
ss2b = Flatten[DSolve[{ $\mathcal{L}22[h2b[y]] == a2bFI2 + K2b[y]$ ,
K2b'[y] == 0, h2b[0] == 0, h2b[ $\pi$ ] == 0}, {h2b[y], K2b[y]}, y]]
```

```
{h2b[y] →  $\frac{1}{4 \text{EllipticE}[\frac{1}{2}]}$ 
(2  $\sqrt{3 + \text{Cos}[2 y]}$  EllipticE[ $\frac{1}{2}$ ] EllipticF[y,  $\frac{1}{2}$ ] - 2  $\sqrt{3 + \text{Cos}[2 y]}$ 
EllipticE[y,  $\frac{1}{2}$ ] EllipticK[ $\frac{1}{2}$ ] + EllipticK[ $\frac{1}{2}$ ] Sin[2 y]),
K2b[y] →  $\frac{3 A C \text{EllipticE}[\frac{1}{2}] - 2 A C \text{EllipticK}[\frac{1}{2}]}{2 \text{EllipticE}[\frac{1}{2}]}$ }
```



```
p21 = Plot[h2b[y] /. ss2b, {y, 0, 2 π}, DisplayFunction → Identity];
p22 = Plot[h2b[y] / Sin[2 y] /. ss2b,
  {y, 0, 2 π}, DisplayFunction → Identity];
Show[GraphicsArray[{p21, p22}]]
```

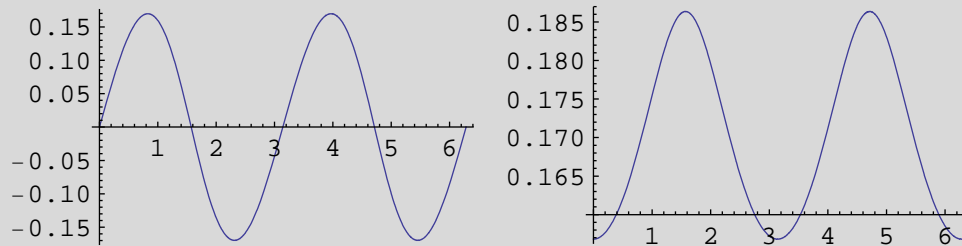

## ■ Reconstruction and check of the second order equation

```
a2N =  $\mathcal{L}[\psi_2[T, X, Y]] - a2b \varphi_0^{(0,2)}[T, X] - a2a \varphi_0^{(0,1)}[T, X]^2;$ 
```

```
Simplify[a2N - a2]
```

```
0
```

## ■ Symbolic solution

```
Rule2 =  $\psi_2 \rightarrow \left( f2a[\#3] \varphi_0^{(0,1)}[\#1, \#2]^2 + f2b[\#3] \varphi_0^{(0,2)}[\#1, \#2] \& \right)$ 
```

```
 $\psi_2 \rightarrow \left( f2a[\#3] \varphi_0^{(0,1)}[\#1, \#2]^2 + f2b[\#3] \varphi_0^{(0,2)}[\#1, \#2] \& \right)$ 
```

f2a has CosI symmetry

f2b has CosP symmetry

f2c has SinI symmetry

```
solf2 = Flatten[{solf2a}]
```

```
{f2a → Function[y,  $\frac{(3 + C^2) \text{Cos}[y]}{4 A C^2}$ ] }
```

## Order 3

```
a3 = Coefficient[NS2, ε, 3] /. {Rule0, Rule1, Rule2};
```

### ■ Extraction of second member and solvability

```
a31 = Collect[Expand[a3],
  {φ0(1,1)[T, X], φ0(0,1)[T, X], φ0(0,2)[T, X], φ0(0,3)[T, X]}];
```

### ■ Term in $\varphi_0^{(0,1)}[T, X]^3$ : a3a

```
a3a = Collect[Coefficient[-a31, φ0(0,1)[T, X]3], {C, A}];
a3aF = Assuming[A > 0, Simplify[a3a /. Flatten[{solf1, solf2}]]]
```

$$-\frac{(1 + C^2) \sin[y]}{2 A C^2}$$

```
ss3a = Flatten[DSolve[
  {ℒ2[f3a[y]] == -a3aF, f3a'[y] == 0, f3a[0] == 0}, f3a[y], y]];
solf3a = f3a → Function[y, Evaluate[f3a[y] /. ss3a]]

f3a → Function[y, -\frac{(1 + C^2) \sin[y]}{2 A^2 C^3}]
```

### ■ Terms in factor of $\varphi_0^{(0,1)}[T, X]$

```
a33 = Coefficient[Expand[a31], φ0(0,1)[T, X]];
```

### ■ Term in $\varphi_0^{(0,1)}[T, X] \varphi_0^{(0,2)}[T, X]$ : a3b

```
a3b = Assuming[A > 0,
  Collect[Coefficient[-a33, φ0(0,2)[T, X]], {D, C, A}]];
```

Solvability is satisfied since all contributions can be integrated twice

```
a3bF = Assuming[A > 0, Simplify[a3b /. solf1 /. solf2]]
a3bI2 = - $\frac{1}{2}$  (2 Cos[2 y] f2b'[y] + Sin[2 y] (3 - 2 f2b''[y])) - f2b'[y];
Simplify[D[a3bI2, {y, 2}] - a3bF]

4 Cos[2 y] f2b'[y] + (-1 + 3 Cos[2 y]) f2b(3)[y] + Sin[2 y] (6 + f2b(4)[y])
```

```
0
```

■ Term in  $\varphi 0^{(0,3)}[T, X]$  : a3d

```
a3d = Collect[Coefficient[-a31,  $\varphi 0^{(0,3)}[T, X]$ ], {D, A, C}];
```

```
a3dF = Assuming[A > 0, Simplify[a3d /. solf1 /. solf2]]

 $\frac{1}{4} A (11 \sin[y] + 4 f2b[y] \sin[y] - 9 \sin[3 y] +$   

 $4 D \cos[y] f2b'[y] + 4 \sin[y] f2b''[y] + 4 D \cos[y] f2b^{(3)}[y])$ 
```

Check the first integral

```
a3dI = - $\frac{11}{4} A \cos[y] + \frac{3}{4} A \cos[3 y] - A \cos[y] f2b[y] +$   

 $A \sin[y] f2b'[y] + A D (\sin[y] f2b'[y] + \cos[y] f2b''[y]);$ 
Simplify[D[a3dI, y] - a3dF]

0
```

■ Term in  $\varphi 0^{(1,1)}[T, X]$  : a3g

```
a3g = Coefficient[-a31,  $\varphi 0^{(1,1)}[T, X]$ ]

f1''[y]
```

```
a3gF = a3g /. solf1
```

```
 $-\frac{\sin[y]}{C}$ 
```

```
ss3g = Flatten[DSolve[
  {L2[f3g[y]] == -a3gF, f3g'[y] == 0, f3g[0] == 0}, f3g[y], y]];
solf3g = f3g → Function[y, Evaluate[f3g[y] /. ss3g]]

f3g → Function[y, - $\frac{\sin[y]}{A C^2}$ ]
```

### ■ Verification

```
a3N = -a3g  $\varphi_0^{(1,1)}$ [T, X] - a3d  $\varphi_0^{(0,3)}$ [T, X] -
  a3b  $\varphi_0^{(0,1)}$ [T, X]  $\varphi_0^{(0,2)}$ [T, X] - a3a  $\varphi_0^{(0,1)}$ [T, X]^3 + L[ψ3[T, X, y]];
Assuming[A > 0, Simplify[Together[Expand[a3N - a3]]]]

0
```

### ■ Solution

```
Rule3 = ψ3 → (f3g[#3]  $\varphi_0^{(1,1)}$ [T, X] + f3d[#3]  $\varphi_0^{(0,3)}$ [T, X] +
  f3b[#3]  $\varphi_0^{(0,1)}$ [T, X]  $\varphi_0^{(0,2)}$ [T, X] + f3a[#3]  $\varphi_0^{(0,1)}$ [T, X]^3 &);
```

f3a has SinI symmetry

f3b has SinP symmetry

f3c has CosI symmetry

f3d has SinI symmetry

f3e has CosP symmetry

f3f has SinI symmetry

f3g has SinI symmetry

f3h has SinI symmetry

```
solf3 = Flatten[{solf3a, solf3g}]

{f3a → Function[y, - $\frac{(1 + C^2) \sin[y]}{2 A^2 C^3}$ ], f3g → Function[y, - $\frac{\sin[y]}{A C^2}$ ]}
```

## Order 4

```
a4 = Assuming[A > 0 ,
  Coefficient[NS2, ε, 4] /. {Rule0, Rule1, Rule2, Rule3} ];
a41 = Collect[Expand[a4], {φ0(1,1)[T, X], φ0(1,2)[T, X],
  φ0(0,1)[T, X], φ0(0,2)[T, X], φ0(0,3)[T, X], , φ0(0,4)[T, X]}];
```

- Term in  $\varphi_0^{(0,1)}[T, X]^4$  : a4a

```
a4a = Collect[Coefficient[-a41, φ0(0,1)[T, X]4], {A, D, C}];
Assuming[A > 0, Simplify[a4a /. solf1 /. solf2 /. solf3]]
```

$$-\frac{(9 + 14 C^2 + C^4) \cos[y]}{16 A^2 C^3}$$

Solvability is satisfied for this term

- Terms in  $\varphi_0^{(0,1)}[T, X]^2$

```
a42 = Coefficient[a41, φ0(0,1)[T, X]2];
```

- Term in  $\varphi_0^{(0,1)}[T, X]^2 \varphi_0^{(0,2)}[T, X]$  : a4c

```
a4c = Collect[Coefficient[-a42, φ0(0,2)[T, X]] /. Rulea, {D, A, C}];
a4cF = Assuming[A > 0, Simplify[a4c /. solf1 /. solf2 /. solf3]]
a4cFFinal = + \frac{1}{2 A C} (19 + 5 C^2) \cos[2 y] - \frac{3 + C^2}{8 A C}
  ((12 f2b'[y] + 9 f2b^{(3)}[y]) \sin[2 y] - (1 + 3 \cos[2 y]) f2b^{(4)}[y]) +
  4 \cos[2 y] f3b'[y] - (1 - 3 \cos[2 y]) f3b^{(3)}[y] + \sin[2 y] f3b^{(4)}[y];
Simplify[a4cF - a4cFFinal /. {solf2a, solf1}]
```

$$\frac{1}{8 A C} (76 \cos[2 y] + 20 C^2 \cos[2 y] - 12 (3 + C^2) \sin[2 y] f2b'[y] +$$

$$32 A C \cos[2 y] f3b'[y] - 27 \sin[2 y] f2b^{(3)}[y] - 9 C^2 \sin[2 y] f2b^{(3)}[y] -$$

$$8 A C f3b^{(3)}[y] + 24 A C \cos[2 y] f3b^{(3)}[y] + 3 f2b^{(4)}[y] + C^2 f2b^{(4)}[y] +$$

$$9 \cos[2 y] f2b^{(4)}[y] + 3 C^2 \cos[2 y] f2b^{(4)}[y] + 8 A C \sin[2 y] f3b^{(4)}[y])$$

0

Check that the contribution can be integrated twice

```

a4cI2 = -  $\frac{1}{8 A C} (19 + 5 C^2) \cos[2 y] -$ 
           $2 \cos[y] (\cos[y] f3b'[y] - \sin[y] f3b''[y]) +$ 
           $\frac{3 + C^2}{8 A C} (3 \sin[2 y] f2b'[y] + (3 \cos[2 y] + 1) f2b''[y]);$ 
Simplify[D[a4cI2, {y, 2}] - a4c /. {solf2a, solf1}]
0

```

No contribution from this part

Hence, there is no term like  $\varphi_0^{(0,1)}[T, X]^2 \varphi_0^{(0,2)}[T, X]$  in the amplitude equation. Finding this term in previous versions of this calculation was a spurious consequence of the singularities induced by vanishing viscosity at the center of the jet.

■ Terms in  $\varphi_0^{(0,1)}[T, X]$

```

a43 = Coefficient[a41,  $\varphi_0^{(0,1)}[T, X]$ ];

```

■ Term in  $\varphi_0^{(0,1)}[T, X] \varphi_0^{(0,3)}[T, X] : a4g$

```

a4g = Collect[Coefficient[-a43,  $\varphi_0^{(0,3)}[T, X]$ ] /. Rulea, {A, D, C}];
a4gF = Simplify[a4g /. solf1 /. solf2 /. solf3]

```

```

 $\frac{1}{8 C} (15 \cos[y] + 9 C^2 \cos[y] -$ 
 $63 \cos[3 y] - 9 C^2 \cos[3 y] + 8 (1 + C^2) \cos[y] f2b[y] +$ 
 $8 (2 C^2 - D) \sin[y] f2b'[y] + 32 C \cos[2 y] f3d'[y] +$ 
 $8 \cos[y] f2b''[y] - 8 C^2 \cos[y] f2b''[y] - 8 D \sin[y] f2b^{(3)}[y] -$ 
 $8 C f3d^{(3)}[y] + 24 C \cos[2 y] f3d^{(3)}[y] + 8 C \sin[2 y] f3d^{(4)}[y])$ 

```

```

a4gI2 = +  $\frac{1}{8C}$   $(-15 \cos[y] - 9 C^2 \cos[y] + 7 \cos[3y] + C^2 \cos[3y]) -$ 
 $(1 + \cos[2y]) f3d'[y] + \sin[2y] f3d''[y] - C \cos[y] f2b[y];$ 
a4gI1 = -  $\frac{D}{C}$   $(-\cos[y] f2b'[y] + \sin[y] f2b''[y]) +$ 
 $\frac{1}{C}$   $(f2b[y] \sin[y] + \cos[y] f2b'[y]);$ 
Simplify[a4gF - D[a4gI2, {y, 2}] - D[a4gI1, y]]

0

```

■ Term in  $\varphi_0^{(0,1)}[T, X] \varphi_0^{(1,1)}[T, X] : a4h$

```

a4h = Collect[Coefficient[-a43,  $\varphi_0^{(1,1)}[T, X]$ ] /. Rulea, {A, D, C}];
Simplify[a4h /. solf1 /. solf2 /. solf3]


$$-\frac{(7 + C^2) \cos[y]}{2 A C^2}$$


```

■ Term in  $\varphi_0^{(0,4)}[T, X] : a4l$

```

a4l = Collect[Coefficient[-a41,  $\varphi_0^{(0,4)}[T, X]$ ] /. Rulea, {A, D, C}];
a4lF = Simplify[a4l /. solf1 /. solf2 /. solf3]


$$\frac{1}{C} A \left( D \cos[y]^2 + \sin[y]^2 - \frac{1}{2} C^2 (3 + \cos[2y] + 4 \cos[2y] f2b[y] + \right.$$


$$\left. 3 \sin[2y] f2b'[y] + 2 f2b''[y] - 2 \cos[2y] f2b''[y]) \right)$$


```

Eliminate the terms that can be integrated and keep only the contributing terms

```

Expand[Simplify[Expand[a4lF + D[ $\frac{AC}{4} \sin[2y] + AC f2b'[y], y]$ ]]]]


$$-\frac{3AC}{2} + \frac{AD \cos[y]^2}{C} - 2AC \cos[2y] f2b[y] +$$


$$\frac{A \sin[y]^2}{C} - 3AC \cos[y] \sin[y] f2b'[y] + AC \cos[2y] f2b''[y]$$


```

■ Term in  $\varphi_1^{(1,1)}[T, X] : a_{4m}$

```
a4m = Coefficient[-a41,  $\varphi_1^{(1,1)}[T, X]$ ]
```

```
0
```

```
a4m /. solf2
```

```
0
```

■ Term in  $\varphi_0^{(1,2)}[T, X] : a_{4n}$

```
a4n = Collect[Coefficient[-a41,  $\varphi_0^{(1,2)}[T, X]$ ], {A, D}]
```

```
1 + f2b''[Y]
```

The first term contributes, the second one does not

■ Term in  $\varphi_0^{(0,2)}[T, X]^2 : a_{4o}$

```
a4o = Collect[Coefficient[-a41,  $\varphi_0^{(0,2)}[T, X]^2$ ] /. Rulea, {A, D, C}];  
a4oF = Simplify[a4o /. solf1 /. solf2 /. solf3]
```

$$\frac{1}{8C} \left( 3C^2 (\cos[Y] + 3\cos[3Y]) f2b'[Y]^2 + \right. \\ C^2 (-9\cos[Y] + \cos[3Y]) f2b''[Y]^2 + 4f2b''[Y] (6C^2 \sin[Y]^3 f2b^{(3)}[Y] + \\ \cos[Y] (-3C^2 - 2D + 3C^2 \cos[2Y] + C^2 (-5 + \cos[2Y]) f2b^{(4)}[Y])) + \\ 2 \left( 2(-2 - 5C^2 + 5C^2 \cos[2Y]) \sin[Y] f2b^{(3)}[Y] + \right. \\ C^2 (-9\cos[Y] + \cos[3Y]) f2b^{(3)}[Y]^2 - 2\cos[Y] \\ \left. (-6 - 9C^2 - 2D + 9C^2 \cos[2Y] + (-5C^2 + 2D + C^2 \cos[2Y]) f2b^{(4)}[Y]) \right) + \\ 2f2b'[Y] (12C^2 \sin[Y]^3 f2b''[Y] + C^2 (-9\cos[Y] + 5\cos[3Y]) f2b^{(3)}[Y] + \\ \left. 2\sin[Y] (-2 + 3C^2 + 9C^2 \cos[2Y] - 2C^2 \sin[Y]^2 f2b^{(4)}[Y]) \right) \Big)$$

Primitive for the whole expression



```

a4oI =  $\frac{3 \sin[y]}{C} + \frac{9}{4} C \sin[y] - \frac{3}{4} C \sin[3 y] -$ 
 $\frac{1}{C} \left( -\cos[y] f2b'[y] + (1 + D) \sin[y] f2b''[y] + \right.$ 
 $D \left( -\sin[y] + \cos[y] f2b^{(3)}[y] \right) - \frac{1}{4} C \left( -6 \cos[y]^2 \sin[y] f2b'[y]^2 - \right.$ 
 $2 \sin[y]^3 f2b''[y]^2 + (-9 \cos[y] + \cos[3 y]) f2b^{(3)}[y] +$ 
 $f2b''[y] \left( 8 \sin[y]^3 - (-9 \cos[y] + \cos[3 y]) f2b^{(3)}[y] \right) -$ 
 $2 f2b'[y] \left( (-3 \cos[y] + \cos[3 y]) f2b''[y] - \right.$ 
 $\left. \left. 2 \sin[y]^2 (-3 \cos[y] + \sin[y] f2b^{(3)}[y]) \right) \right);$ 
Simplify[D[a4oI, y] - a4oF]

```

0

Better expression

```

a4oIFinal =
 $3 \sin[y] \left( \frac{1}{C} \left( 1 + \frac{D}{3} \right) + C \sin[y]^2 \right) - \frac{1}{C} \left( \sin[y] f2b''[y] - \cos[y] f2b'[y] \right) -$ 
 $\frac{D}{C} \left( \sin[y] f2b''[y] + \cos[y] f2b^{(3)}[y] \right) -$ 
 $\frac{1}{4} C D \left[ 2 \cos[y]^3 f2b'[y]^2 + 4 \sin[y]^3 f2b'[y] (-1 + f2b''[y]) - \right.$ 
 $\left. \frac{1}{2} (-9 \cos[y] + \cos[3 y]) (-2 + f2b''[y]) f2b''[y], y \right];$ 
Simplify[a4oIFinal - a4oI]

```

0

## ■ Verification

```

a4NN = -a4o  $\varphi_0^{(0,2)}[T, X]^2 - a4n \varphi_0^{(1,2)}[T, X] - a4l \varphi_0^{(0,4)}[T, X] -$ 
 $\varphi_0^{(0,1)}[T, X] \left( a4g \varphi_0^{(0,3)}[T, X] + a4h \varphi_0^{(1,1)}[T, X] \right) -$ 
 $a4c \varphi_0^{(0,1)}[T, X]^2 \varphi_0^{(0,2)}[T, X] - a4a \varphi_0^{(0,1)}[T, X]^4 + \mathcal{L}[\psi_4[T, X, y]];$ 
Simplify[a4NN - a4 /. Rulea /. solf1 /. solf2a]

```

0

## ■ Dump

```
DumpSave["CH-eff1-nu-9b_compact.m6.mx", "Global`"]
```

```
{Global`}
```

```
<< CH-eff1-nu-9b_compact.m6.mx
```

## Amplitude equation

### ■ Calculation of $-\frac{3}{2} \frac{1}{2\pi} \int_0^{2\pi} \partial_y f2b \sin 2y dy$

```
II = -\frac{3}{2} \frac{1}{2\pi} Integrate[Evaluate[Sin[2 y] h2b[y] /. ss2b], {y, 0, 2 \pi}]
N[II]
```

$$-\frac{3}{4} \left( 2 - \frac{4 \operatorname{EllipticK}\left[\frac{1}{2}\right]}{3 \operatorname{EllipticE}\left[\frac{1}{2}\right]} \right)$$

```
-0.127266
```

### ■ Stability threshold

$$DD = \frac{1}{144} + 4 Cs^2 (3 + 2 II) /. Cs \rightarrow 0.13$$

$$\sqrt{\frac{1}{2 (3 + 2 II) Cs^2} \left( \frac{1}{12} + \sqrt{DD} \right)} /. Cs \rightarrow 0.13$$

```
0.192538
```

```
2.37203
```
