# Supplementary material for: Large-scale instability of a generalized turbulent Kolmogorov flow
Source: Copernicus journal article supplement (doi:10.5194/npg-16-569-2009), 2009-08-31
Supplement: Supplementary file 6 [file npg-16-569-2009-supplement.zip]

# Large-scale linear instability of the generalized Kolmogorov flow - viscous version with a general parallel flow

Bernard Legras  
 Laboratoire de Meteorologie Dynamique  
 Ecole Normale Supérieure  
 24 rue Lhomond  
 F-75231 PARIS Cedex 05  
 E-mail: legras@lmd.ens.fr  
 Barbara Villone  
 Istituto di Fisica dello Spazio Interplanetario  
 Corso Fiume, 4  
 I-10137 TORINO  
 E-mail: villone@to.infn.it

$U$  of any shape,  
 periodic within the interval  $[0, 2\pi]$   
 with the condition that  $\int_0^{2\pi} U[y] dy = 0$   
 Streamfunction defined as  $u = \partial_y \psi$ ,  $v = -\partial_x \psi$

## Settings

### ■ Last use

```
DateList[]  
  
{2009, 1, 14, 16, 13, 15.805210}
```

## ■ General

```
Off[General::spell1]
```

## ■ Laplacian

```

$$\Delta = - \left( \epsilon^2 \partial_{x,x} \# + \partial_{y,y} \# \right) \&$$


$$- \left( \epsilon^2 \partial_{x,x} \#1 + \partial_{y,y} \#1 \right) \&$$

```

Beware of the sign in the definition

## ■ Definition of the dissipation

Standard viscosity

```
DS = - \nu \Delta[\#] \&
- \nu \Delta[\Delta[\#1]] \&
```

# Definition of the modified Kolmogorov Flow

## ■ Velocity and streamfunction

```
 $\Phi[y_] := \text{Integrate}\left[U[s], \left\{s, \frac{\pi}{2}, y\right\}\right]$ 
```

## ■ Exemples of flows

Standard Kolmogorov flow in Flow1

```
Flow2 = U → Evaluate[Sin[# +  $\frac{1}{2}$  Sin[2 #]] &];
Flow1 = U → Evaluate[Sin[#] &];
Flow3 = U → Evaluate[Sin[# +  $\frac{1}{4}$  Sin[2 #]] &];
```

## ■ Plots of the flow

```
{Plot[U[y] /. {Flow1, A → 1}, {y, -2 π, 2 π}],  
Plot[U[y] /. {Flow2, A → 1}, {y, -2 π, 2 π}],  
Plot[U[y] /. {Flow3, A → 1}, {y, -2 π, 2 π}]}
```

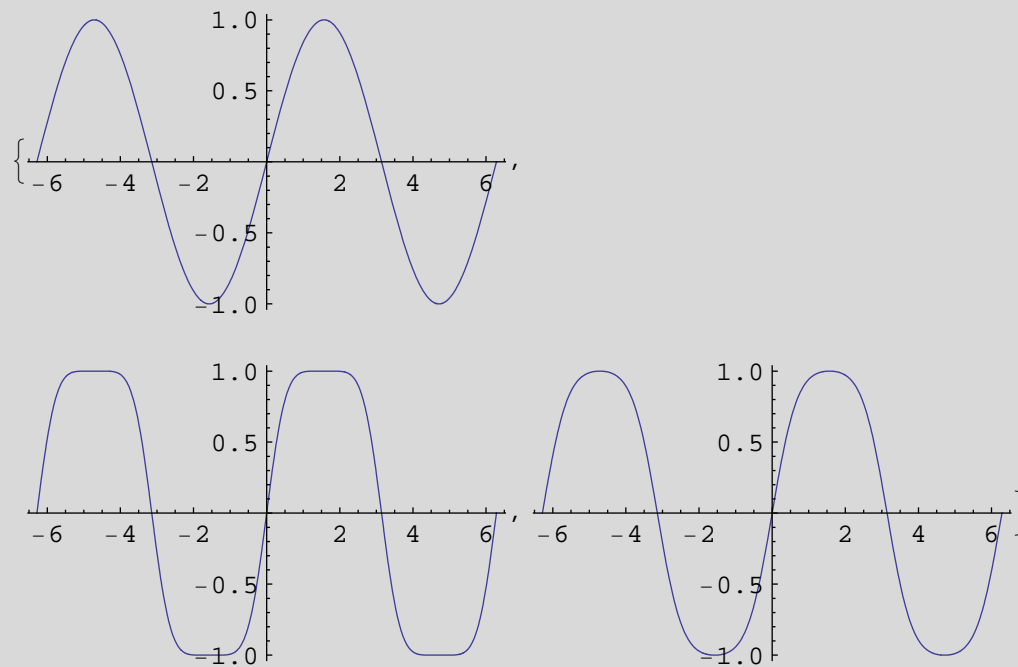

## ■ Plots of the streamfunction

```

 $\Phi 1 = \text{NIntegrate}[\text{Evaluate}[U[y] /. \{\text{Flow1}, A \rightarrow 1\}], \{y, \frac{\pi}{2}, \# \}] \&;$ 
 $\Phi 2 = \text{NIntegrate}[\text{Evaluate}[U[y] /. \{\text{Flow2}, A \rightarrow 1\}], \{y, \frac{\pi}{2}, \# \}] \&;$ 
 $\Phi 3 = \text{NIntegrate}[\text{Evaluate}[U[y] /. \{\text{Flow3}, A \rightarrow 1\}], \{y, \frac{\pi}{2}, \# \}] \&;$ 
{Plot[ $\Phi 1[u]$ , {u,  $-2\pi$ ,  $2\pi$ ]},
 Plot[ $\Phi 2[u]$ , {u,  $-2\pi$ ,  $2\pi$ ]},
 Plot[ $\Phi 3[u]$ , {u,  $-2\pi$ ,  $2\pi$ ]}]

```

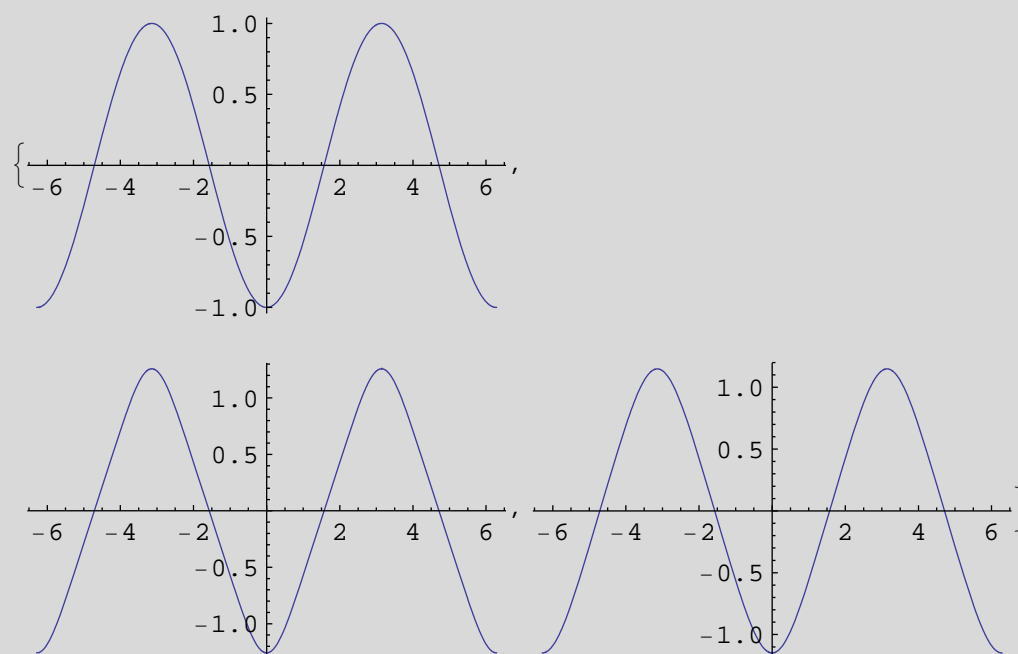

## ■ Plots of the forcing

```
Forcing = Simplify[DS[ $\Phi[y]$ ]]
```

$-\nu U^{(3)}[y]$

```
{Plot[ Forcing /. {Flow1, A → 1, ν → 1},
  {y, -2 π, 2 π}, PlotRange → All],
Plot[ Forcing /. {Flow2, A → 1, ν → 1},
  {y, -2 π, 2 π}, PlotRange → All],
Plot[ Forcing /. {Flow3, A → 1, ν → 1},
  {y, -2 π, 2 π}, PlotRange → All]}
```

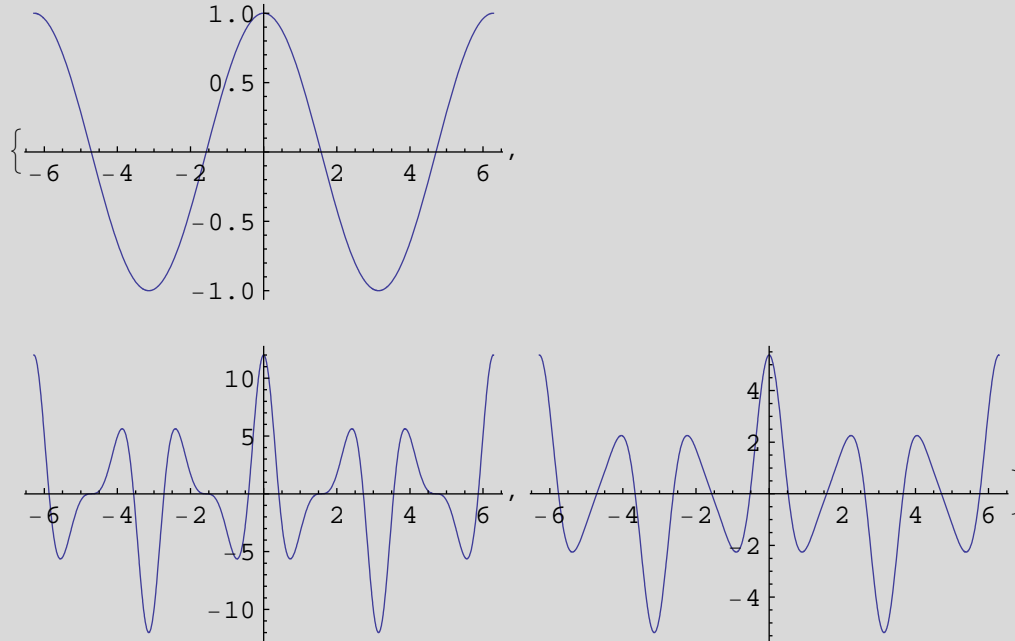

## Definition of the perturbation problem

### ■ 2D Navier-Stokes with scaling

We have taken  $u = \partial_y \psi$  and  $v = -\partial_x \psi$  (mechanical definition)  
a linear friction term has been included

$$\begin{aligned} \text{NS} = & \epsilon^2 \partial_T \Delta[\psi[T, X, Y]] - \epsilon \partial_X \psi[T, X, Y] \partial_Y \Delta[\psi[T, X, Y]] + \\ & \epsilon \partial_Y \psi[T, X, Y] \partial_X \Delta[\psi[T, X, Y]] + \epsilon^2 r \Delta[\psi[T, X, Y]] - \\ & \text{DS}[\psi[T, X, Y]] + \text{DS}[\Phi[Y]] - \epsilon^2 r \Delta[\Phi[Y]]; \end{aligned}$$

### ■ Expansion

$$\begin{aligned} \psi[T_, X_, Y_] := & \Phi[Y] + \psi_0[T, X, Y] + \\ & \epsilon \psi_1[T, X, Y] + \epsilon^2 \psi_2[T, X, Y] + \epsilon^3 \psi_3[T, X, Y] + \epsilon^4 \psi_4[T, X, Y] \end{aligned}$$

```
NS2 = Collect[Normal[Series[NS, {ϵ, 0, 4}]], ϵ];
```

---

## Order 0

```
a0 = Simplify[Coefficient[NS2, ϵ, 0] ]
```

```
 $\vee \psi^{(0,0,4)}_0 [T, X, Y]$ 
```

### ■ Symbolic solution

```
Rule0 =  $\psi_0 \rightarrow (\varphi_0[\#1, \#2] \ \&);$ 
```

### ■ Check solution

```
Simplify[a0 /. {Rule0}]
```

```
0
```

---

## Solvability condition

```
Solva[expr_, Rules___] :=  
  Integrate[expr /. Flatten[ {Rules}], {y, 0, 2 π}] /. g___[2 π] → g[0]
```

---

## Order 1

```
a1 = Simplify[Expand[Coefficient[NS2, ϵ, 1]] /. Rule0 ]
```

```
 $U''[Y] \varphi^{(0,1)}_0 [T, X] + \vee \psi^{(0,0,4)}_1 [T, X, Y]$ 
```

### ■ Define linear operator

```
 $\mathcal{L}[f_] := + \partial_{Y,Y} (\vee \partial_{Y,Y} f)$ 
```

## ■ Extraction and integration of second member

```
a1a = -Simplify[Coefficient[a1,  $\varphi_0^{(0,1)}$ [T, X]]]
```

```
-U''[Y]
```

```
a1aI2 = Integrate[Integrate[a1a, Y], Y]
```

```
-U[Y]
```

## ■ Reconstruction and check of the first order equation

```
a1N =  $\mathcal{L}[\psi_1[T, X, Y]] - a1a \varphi_0^{(0,1)}[T, X];$   
Simplify[a1N - a1]
```

```
0
```

## ■ Solvability condition

The solvability condition is obviously satisfied with this second member since it has a primitive (even two primitives)

```
Solva[a1a] /. g___[2  $\pi$ ]  $\rightarrow$  g[0]
```

```
0
```

## ■ Symbolic solution

```
Rule1 =  $\psi_1 \rightarrow (f1[\#3] \varphi_0^{(0,1)}[\#1, \#2] \&);$ 
```

---

## Order 2

```
a2 = Simplify[Coefficient[NS2,  $\epsilon$ , 2] /. {Rule0, Rule1}, Trig  $\rightarrow$  True]
```

```
 $f_1^{(3)}[Y] \varphi_0^{(0,1)}[T, X]^2 - U[Y] f_1''[Y] \varphi_0^{(0,2)}[T, X] +$   
 $f_1[Y] U''[Y] \varphi_0^{(0,2)}[T, X] + \psi_2^{(0,0,4)}[T, X, Y]$ 
```

## Extraction of second member and solvability

### ■ term in factor of $\varphi_0^{(0,1)}[T, X]^2$

```
a2a = -Factor[Simplify[Coefficient[a2 ,  $\varphi_0^{(0,1)}[T, X]$  , 2] ]]
```

```
Solva[a2a]
```

```
-f1(3)[Y]
```

```
0
```

### ■ term in factor of $\varphi_0^{(0,2)}[T, X]$

```
a2b = -Simplify[Coefficient[a2 ,  $\varphi_0^{(0,2)}[T, X]$  , 1] ]
```

```
Integrate[a2b, y]
```

```
Solva[a2b]
```

```
U[Y] f1''[Y] - f1[Y] U''[Y]
```

```
U[Y] f1'[Y] - f1[Y] U'[Y]
```

```
0
```

### ■ Reconstruction and check of the second order equation

```
a2N =  $\mathcal{L}[\psi_2[T, X, Y]]$  - a2b  $\varphi_0^{(0,2)}[T, X]$  - a2a  $\varphi_0^{(0,1)}[T, X]^2$ ;
```

```
Simplify[a2N - a2]
```

```
0
```

### ■ Symbolic solution

```
Rule2 =  $\psi_2 \rightarrow \left( f2a[\#3] \varphi_0^{(0,1)}[\#1, \#2]^2 + f2b[\#3] \varphi_0^{(0,2)}[\#1, \#2] \ \& \right);$ 
```



## Order 3

```
a3 = FullSimplify[
  Coefficient[NS2, e, 3]  //. {Rule0, Rule1, Rule2} , Trig → True]

f2a(3)[Y] ϕ0(0,1)[T, X]3 +
  (-2 U[Y] f2a''[Y] + 2 f2a[Y] U''[Y] + f1[Y] f1(3)[Y] + f2b(3)[Y]) ϕ0(0,1)[T, X]
  ϕ0(0,2)[T, X] - (U[Y] (1 + f2b''[Y]) - f2b[Y] U''[Y]) ϕ0(0,3)[T, X] - f1''[Y]
  (ϕ0(0,1)[T, X] (r + f1'[Y] ϕ0(0,2)[T, X]) - 2 √ ϕ0(0,3)[T, X] + ϕ0(1,1)[T, X]) +
  √ ψ3(0,0,4)[T, X, Y]
```

### ■ Extraction of second member and solvability

```
a31 = Collect[Expand[a3],
  {ϕ0(1,1)[T, X], ϕ0(0,1)[T, X], ϕ0(0,2)[T, X], ϕ0(0,3)[T, X]}]

f2a(3)[Y] ϕ0(0,1)[T, X]3 +
  ϕ0(0,1)[T, X] (-r f1''[Y] + (-f1'[Y] f1''[Y] - 2 U[Y] f2a''[Y] +
    2 f2a[Y] U''[Y] + f1[Y] f1(3)[Y] + f2b(3)[Y]) ϕ0(0,2)[T, X]) +
  (-U[Y] + 2 √ f1''[Y] - U[Y] f2b''[Y] + f2b[Y] U''[Y]) ϕ0(0,3)[T, X] -
  f1''[Y] ϕ0(1,1)[T, X] + √ ψ3(0,0,4)[T, X, Y]
```

### ■ Term in ϕ0<sup>(0,1)</sup>[T, X]<sup>3</sup> : a3a

```
a3a = -Coefficient[a31, ϕ0(0,1)[T, X]3]
Solve[a3a]

-f2a(3)[Y]
```

0

■ Term in  $\varphi_0^{(0,1)}[T, X] \varphi_0^{(0,2)}[T, X] : a3b$

```
a3b =
  -Coefficient[Coefficient[Expand[a31],  $\varphi_0^{(0,1)}[T, X], 1], \varphi_0^{(0,2)}[T, X]]
Integrate[a3b, y]
Solva[a3b]$ 
```

```
f1'[y] f1''[y] + 2 U[y] f2a''[y] - 2 f2a[y] U''[y] - f1[y] f1(3)[y] - f2b(3)[y]
```

```
f1'[y]2 + 2 U[y] f2a'[y] - 2 f2a[y] U'[y] - f1[y] f1''[y] - f2b''[y]
```

```
0
```

■ Term in  $\varphi_0^{(0,3)}[T, X] : a3d$

```
a3d = -Coefficient[a31,  $\varphi_0^{(0,3)}[T, X]$ ]
Integrate[a3d - U[y], y]
Solva[a3d - U[y]]
```

```
U[y] - 2 √ f1''[y] + U[y] f2b''[y] - f2b[y] U''[y]
```

```
-2 √ f1'[y] + U[y] f2b'[y] - f2b[y] U'[y]
```

```
0
```

The solvability condition is satisfied due to the hypothesis that  $\int_0^{2\pi} U[y] dy = 0$ ,  
no other contribution

■ Term in  $\varphi_0^{(1,1)}[T, X] : a3g$

```
a3g = -Coefficient[a31,  $\varphi_0^{(1,1)}[T, X]$ ]
Solva[a3g]
```

```
f1''[y]
```

```
0
```

### Terms due to friction

```
a3r = -Coefficient[a31, r  $\varphi_0^{(0,1)}$  [T, X]]
Solve[a3r]

f1''[Y]
```

```
0
```

### ■ Reconstruction and check of the third order equation

```
a3N =
  -a3g  $\varphi_0^{(1,1)}$  [T, X] - a3d  $\varphi_0^{(0,3)}$  [T, X] -  $\varphi_0^{(0,1)}$  [T, X] (a3b  $\varphi_0^{(0,2)}$  [T, X] ) -
  a3a  $\varphi_0^{(0,1)}$  [T, X]3 - r a3r  $\varphi_0^{(0,1)}$  [T, X] +  $\mathcal{L}[\psi_3[T, X, Y]]$ ;
Simplify[a3N - a3]

0
```

### ■ Symbolic solution

```
Rule3 =  $\psi_3 \rightarrow$  ( f3g[#3]  $\varphi_0^{(1,1)}$  [#1, #2] + f3d[#3]  $\varphi_0^{(0,3)}$  [#1, #2] +
   $\varphi_0^{(0,1)}$  [#1, #2] ( f3b[#3]  $\varphi_0^{(0,2)}$  [#1, #2] ) +
  f3a[#3]  $\varphi_0^{(0,1)}$  [#1, #2]3 + r f3r[#3]  $\varphi_0^{(0,1)}$  [#1, #2] & );
```

## Order 4

```

a4 = Simplify[Coefficient[NS2, e, 4] //.
{Rule0, Rule1, Rule2, Rule3} , Trig → True]

-r  $\varphi_0^{(0,2)}[T, X] -$ 
 $f_1''[Y] \varphi_0^{(0,2)}[T, X] \left( f_2 a'[Y] \varphi_0^{(0,1)}[T, X]^2 + f_2 b'[Y] \varphi_0^{(0,2)}[T, X] \right) -$ 
 $r \left( f_2 a''[Y] \varphi_0^{(0,1)}[T, X]^2 + f_2 b''[Y] \varphi_0^{(0,2)}[T, X] \right) +$ 
 $f_1[Y] \varphi_0^{(0,2)}[T, X] \left( f_2 a^{(3)}[Y] \varphi_0^{(0,1)}[T, X]^2 + f_2 b^{(3)}[Y] \varphi_0^{(0,2)}[T, X] \right) +$ 
 $f_1'[Y] \varphi_0^{(0,1)}[T, X] \varphi_0^{(0,3)}[T, X] + f_1^{(3)}[Y] \varphi_0^{(0,1)}[T, X]$ 
 $\left( 2 f_2 a[Y] \varphi_0^{(0,1)}[T, X] \varphi_0^{(0,2)}[T, X] + f_2 b[Y] \varphi_0^{(0,3)}[T, X] \right) - f_1'[Y] \varphi_0^{(0,1)}[$ 
 $T, X] \left( 2 f_2 a''[Y] \varphi_0^{(0,1)}[T, X] \varphi_0^{(0,2)}[T, X] + (1 + f_2 b''[Y]) \varphi_0^{(0,3)}[T, X] \right) +$ 
 $\vee \varphi_0^{(0,4)}[T, X] + 2 \vee \left( 2 f_2 a''[Y] \left( \varphi_0^{(0,2)}[T, X]^2 + \varphi_0^{(0,1)}[T, X] \varphi_0^{(0,3)}[T, X] \right) +$ 
 $f_2 b''[Y] \varphi_0^{(0,4)}[T, X] \right) - 2 f_2 a''[Y] \varphi_0^{(0,1)}[T, X] \varphi_0^{(1,1)}[T, X] +$ 
 $\varphi_0^{(0,1)}[T, X] \left( r f_3 r^{(3)}[Y] \varphi_0^{(0,1)}[T, X] + f_3 a^{(3)}[Y] \varphi_0^{(0,1)}[T, X]^3 +$ 
 $f_3 b^{(3)}[Y] \varphi_0^{(0,1)}[T, X] \varphi_0^{(0,2)}[T, X] + f_3 d^{(3)}[Y] \varphi_0^{(0,3)}[T, X] +$ 
 $f_3 g^{(3)}[Y] \varphi_0^{(1,1)}[T, X] \right) - \varphi_0^{(1,2)}[T, X] - f_2 b''[Y] \varphi_0^{(1,2)}[T, X] +$ 
 $U''[Y] \left( r f_3 r[Y] \varphi_0^{(0,2)}[T, X] + 3 f_3 a[Y] \varphi_0^{(0,1)}[T, X]^2 \varphi_0^{(0,2)}[T, X] +$ 
 $f_3 b[Y] \varphi_0^{(0,2)}[T, X]^2 + f_3 b[Y] \varphi_0^{(0,1)}[T, X] \varphi_0^{(0,3)}[T, X] +$ 
 $f_3 d[Y] \varphi_0^{(0,4)}[T, X] + f_3 g[Y] \varphi_0^{(1,2)}[T, X] \right) -$ 
 $U[Y] \left( r f_3 r''[Y] \varphi_0^{(0,2)}[T, X] + 3 f_3 a''[Y] \varphi_0^{(0,1)}[T, X]^2 \varphi_0^{(0,2)}[T, X] + f_3 b''[Y]$ 
 $\varphi_0^{(0,2)}[T, X]^2 + f_3 b''[Y] \varphi_0^{(0,1)}[T, X] \varphi_0^{(0,3)}[T, X] + f_1[Y] \varphi_0^{(0,4)}[T, X] +$ 
 $f_3 d''[Y] \varphi_0^{(0,4)}[T, X] + f_3 g''[Y] \varphi_0^{(1,2)}[T, X] \right) + \vee \psi_4^{(0,0,4)}[T, X, Y]$ 

```

■ Terms containing  $\varphi_0^{(0,1)}[T, X]$

■ Terms in  $\varphi_0^{(0,1)}[T, X]^4 : a4a$

```
a4a = -Coefficient[Expand[a4],  $\varphi_0^{(0,1)}[T, X]^4$ ]
Solve[a4a]

-f3a(3)[Y]
```

0

■ Terms in  $\varphi_0^{(0,1)}[T, X]^3$

```
Coefficient[Expand[a4],  $\varphi_0^{(0,1)}[T, X]^3$ ]
```

0

■ Terms in  $\varphi_0^{(0,1)}[T, X]^2$

```
a42 = Coefficient[Expand[a4],  $\varphi_0^{(0,1)}[T, X]^2$ ]

-r f2a''[Y] + r f3r(3)[Y] - f2a'[Y] f1''[Y]  $\varphi_0^{(0,2)}[T, X]$  -
  2 f1'[Y] f2a''[Y]  $\varphi_0^{(0,2)}[T, X]$  - 3 U[Y] f3a''[Y]  $\varphi_0^{(0,2)}[T, X]$  +
  3 f3a[Y] U''[Y]  $\varphi_0^{(0,2)}[T, X]$  + 2 f2a[Y] f1(3)[Y]  $\varphi_0^{(0,2)}[T, X]$  +
  f1[Y] f2a(3)[Y]  $\varphi_0^{(0,2)}[T, X]$  + f3b(3)[Y]  $\varphi_0^{(0,2)}[T, X]$ 
```

■ Terms in  $r \varphi_0^{(0,1)}[T, X]^2 : a4u$

```
a4u = -Coefficient[Expand[a42], r]
Solve[a4u]
```

f2a''[Y] - f3r<sup>(3)</sup>[Y]

0

■ Terms in  $\varphi_0^{(0,1)}[T, X]^2 \varphi_0^{(0,2)}[T, X] : a4c$

```
a4c = -Coefficient[Expand[a42],  $\varphi_0^{(0,2)}[T, X]$ ]
Integrate[a4c, y]
Solva[a4c]
```

$$f2a'[y] f1''[y] + 2 f1'[y] f2a''[y] + 3 U[y] f3a''[y] - \\ 3 f3a[y] U''[y] - 2 f2a[y] f1^{(3)}[y] - f1[y] f2a^{(3)}[y] - f3b^{(3)}[y]$$

$$3 f1'[y] f2a'[y] + 3 U[y] f3a'[y] - \\ 3 f3a[y] U'[y] - 2 f2a[y] f1''[y] - f1[y] f2a''[y] - f3b''[y]$$

$$0$$

■ Terms in  $\varphi_0^{(0,1)}[T, X]$

```
a43 = Coefficient[Expand[a4],  $\varphi_0^{(0,1)}[T, X]$ ]
```

$$4 \vee f2a''[y] \varphi_0^{(0,3)}[T, X] - f1'[y] f2b''[y] \varphi_0^{(0,3)}[T, X] - \\ U[y] f3b''[y] \varphi_0^{(0,3)}[T, X] + f3b[y] U''[y] \varphi_0^{(0,3)}[T, X] + \\ f2b[y] f1^{(3)}[y] \varphi_0^{(0,3)}[T, X] + f3d^{(3)}[y] \varphi_0^{(0,3)}[T, X] - \\ 2 f2a''[y] \varphi_0^{(1,1)}[T, X] + f3g^{(3)}[y] \varphi_0^{(1,1)}[T, X]$$

■ Term in  $\varphi_0^{(0,1)}[T, X] \varphi_0^{(0,3)}[T, X] : a4g$

```
a4g = -Coefficient[Expand[a43],  $\varphi_0^{(0,3)}[T, X]$ ]
Integrate[a4g, y]
Solva[a4g]
```

$$-4 \vee f2a''[y] + f1'[y] f2b''[y] + U[y] f3b''[y] - \\ f3b[y] U''[y] - f2b[y] f1^{(3)}[y] - f3d^{(3)}[y]$$

$$-4 \vee f2a'[y] + f1'[y] f2b'[y] + \\ U[y] f3b'[y] - f3b[y] U'[y] - f2b[y] f1''[y] - f3d''[y]$$

$$0$$

- Term in  $\varphi_0^{(0,1)}[T, X] \varphi_0^{(1,1)}[T, X]$  : a4h

```
a4h = -Coefficient[ Expand[a43],  $\varphi_0^{(1,1)}[T, X]$  ]
Solve[a4h]
```

```
2 f2a''[Y] - f3g(3)[Y]
```

```
0
```

- Select terms that do not contain  $\varphi_0^{(0,1)}[T, X]$

```
a45 = a4 /.  $\varphi_0^{(0,1)}[T, X] \rightarrow 0$ 
```

```
-r  $\varphi_0^{(0,2)}[T, X]$  - r f2b''[Y]  $\varphi_0^{(0,2)}[T, X]$  -
f2b'[Y] f1''[Y]  $\varphi_0^{(0,2)}[T, X]^2$  + f1[Y] f2b(3)[Y]  $\varphi_0^{(0,2)}[T, X]^2$  +
v  $\varphi_0^{(0,4)}[T, X]$  + 2 v  $\left( 2 f2a''[Y] \varphi_0^{(0,2)}[T, X]^2 + f2b''[Y] \varphi_0^{(0,4)}[T, X] \right)$  -
 $\varphi_0^{(1,2)}[T, X]$  - f2b''[Y]  $\varphi_0^{(1,2)}[T, X]$  + U''[Y]  $\left( r f3r[Y] \varphi_0^{(0,2)}[T, X] + \right.$ 
 $\left. f3b[Y] \varphi_0^{(0,2)}[T, X]^2 + f3d[Y] \varphi_0^{(0,4)}[T, X] + f3g[Y] \varphi_0^{(1,2)}[T, X] \right)$  -
U[Y]  $\left( r f3r''[Y] \varphi_0^{(0,2)}[T, X] + f3b''[Y] \varphi_0^{(0,2)}[T, X]^2 + f1[Y] \varphi_0^{(0,4)}[T, X] + \right.$ 
 $\left. f3d''[Y] \varphi_0^{(0,4)}[T, X] + f3g''[Y] \varphi_0^{(1,2)}[T, X] \right)$  + v  $\psi_4^{(0,0,4)}[T, X, Y]$ 
```

- Term in  $\varphi_0^{(0,4)}[T, X]$  : a4l : contribution to the amplitude equation

```
a4l = -Coefficient[a45,  $\varphi_0^{(0,4)}[T, X]$ ]
Integrate[a4l + v - f1[y] U[y], y]
Solve[a4l + v - f1[y] U[y]]
Integrate[-v + f1[y] U[y], {y, 0, 2  $\pi$ }]
```

$$-v + f1[y] U[y] - 2 v f2b''[y] + U[y] f3d''[y] - f3d[y] U''[y]$$

$$-2 v f2b'[y] + U[y] f3d'[y] - f3d[y] U'[y]$$

$$0$$

$$\int_0^{2\pi} (-v + f1[y] U[y]) dy$$

The last line is the contribution to the amplitude equation

- Term in  $\varphi_0^{(1,2)}[T, X]$  : a4n : Contributes to the amplitude equation

```
a4n = -Coefficient[Expand[a45],  $\varphi_0^{(1,2)}[T, X]$ ]
Integrate[a4n, y]
Solve[a4n]
```

$$1 + f2b''[y] + U[y] f3g''[y] - f3g[y] U''[y]$$

$$y + f2b'[y] + U[y] f3g'[y] - f3g[y] U'[y]$$

$$2\pi$$



■ Term in  $\varphi_0^{(0,2)}[T, X]^2$  : a4o

```
a4o = -Coefficient[Expand[a45],  $\varphi_0^{(0,2)}[T, X]^2$ ]
Integrate[a4o, y]
Solva[a4o]
```

$$f_2 b'[y] f_1''[y] - 4 \sqrt{f_2 a''[y]} + U[y] f_3 b''[y] - f_3 b[y] U''[y] - f_1[y] f_2 b^{(3)}[y]$$

$$- 4 \sqrt{f_2 a'[y]} + f_1'[y] f_2 b'[y] + U[y] f_3 b'[y] - f_3 b[y] U'[y] - f_1[y] f_2 b''[y]$$

0

■ Term in  $\varphi_0^{(0,2)}[T, X]$  : a4p : Contributes to the amplitude equation (if  $r \neq 0$ )

```
a4p = -Coefficient[Expand[a45] /.  $\varphi_1^{(0,1)}[T, X] \rightarrow 0$ ,  $\varphi_0^{(0,2)}[T, X]$ ]
Integrate[a4p, y]
Solva[a4p]
```

$$r + r f_2 b''[y] + r U[y] f_3 r''[y] - r f_3 r[y] U''[y]$$

$$r y + r f_2 b'[y] + r U[y] f_3 r'[y] - r f_3 r[y] U'[y]$$

$2 \pi r$

■ Verification

```
a4NN = -a4o  $\varphi_0^{(0,2)}[T, X]^2$  - a4n  $\varphi_0^{(1,2)}[T, X]$  - a4l  $\varphi_0^{(0,4)}[T, X]$  -
 $\varphi_0^{(0,1)}[T, X] (a4g \varphi_0^{(0,3)}[T, X] + a4h \varphi_0^{(1,1)}[T, X])$  -
 $\varphi_0^{(0,1)}[T, X]^2 (a4c \varphi_0^{(0,2)}[T, X])$  - a4a  $\varphi_0^{(0,1)}[T, X]^4$  -
a4u r  $\varphi_0^{(0,1)}[T, X]^2$  - a4p  $\varphi_0^{(0,2)}[T, X]$  +  $\mathcal{L}[\psi_4[T, X, y]]$ ;
Simplify[a4 - a4NN]
```

0

## Discussion

The amplitude equation is

$$\varphi_0^{(1,2)}[T, X] + r \varphi_0^{(0,2)}[T, X] - \left( \nu - \frac{1}{2\pi} \int_0^{2\pi} f_1[Y] U[Y] dY \right) \varphi_0^{(0,4)}[T, X] = 0$$

0

After integration by part, using the fact that  $\nu f_1'' = -U$ , the integral is  $\frac{1}{2\pi\nu} \int_0^{2\pi} \Psi^2 dy$

Hence we have again a negative viscosity effect with a threshold which requires to calculate  $f_1[y]$ .

Friction appears in this equation because it has been assumed of order  $\epsilon^2$ .

The amplitude equation has been obtained independently of any symmetry hypothesis

The only hypothesis is that  $\int_0^{2\pi} U[Y] dY = 0$ .

### ■ Solution of the first order problem for $f_1$

$f_1$  is solution of

$$\nu \partial_{y,y} f_1[Y] = -U[Y]$$

We solve for  $\chi[Y]$  such that  $f_1[Y] = \frac{A}{\nu} \chi[Y]$

```
χ1 = NIntegrate[ϕ1[s], {s, 0, #}] &;
χ2 = NIntegrate[Evaluate[ϕ2[s]], {s, 0, #}] &;
χ3 = NIntegrate[Evaluate[ϕ3[s]], {s, 0, #}] &;
χ1b =
  NIntegrate[NIntegrate[-Sin[θ[u]] /. Flow1, {u, π/2, s}], {s, 0, #}] &;
```

```
{Plot[χ1[y], {y, 0, 2 π}],
 Plot[χ2[y], {y, 0, 2 π}],
 Plot[χ3[y], {y, 0, 2 π}]}
```

\$Aborted

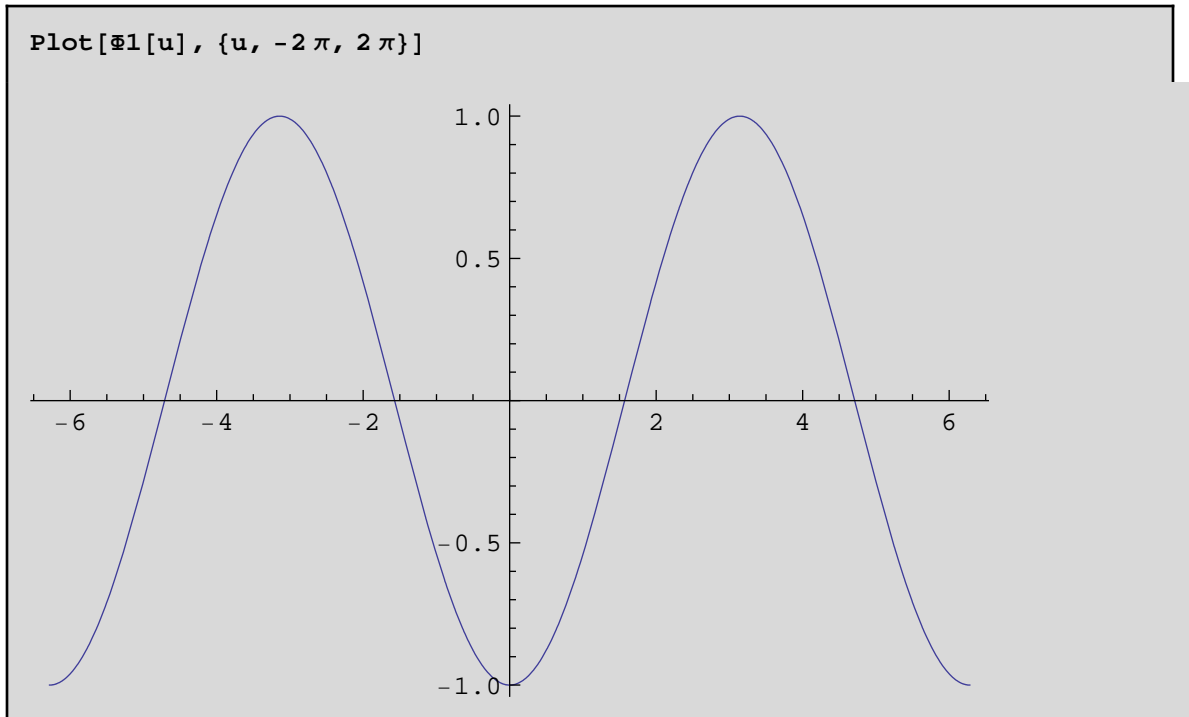

As  $\chi$  is a second integral of  $U$ , its shape is mostly determined by the main periodicity of the flow. Hence, one expects fairly small variations of the instability criterion from the standard Kolmogorov case.

### ■ Instability criterion (with no friction)

$$\text{NIntegrate}\left[\frac{1}{2\pi} \Phi_1[s]^2, \{s, 0, 2\pi\}\right]$$

$$\text{NIntegrate}\left[\frac{1}{2\pi} \Phi_2[s]^2, \{s, 0, 2\pi\}\right]$$

$$\text{NIntegrate}\left[\frac{1}{2\pi} \Phi_3[s]^2, \{s, 0, 2\pi\}\right]$$

0.5

0.699582

0.615096

We recover exactly  $\frac{1}{2}$  for the standard Kolmogorov flow  
 and 0.6995824769200031 for Flow2, which means that the critical  
 Reynolds number changes from  $\sqrt{2}$  to  $\sqrt{1.42942}$  (assuming  $r = 0$ ).

Dump the current state of this workspace and reload it

```
DumpSave["CH-lin1-nu-12.m6.mx", "Global`"]
```

```
{Global`}
```

```
<< CH-lin1-nu-12.m6.mx
```
